# Supplementary material for: High-throughput allele-specific expression across 250 environmental conditions
Source: Genome Res. 2016 Dec;26(12):1627–38. doi: 10.1101/gr.209759.116 (PMC5131815; doi:10.1101/gr.209759.116)
Supplement: Supplemental Material [file supp_gr.209759.116_Supplemental_Table_S2.xlsx]

## Sheet: ReadCountsShallow
PlateID	CellType	Cell Line	Barcode ID	Treatment ID	Total Reads	Aligned Reads	Quality Reads	Clean Reads
P1	LCL	GM18507	8	CO1	8982134	8982446	5781934	5263856
P1	LCL	GM18507	20	CO1	8698576	8698939	5484291	5028307
P1	LCL	GM18507	91	CO1	8112450	8112776	5415533	4572941
P1	LCL	GM18508	12	CO1	6629944	6630173	3931741	3478292
P1	LCL	GM18508	24	CO1	6650052	6650298	3797863	3449808
P1	LCL	GM18508	95	CO1	6726038	6726292	4356257	3846132
P1	LCL	GM19239	4	CO1	11153082	11153581	7665117	6796899
P1	LCL	GM19239	16	CO1	9283406	9283785	6263766	5515068
P1	LCL	GM19239	87	CO1	11465570	11465797	4644321	3721533
P1	LCL	GM18507	32	CO2	7332332	7332596	4617804	4078652
P1	LCL	GM18507	44	CO2	8497008	8497349	5157830	4292837
P1	LCL	GM18507	56	CO2	11492782	11493169	7031354	5999270
P1	LCL	GM18508	36	CO2	7563572	7563832	4807177	4245068
P1	LCL	GM18508	48	CO2	6900312	6900555	4221118	3712650
P1	LCL	GM18508	60	CO2	6279672	6279919	4009214	3569798
P1	LCL	GM19239	28	CO2	9693708	9694067	6730433	5700560
P1	LCL	GM19239	40	CO2	9204820	9205211	5940395	5282840
P1	LCL	GM19239	52	CO2	9144780	9145048	6139630	5077802
P1	LCL	GM18507	68	CO3	10286366	10286720	6021743	5090549
P1	LCL	GM18507	80	CO3	7928930	7929189	4328391	3860357
P1	LCL	GM18507	92	CO3	7661340	7661652	4620224	4081434
P1	LCL	GM18508	72	CO3	8075362	8075662	5085161	4427815
P1	LCL	GM18508	84	CO3	6726684	6726933	4468921	3982347
P1	LCL	GM18508	96	CO3	7351350	7351624	4783252	4220894
P1	LCL	GM19239	64	CO3	10734860	10735187	6811995	4120150
P1	LCL	GM19239	76	CO3	9356690	9357028	6200546	5412881
P1	LCL	GM19239	88	CO3	10580794	10581274	7188439	6200566
P1	LCL	KP39351	96	CO3	7351350	8522464	5661706	5246190
P1	LCL	GM18507	30	T10C1	8499304	8499619	5358556	4876076
P1	LCL	GM18508	34	T10C1	8128640	8128926	4850146	4303890
P1	LCL	GM19239	26	T10C1	9572630	9572852	4017766	3192709
P1	LCL	GM18507	18	T10C2	8449132	8449423	5364948	4818004
P1	LCL	GM18508	22	T10C2	6338206	6338449	3858137	3468797
P1	LCL	GM19239	14	T10C2	11658784	11659049	6040466	3926683
P1	LCL	GM18507	42	T11C1	8757428	8757769	5633553	5028302
P1	LCL	GM18508	46	T11C1	6735040	6735305	4086704	3685911
P1	LCL	GM19239	38	T11C1	9872312	9872585	5427170	4288716
P1	LCL	GM18507	54	T12C1	7913946	7914193	4526305	3958633
P1	LCL	GM18508	58	T12C1	7502250	7502535	4833007	4378306
P1	LCL	GM19239	50	T12C1	8562474	8562789	5899651	5467197
P1	LCL	GM18507	66	T13C1	7156126	7156362	3947103	3525808
P1	LCL	GM18508	70	T13C1	6198386	6198640	3986280	3440743
P1	LCL	GM19239	62	T13C1	8855870	8856173	5998195	5492057
P1	LCL	GM18507	78	T14C1	8618192	8618512	5308127	4755017
P1	LCL	GM18508	82	T14C1	7120018	7120279	4504883	3995944
P1	LCL	GM19239	74	T14C1	10809430	10809651	5365955	4242271
P1	LCL	GM18507	90	T15C1	7740372	7740673	5187631	4740136
P1	LCL	GM18508	94	T15C1	6731744	6731998	4298630	3911779
P1	LCL	GM19239	86	T15C1	10848212	10848540	5889382	4841256
P1	LCL	GM18507	7	T16C1	701502	701509	123001	110477
P1	LCL	GM18508	11	T16C1	10269274	10269418	2164267	1468453
P1	LCL	GM19239	3	T16C1	9714568	9714779	3590213	2625885
P1	LCL	GM18507	19	T17C1	8739694	8739982	5480425	4768454
P1	LCL	GM18508	23	T17C1	6696608	6696822	4298961	3648496
P1	LCL	GM19239	15	T17C1	8587378	8587705	5158822	4685396
P1	LCL	GM18507	31	T18C1	8199866	8200158	5247801	4714074
P1	LCL	GM18508	35	T18C1	7948330	7948629	5398229	4958100
P1	LCL	GM19239	27	T18C1	9467990	9468173	4369234	3688348
P1	LCL	GM18507	43	T19C1	8423050	8423342	4422174	3446162
P1	LCL	GM18508	47	T19C1	6668894	6669141	3769230	3373493
P1	LCL	GM19239	39	T19C1	8162946	8163278	4982259	4578684
P1	LCL	GM18507	5	T1C1	10202328	10202749	6831989	6201506
P1	LCL	GM18508	9	T1C1	8144940	8145241	5329513	4754155
P1	LCL	GM19239	1	T1C1	133190	133192	43712	41511
P1	LCL	GM18507	55	T20C1	10012404	10012777	6441712	5753978
P1	LCL	GM18508	59	T20C1	6561874	6562098	4370312	3881743
P1	LCL	GM19239	51	T20C1	7624232	7624477	4992566	4091439
P1	LCL	GM18507	67	T21C1	7554238	7554450	4131751	3705169
P1	LCL	GM18508	71	T21C1	6401644	6401869	4289513	3540148
P1	LCL	GM19239	63	T21C1	7198290	7198563	5021070	4622675
P1	LCL	GM18507	79	T22C1	7146570	7146831	4152117	3666303
P1	LCL	GM18508	83	T22C1	5376834	5377027	3491788	3126657
P1	LCL	GM19239	75	T22C1	9145310	9145704	6113913	5607258
P1	LCL	GM18507	17	T2C1	9534510	9534895	6172275	5441223
P1	LCL	GM18508	21	T2C1	7554416	7554709	5080808	4577748
P1	LCL	GM19239	13	T2C1	11067434	11067738	7573526	4848239
P1	LCL	GM18507	29	T3C1	8059274	8059588	5550940	5168962
P1	LCL	GM18508	33	T3C1	7446862	7447126	4791186	4315932
P1	LCL	GM19239	25	T3C1	11097792	11098216	8031078	7282319
P1	LCL	GM18507	41	T4C1	8263938	8264233	5514017	4873782
P1	LCL	GM18508	45	T4C1	9282742	9283101	6203854	5510671
P1	LCL	GM19239	37	T4C1	9670410	9670822	7004814	6168852
P1	LCL	GM18507	53	T5C1	9033490	9033854	5883373	5441453
P1	LCL	GM18508	57	T5C1	10922610	10923022	7352169	6495167
P1	LCL	GM19239	49	T5C1	10164520	10164950	7292120	6636609
P1	LCL	GM18507	65	T6C1	7681990	7682294	4512872	4083304
P1	LCL	GM18508	69	T6C1	9977132	9977498	6616987	5756507
P1	LCL	GM19239	61	T6C1	9167186	9167585	6864077	6262199
P1	LCL	GM18507	77	T7C1	9999196	9999612	6518853	5873860
P1	LCL	GM18508	81	T7C1	10073356	10073691	6373532	5150888
P1	LCL	GM19239	73	T7C1	10212644	10212981	7394194	6633188
P1	LCL	GM18507	89	T8C1	9643964	9644372	6451134	5806996
P1	LCL	GM18508	93	T8C1	8173848	8174165	5279536	4547765
P1	LCL	GM19239	85	T8C1	16050850	16050956	2461638	1689359
P1	LCL	GM18507	6	T9C1	10265286	10265691	6767152	6059031
P1	LCL	GM18508	10	T9C1	6962854	6963057	4162236	3783383
P1	LCL	GM19239	2	T9C1	10400412	10400827	7113246	6356675
P10	SMC	SM046-A	64	CO1	5064238	5064358	3110858	2838931
P10	SMC	SM046-A	76	CO1	5659440	5659528	3444993	3147290
P10	SMC	SM046-A	88	CO1	8174756	8174890	5128532	4656189
P10	SMC	SM050-A	68	CO1	10234394	10234624	6543427	5896363
P10	SMC	SM050-A	80	CO1	10206188	10206477	6593733	5873964
P10	SMC	SM050-A	92	CO1	7062714	7062864	4524620	4113333
P10	SMC	SM794-L	72	CO1	9242092	9242325	5903365	5335129
P10	SMC	SM794-L	84	CO1	9309004	9309304	6029931	5388210
P10	SMC	SM794-L	96	CO1	10312286	10312529	6674680	5982638
P10	SMC	SM046-A	28	CO2	8683400	8683541	5496812	4967801
P10	SMC	SM046-A	40	CO2	5538706	5538891	3427678	3155513
P10	SMC	SM046-A	52	CO2	7083580	7083743	4546709	4143758
P10	SMC	SM050-A	32	CO2	4899826	4900010	3078327	2829605
P10	SMC	SM050-A	44	CO2	5301908	5302078	3460072	3178124
P10	SMC	SM050-A	56	CO2	6750568	6750767	4517143	4112278
P10	SMC	SM794-L	36	CO2	6042564	6042710	3863402	3542389
P10	SMC	SM794-L	48	CO2	6630426	6630633	4386050	4003219
P10	SMC	SM794-L	60	CO2	5582102	5582201	3514052	3228753
P10	SMC	SM046-A	85	T16C2	46588522	46588646	29267131	24372633
P10	SMC	SM050-A	89	T16C2	11981986	11982164	7597478	6760279
P10	SMC	SM794-L	93	T16C2	12943758	12943834	8062375	7102051
P10	SMC	SM046-A	16	T17C2	8758004	8758126	5016813	4472390
P10	SMC	SM050-A	20	T17C2	15072102	15072330	8647972	7607474
P10	SMC	SM794-L	24	T17C2	11425586	11425835	7417108	6611149
P10	SMC	SM046-A	1	T24C1	32149866	32149987	19990643	16984450
P10	SMC	SM050-A	5	T24C1	13938936	13939013	8863413	7906651
P10	SMC	SM794-L	9	T24C1	11652146	11652366	7524518	6706397
P10	SMC	SM046-A	13	T25C1	27287476	27287646	16486841	14287636
P10	SMC	SM050-A	17	T25C1	17153936	17154016	10738594	9382725
P10	SMC	SM794-L	21	T25C1	10459616	10459789	6573250	5886024
P10	SMC	SM046-A	25	T26C1	26997830	26998019	16788780	14346822
P10	SMC	SM050-A	29	T26C1	11750438	11750575	7632738	6805826
P10	SMC	SM794-L	33	T26C1	18294378	18294511	11393582	9934233
P10	SMC	SM046-A	37	T27C1	29380646	29380775	17912581	15428289
P10	SMC	SM050-A	41	T27C1	13025476	13025579	8214346	7249645
P10	SMC	SM794-L	45	T27C1	13705254	13705418	8731055	7682692
P10	SMC	SM046-A	49	T28C1	32917730	32917863	20022832	17092552
P10	SMC	SM050-A	53	T28C1	11099814	11099928	7043960	6283041
P10	SMC	SM794-L	57	T28C1	8542240	8542398	5334344	4799609
P10	SMC	SM046-A	61	T29C1	32930094	32930257	20291008	17336978
P10	SMC	SM050-A	65	T29C1	12187826	12187958	6806042	6117270
P10	SMC	SM794-L	69	T29C1	12560932	12561078	7940354	7002598
P10	SMC	SM046-A	73	T30C1	34762222	34762341	21686258	18398088
P10	SMC	SM050-A	77	T30C1	22482364	22482502	14281619	12387952
P10	SMC	SM794-L	81	T30C1	14794400	14794800	9476192	8281083
P10	SMC	SM046-A	2	T32C1	12987948	12988096	6820010	6051140
P10	SMC	SM050-A	6	T32C1	8998948	8999058	5655535	5062153
P10	SMC	SM794-L	10	T32C1	42116800	42117113	25705664	21099447
P10	SMC	SM046-A	14	T33C1	11320148	11320293	6656208	5922531
P10	SMC	SM050-A	18	T33C1	12961604	12961713	8103923	7158282
P10	SMC	SM794-L	22	T33C1	15334790	15334930	9507993	8339486
P10	SMC	SM046-A	26	T34C1	10824644	10824767	6139800	5421432
P10	SMC	SM050-A	30	T34C1	17820660	17820792	11169125	9749185
P10	SMC	SM794-L	34	T34C1	10823482	10823601	6898272	6178261
P10	SMC	SM046-A	38	T35C1	11177286	11177363	7018758	6306267
P10	SMC	SM050-A	42	T35C1	15157924	15158044	9662614	8535752
P10	SMC	SM794-L	46	T35C1	16395542	16395799	10563769	9264802
P10	SMC	SM046-A	50	T36C1	11459090	11459187	7032160	6306068
P10	SMC	SM050-A	54	T36C1	11285336	11285483	7258942	6435896
P10	SMC	SM794-L	58	T36C1	11854864	11855069	7689205	6827372
P10	SMC	SM046-A	62	T37C1	13271412	13271546	8249842	7387422
P10	SMC	SM050-A	66	T37C1	6289204	6289305	3958302	3578940
P10	SMC	SM794-L	70	T37C1	10953114	10953267	6924340	6091820
P10	SMC	SM046-A	74	T38C1	8548106	8548201	4994626	4465459
P10	SMC	SM050-A	78	T38C1	11842932	11843050	7595030	6712836
P10	SMC	SM794-L	82	T38C1	13577634	13577743	8526173	7463193
P10	SMC	SM046-A	86	T39C1	14163450	14163590	8509599	7525261
P10	SMC	SM050-A	90	T39C1	14555892	14556010	9110853	7970626
P10	SMC	SM794-L	94	T39C1	13406448	13406637	8251132	7225874
P10	SMC	SM046-A	3	T40C1	13844674	13844869	8793875	7856179
P10	SMC	SM050-A	7	T40C1	13955334	13955419	8665498	7693368
P10	SMC	SM794-L	11	T40C1	4050624	4050767	2655663	2448209
P10	SMC	SM046-A	15	T41C1	12484924	12485070	7835547	7002692
P10	SMC	SM050-A	19	T41C1	10167552	10167654	6256356	5620813
P10	SMC	SM794-L	23	T41C1	15444128	15444217	9465078	8322179
P10	SMC	SM046-A	27	T42C1	14965732	14965931	9271394	8188614
P10	SMC	SM050-A	31	T42C1	15441618	15441714	9576558	8479561
P10	SMC	SM794-L	35	T42C1	12164900	12165109	7546257	6752926
P10	SMC	SM046-A	39	T43C1	6556154	6556230	4012527	3691307
P10	SMC	SM050-A	43	T43C1	10607618	10607776	6738731	6024288
P10	SMC	SM794-L	47	T43C1	23648600	23648655	14461943	12526513
P10	SMC	SM046-A	51	T44C1	13792486	13792656	8805251	7835420
P10	SMC	SM050-A	55	T44C1	10549706	10549828	6616862	5904702
P10	SMC	SM794-L	59	T44C1	8202878	8203029	5289098	4799111
P10	SMC	SM046-A	63	T45C1	13120954	13121045	8198701	7302807
P10	SMC	SM050-A	67	T45C1	8493138	8493263	5200493	4672879
P10	SMC	SM794-L	71	T45C1	10981068	10981108	5047820	4496890
P10	SMC	SM046-A	75	T46C1	11182970	11183107	6978514	6264217
P10	SMC	SM050-A	79	T46C1	17782898	17783033	11053164	9622139
P10	SMC	SM794-L	83	T46C1	11220516	11220720	7098422	6358766
P10	SMC	SM046-A	87	T47C1	16541092	16541284	10608073	9354039
P10	SMC	SM050-A	91	T47C1	10014002	10014084	6113774	5439217
P10	SMC	SM794-L	95	T47C1	12099088	12099259	7420973	6563066
P10	SMC	SM046-A	4	T48C1	14738514	14738709	8730568	7635685
P10	SMC	SM050-A	8	T48C1	11976776	11977017	6937976	6127541
P10	SMC	SM794-L	12	T48C1	10726994	10727118	6606310	5925225
P11	Mel	NM10-L	12	CO1	3676278	3629912	2329719	2159882
P11	Mel	NM10-L	24	CO1	3757128	6949977	4632341	4196367
P11	Mel	NM10-L	95	CO1	4186628	4414657	2822350	2578348
P11	Mel	NM31-P	8	CO1	5372994	5968421	3589163	3237100
P11	Mel	NM31-P	20	CO1	4110682	5773932	3474307	3154065
P11	Mel	NM31-P	91	CO1	3899432	2817682	1797534	1666073
P11	Mel	NM85-L	4	CO1	8757862	4452605	2758813	2510913
P11	Mel	NM85-L	16	CO1	3573084	3326296	2015397	1846709
P11	Mel	NM85-L	87	CO1	2589014	4992940	3347943	3074497
P11	Mel	NM10-L	36	CO2	5032414	4184586	2724111	2521777
P11	Mel	NM10-L	48	CO2	5530796	5445039	3642339	3339887
P11	Mel	NM10-L	60	CO2	4261326	2927265	1899210	1772104
P11	Mel	NM31-P	32	CO2	5873436	4858364	3055485	2809223
P11	Mel	NM31-P	44	CO2	5413276	4325184	2852797	2633976
P11	Mel	NM31-P	56	CO2	4251798	5800461	3917163	3580607
P11	Mel	NM85-L	28	CO2	4318902	3719951	2433905	2251352
P11	Mel	NM85-L	40	CO2	5330720	4001013	2529200	2343604
P11	Mel	NM85-L	52	CO2	5622564	3963203	2621227	2422539
P11	Mel	NM10-L	72	CO3	9434510	7232821	4683191	4262164
P11	Mel	NM10-L	84	CO3	4450986	8834550	5744570	5140467
P11	Mel	NM10-L	96	CO3	3358724	6926107	4573324	4151280
P11	Mel	NM31-P	68	CO3	4271978	5685846	3735307	3426436
P11	Mel	NM31-P	80	CO3	3650860	7503769	4935698	4439449
P11	Mel	NM31-P	92	CO3	4210330	3779998	2512998	2321544
P11	Mel	NM85-L	64	CO3	2428654	3094260	1952486	1802175
P11	Mel	NM85-L	76	CO3	2163400	2284884	1445342	1350224
P11	Mel	NM85-L	88	CO3	4265262	3540138	2303062	2136930
P11	Mel	NM10-L	34	T10C1	4530900	3857041	2560832	2369375
P11	Mel	NM31-P	30	T10C1	3098510	3394020	2233947	2064563
P11	Mel	NM85-L	26	T10C1	4643202	2797403	1673805	1538929
P11	Mel	NM10-L	22	T10C2	5260506	3890096	2533566	2330470
P11	Mel	NM31-P	18	T10C2	4777978	2746141	1822773	1689972
P11	Mel	NM85-L	14	T10C2	7809074	4027267	2477047	2269588
P11	Mel	NM10-L	46	T11C1	5579592	6908413	4614254	4176256
P11	Mel	NM31-P	42	T11C1	3554648	3799024	2539255	2349530
P11	Mel	NM85-L	38	T11C1	4182824	2190773	1452221	1365483
P11	Mel	NM10-L	58	T12C1	4728678	6791217	4513449	4083788
P11	Mel	NM31-P	54	T12C1	3287690	4017025	2687504	2459485
P11	Mel	NM85-L	50	T12C1	4508112	2951841	1906332	1776788
P11	Mel	NM10-L	70	T13C1	3317892	3887095	2560910	2346257
P11	Mel	NM31-P	66	T13C1	2670642	3093337	2002477	1847316
P11	Mel	NM85-L	62	T13C1	7231272	3523402	2298532	2135621
P11	Mel	NM10-L	82	T14C1	6806894	3544611	2333353	2146531
P11	Mel	NM31-P	78	T14C1	2821182	3621096	2424435	2222148
P11	Mel	NM85-L	74	T14C1	6156986	2971307	1811006	1671813
P11	Mel	NM10-L	94	T15C1	4080830	5807425	3712851	3352756
P11	Mel	NM31-P	90	T15C1	2253900	3150826	2081983	1915152
P11	Mel	NM85-L	86	T15C1	6143352	3751254	2377631	2185550
P11	Mel	NM10-L	11	T16C1	5168656	4012817	2632464	2427476
P11	Mel	NM31-P	7	T16C1	5257206	2318657	1518623	1425295
P11	Mel	NM85-L	3	T16C1	4098808	4653219	3083298	2843173
P11	Mel	NM10-L	23	T17C1	2532658	2575867	1673313	1558017
P11	Mel	NM31-P	19	T17C1	3630538	3097342	2015085	1873177
P11	Mel	NM85-L	15	T17C1	4860308	3538238	2322687	2156414
P11	Mel	NM10-L	35	T18C1	2344640	5294495	3421756	3140681
P11	Mel	NM31-P	31	T18C1	3422518	3087044	2020647	1880974
P11	Mel	NM85-L	27	T18C1	8071096	4784565	3098082	2837791
P11	Mel	NM10-L	47	T19C1	5225252	1688813	1098086	1037089
P11	Mel	NM31-P	43	T19C1	6545200	4208656	2770991	2548197
P11	Mel	NM85-L	39	T19C1	5386284	2289406	1462775	1385347
P11	Mel	NM10-L	9	T1C1	2666324	6670786	4421095	4009027
P11	Mel	NM31-P	5	T1C1	3793706	2581685	1717668	1612183
P11	Mel	NM85-L	1	T1C1	2837788	2559975	1693757	1584648
P11	Mel	NM10-L	59	T20C1	3400592	4419405	2929790	2705464
P11	Mel	NM31-P	55	T20C1	5481946	3540360	2316254	2138480
P11	Mel	NM85-L	51	T20C1	4583318	4063544	2712424	2502808
P11	Mel	NM10-L	71	T21C1	3950810	999574	475865	457311
P11	Mel	NM31-P	67	T21C1	4371348	3214767	2047446	1894827
P11	Mel	NM85-L	63	T21C1	5110134	2546389	1670510	1565265
P11	Mel	NM10-L	83	T22C1	3944546	5535174	3629497	3322010
P11	Mel	NM31-P	79	T22C1	3897686	3649151	2389004	2201104
P11	Mel	NM85-L	75	T22C1	4056322	3196295	2091442	1949311
P11	Mel	NM10-L	93	T23C1	2084626	2208576	1453364	1359178
P11	Mel	NM31-P	89	T23C1	3956268	4896542	3227463	2956393
P11	Mel	NM85-L	85	T23C1	1723322	2900018	1938423	1803485
P11	Mel	NM10-L	21	T2C1	3834400	4679959	3046356	2797053
P11	Mel	NM31-P	17	T2C1	2750692	2543824	1683141	1568856
P11	Mel	NM85-L	13	T2C1	2908896	3807666	2459541	2281571
P11	Mel	NM10-L	33	T3C1	3032250	3762027	2453541	2270546
P11	Mel	NM31-P	29	T3C1	2671768	3695475	2508779	2319261
P11	Mel	NM85-L	25	T3C1	8325790	4486065	2951940	2700385
P11	Mel	NM10-L	45	T4C1	5136178	4738954	3149345	2878010
P11	Mel	NM31-P	41	T4C1	4182666	2692091	1785611	1661093
P11	Mel	NM85-L	37	T4C1	1695684	3452647	2251439	2092132
P11	Mel	NM10-L	57	T5C1	2479954	4178396	2693908	2476796
P11	Mel	NM31-P	53	T5C1	1569390	3220332	2139805	1981249
P11	Mel	NM85-L	49	T5C1	6582286	3242307	2108351	1962391
P11	Mel	NM10-L	69	T6C1	2477358	4448756	2923136	2673784
P11	Mel	NM31-P	65	T6C1	2577042	3557124	2077015	1928988
P11	Mel	NM85-L	61	T6C1	3221416	3673433	2406750	2232626
P11	Mel	NM10-L	81	T7C1	2817770	11582500	7518168	6625898
P11	Mel	NM31-P	77	T7C1	3729180	3369056	2247911	2085949
P11	Mel	NM85-L	73	T7C1	3840610	3076821	2044349	1905866
P11	Mel	NM10-L	10	T9C1	5290208	8507951	5478886	4870741
P11	Mel	NM31-P	6	T9C1	3546026	3564550	2340469	2153818
P11	Mel	NM85-L	2	T9C1	4519450	3423988	1896754	1745208
P12	Mel	NM10-L	72	CO1	3272780	9434874	5768172	5195761
P12	Mel	NM10-L	84	CO1	1715110	4451148	2541983	2354698
P12	Mel	NM10-L	96	CO1	4900192	3358879	2096357	1940701
P12	Mel	NM31-P	68	CO1	6439800	4272137	2808750	2583355
P12	Mel	NM31-P	80	CO1	2814992	3650978	2386589	2201201
P12	Mel	NM31-P	92	CO1	3315560	4210501	2862805	2639562
P12	Mel	NM85-L	64	CO1	4714888	2428734	1489957	1403681
P12	Mel	NM85-L	76	CO1	5525820	2163469	1408536	1333848
P12	Mel	NM85-L	88	CO1	5191046	4265457	2738379	2547603
P12	Mel	NM10-L	36	CO2	3065978	5032613	2979813	2760458
P12	Mel	NM10-L	48	CO2	2623328	5531026	3533458	3249315
P12	Mel	NM10-L	60	CO2	2220474	4261493	2639399	2435920
P12	Mel	NM31-P	32	CO2	2820646	5873645	3988159	3625475
P12	Mel	NM31-P	44	CO2	1966124	5413481	3601574	3295825
P12	Mel	NM31-P	56	CO2	4954572	4251969	2727901	2513368
P12	Mel	NM85-L	28	CO2	4566762	4319061	2744858	2550182
P12	Mel	NM85-L	40	CO2	4275424	5330912	3178429	2942258
P12	Mel	NM85-L	52	CO2	4671198	5622748	3501440	3220615
P12	Mel	NM10-L	93	T16C2	4202684	2084706	1425296	1351610
P12	Mel	NM31-P	89	T16C2	8259658	3956405	2751091	2575373
P12	Mel	NM85-L	85	T16C2	5657214	1723389	1205596	1161355
P12	Mel	NM10-L	24	T17C2	3869916	3757283	2484529	2309770
P12	Mel	NM31-P	20	T17C2	4057940	4110816	2647931	2440373
P12	Mel	NM85-L	16	T17C2	6591638	3573220	2098836	1951110
P12	Mel	NM10-L	9	T24C1	3859368	2666438	1716009	1622564
P12	Mel	NM31-P	5	T24C1	3873718	3793855	2640947	2485574
P12	Mel	NM85-L	1	T24C1	3761272	2837884	1955510	1854058
P12	Mel	NM10-L	21	T25C1	2907642	3834539	2375551	2211873
P12	Mel	NM31-P	17	T25C1	5276262	2750803	1895284	1794554
P12	Mel	NM85-L	13	T25C1	5135934	2909016	2003312	1902296
P12	Mel	NM10-L	33	T26C1	2617726	3032371	1996651	1877276
P12	Mel	NM31-P	29	T26C1	4029576	2671880	1882129	1786416
P12	Mel	NM85-L	25	T26C1	4894308	8326090	5752622	5321830
P12	Mel	NM10-L	45	T27C1	3533736	5136369	3319270	3057839
P12	Mel	NM31-P	41	T27C1	5322886	4182808	2869999	2677185
P12	Mel	NM85-L	37	T27C1	4811186	1695733	1187105	1143428
P12	Mel	NM10-L	57	T28C1	3374424	2480060	1431563	1355888
P12	Mel	NM31-P	53	T28C1	4444596	1569435	1084432	1041414
P12	Mel	NM85-L	49	T28C1	5376048	6582531	4602460	4276096
P12	Mel	NM10-L	69	T29C1	3434712	2477460	1563693	1476316
P12	Mel	NM31-P	65	T29C1	6095342	2577120	1366227	1308874
P12	Mel	NM85-L	61	T29C1	5067070	3221520	2249494	2143216
P12	Mel	NM10-L	81	T30C1	2930224	2817888	1851800	1742608
P12	Mel	NM31-P	77	T30C1	7572202	3729326	2558855	2404244
P12	Mel	NM85-L	73	T30C1	3729214	3840765	2597372	2446363
P12	Mel	NM10-L	10	T32C1	2683546	5290420	3462285	3181036
P12	Mel	NM31-P	6	T32C1	4716334	3546153	2232818	2082938
P12	Mel	NM85-L	2	T32C1	5388706	4519592	2807310	2616561
P12	Mel	NM10-L	22	T33C1	3192952	5260702	3335126	3070786
P12	Mel	NM31-P	18	T33C1	5238648	4778165	3153420	2905865
P12	Mel	NM85-L	14	T33C1	3800920	7809397	4892700	4438322
P12	Mel	NM10-L	34	T34C1	3065824	4531075	2812147	2621555
P12	Mel	NM31-P	30	T34C1	3379198	3098640	1987377	1858943
P12	Mel	NM85-L	26	T34C1	3389924	4643384	2958119	2725817
P12	Mel	NM10-L	46	T35C1	2644026	5579803	3193861	2940325
P12	Mel	NM31-P	42	T35C1	3527154	3554804	2369088	2212397
P12	Mel	NM85-L	38	T35C1	5439040	4182996	2699704	2514538
P12	Mel	NM10-L	58	T36C1	2221510	4728860	2902601	2693859
P12	Mel	NM31-P	54	T36C1	3154564	3287795	1892855	1764301
P12	Mel	NM85-L	50	T36C1	5122938	4508310	3002324	2781881
P12	Mel	NM10-L	70	T37C1	2492268	3318026	1944243	1825877
P12	Mel	NM31-P	66	T37C1	4358446	2670745	1669549	1566024
P12	Mel	NM85-L	62	T37C1	10227706	7231520	4752228	4358106
P12	Mel	NM10-L	82	T38C1	3537762	6807192	4358649	3951684
P12	Mel	NM31-P	78	T38C1	4182204	2821306	1837610	1714890
P12	Mel	NM85-L	74	T38C1	5155962	6157234	3890288	3521844
P12	Mel	NM10-L	94	T39C1	7000432	4081008	2454605	2281966
P12	Mel	NM31-P	90	T39C1	3848524	2253998	1483445	1398751
P12	Mel	NM85-L	86	T39C1	7048570	6143579	4040023	3692113
P12	Mel	NM10-L	11	T40C1	2654892	5168910	3087904	2868692
P12	Mel	NM31-P	7	T40C1	8596074	5257452	3588762	3308015
P12	Mel	NM85-L	3	T40C1	4215568	4099010	2761215	2605738
P12	Mel	NM10-L	23	T41C1	3311880	2532760	1432626	1354911
P12	Mel	NM31-P	19	T41C1	2688762	3630647	2346125	2197176
P12	Mel	NM85-L	15	T41C1	6078976	4860502	3686480	3480414
P12	Mel	NM10-L	35	T42C1	4462512	2344735	1522348	1442772
P12	Mel	NM31-P	31	T42C1	2889616	3422664	2025790	1903312
P12	Mel	NM85-L	27	T42C1	6804286	8071394	5417512	5007616
P12	Mel	NM10-L	47	T43C1	2526952	5225424	3500614	3235182
P12	Mel	NM31-P	43	T43C1	2557492	6545442	4439662	4074000
P12	Mel	NM85-L	39	T43C1	8284330	5386461	3695046	3459214
P12	Mel	NM10-L	59	T44C1	2613690	3400735	2128736	1996074
P12	Mel	NM31-P	55	T44C1	2859852	5482136	3664287	3381524
P12	Mel	NM85-L	51	T44C1	12229754	4583514	3032488	2852449
P12	Mel	NM10-L	71	T45C1	4674012	3950937	2100904	1979690
P12	Mel	NM31-P	67	T45C1	3154158	4371511	2885985	2691998
P12	Mel	NM85-L	63	T45C1	5010000	5110339	3781459	3572938
P12	Mel	NM10-L	83	T46C1	2815470	3944723	2567658	2392773
P12	Mel	NM31-P	79	T46C1	3872172	3897822	2616366	2442215
P12	Mel	NM85-L	75	T46C1	7881916	4056478	2705847	2531013
P12	Mel	NM10-L	95	T47C1	4681492	4186823	2690246	2480542
P12	Mel	NM31-P	91	T47C1	1655018	3899569	2757483	2561589
P12	Mel	NM85-L	87	T47C1	3576328	2589099	1767827	1686428
P12	Mel	NM10-L	12	T48C1	2583558	3676426	2443276	2267495
P12	Mel	NM31-P	8	T48C1	4052426	5373203	3534082	3224966
P12	Mel	NM85-L	4	T48C1	4826260	8758221	5457095	4948358
P4	HUVEC	H004-A	8	CO1	6830798	6831012	4621325	4258842
P4	HUVEC	H004-A	20	CO1	7954126	7954387	5466618	5040741
P4	HUVEC	H004-A	91	CO1	3698398	3698500	2656862	2487935
P4	HUVEC	H013-A	4	CO1	10824354	10824650	7929200	7087746
P4	HUVEC	H013-A	16	CO1	17852	17852	1649	1602
P4	HUVEC	H013-A	87	CO1	10915642	10915978	7491036	6654213
P4	HUVEC	H288-L	12	CO1	2891022	2891100	2062013	1974990
P4	HUVEC	H288-L	24	CO1	3528340	3528433	2555346	2436421
P4	HUVEC	H288-L	95	CO1	2807802	2807889	1987681	1900511
P4	HUVEC	H004-A	32	CO2	6642184	6642370	4527072	4053368
P4	HUVEC	H004-A	44	CO2	1364826	1364871	888365	833564
P4	HUVEC	H004-A	56	CO2	2848966	2849042	1956930	1786020
P4	HUVEC	H013-A	28	CO2	5100632	5100738	3717484	3400690
P4	HUVEC	H013-A	40	CO2	6057910	6058107	4215312	3851343
P4	HUVEC	H013-A	52	CO2	5260654	5260808	3748873	3461227
P4	HUVEC	H288-L	36	CO2	2808708	2808792	2020355	1936928
P4	HUVEC	H288-L	48	CO2	2170142	2170213	1603878	1541964
P4	HUVEC	H288-L	60	CO2	2755192	2755268	1974636	1874238
P4	HUVEC	H004-A	68	CO3	5225558	5225743	3454811	3206310
P4	HUVEC	H004-A	80	CO3	4688288	4688440	3370506	3159230
P4	HUVEC	H004-A	92	CO3	13591126	13591562	10045324	8887314
P4	HUVEC	H013-A	64	CO3	8345188	8345424	6089483	5361364
P4	HUVEC	H013-A	76	CO3	4593492	4593633	3300697	3067749
P4	HUVEC	H013-A	88	CO3	6436184	6436375	4693663	4281636
P4	HUVEC	H288-L	72	CO3	4184254	4184392	3013770	2853220
P4	HUVEC	H288-L	84	CO3	3701630	3701738	2715219	2580193
P4	HUVEC	H288-L	96	CO3	3685198	3685345	2757234	2639158
P4	HUVEC	H004-A	30	T10C1	5471714	5471859	3857999	3468746
P4	HUVEC	H013-A	26	T10C1	2464086	2464174	1641254	1542336
P4	HUVEC	H288-L	34	T10C1	3220996	3221100	2224160	2111797
P4	HUVEC	H004-A	18	T10C2	5830374	5830539	4201862	3876784
P4	HUVEC	H013-A	14	T10C2	815244	815265	561060	534225
P4	HUVEC	H288-L	22	T10C2	3132366	3132478	2229068	2128264
P4	HUVEC	H004-A	42	T11C1	3439064	3439175	2413698	2217945
P4	HUVEC	H013-A	38	T11C1	1532988	1533023	992674	934963
P4	HUVEC	H288-L	46	T11C1	2821564	2821652	2022508	1936576
P4	HUVEC	H004-A	54	T12C1	4804296	4804433	3322282	3043685
P4	HUVEC	H013-A	50	T12C1	7162916	7163143	4828587	4383220
P4	HUVEC	H288-L	58	T12C1	3596552	3596642	2528741	2401469
P4	HUVEC	H004-A	66	T13C1	4549160	4549309	3080197	2781060
P4	HUVEC	H013-A	62	T13C1	4501410	4501543	3167278	2974293
P4	HUVEC	H288-L	70	T13C1	4479960	4480113	3178954	2974616
P4	HUVEC	H004-A	78	T14C1	6565452	6565651	4835938	4304039
P4	HUVEC	H013-A	74	T14C1	3224002	3224095	2216933	1999411
P4	HUVEC	H288-L	82	T14C1	2812504	2812597	1962528	1878783
P4	HUVEC	H004-A	90	T15C1	3890658	3890775	2887031	2730958
P4	HUVEC	H013-A	86	T15C1	3316404	3316507	2339919	2192647
P4	HUVEC	H288-L	94	T15C1	2811586	2811662	2014712	1931214
P4	HUVEC	H004-A	7	T16C1	7735416	7735684	5277591	4938013
P4	HUVEC	H013-A	3	T16C1	4946248	4946434	3617444	3329252
P4	HUVEC	H288-L	11	T16C1	5838960	5839159	3898877	3691917
P4	HUVEC	H004-A	19	T17C1	8291056	8291317	6222540	5652614
P4	HUVEC	H013-A	15	T17C1	7147776	7147990	5229379	4714874
P4	HUVEC	H288-L	23	T17C1	8792530	8792824	6363111	5866626
P4	HUVEC	H004-A	31	T18C1	8448422	8448739	6141479	5699353
P4	HUVEC	H013-A	27	T18C1	7207182	7207383	4964809	4452797
P4	HUVEC	H288-L	35	T18C1	4908016	4908197	3456612	3215609
P4	HUVEC	H004-A	43	T19C1	6637406	6637633	4692184	4332675
P4	HUVEC	H013-A	39	T19C1	5767360	5767533	4224578	3916653
P4	HUVEC	H288-L	47	T19C1	8679882	8680122	5395672	4938227
P4	HUVEC	H004-A	5	T1C1	3620704	3620834	2629011	2472652
P4	HUVEC	H013-A	1	T1C1	3809842	3809967	2636069	2495521
P4	HUVEC	H288-L	9	T1C1	11440920	11441281	8071042	6882042
P4	HUVEC	H004-A	55	T20C1	7831756	7832012	4956434	4462125
P4	HUVEC	H013-A	51	T20C1	6115886	6116092	4180097	3821451
P4	HUVEC	H288-L	59	T20C1	3919336	3919458	2747498	2603353
P4	HUVEC	H004-A	67	T21C1	10961296	10961574	5636944	4968466
P4	HUVEC	H013-A	63	T21C1	6196928	6197117	4549980	4080251
P4	HUVEC	H288-L	71	T21C1	14732810	14733315	10530684	8995748
P4	HUVEC	H004-A	79	T22C1	5287522	5287681	3700967	3438435
P4	HUVEC	H013-A	75	T22C1	7932142	7932386	5319536	4761327
P4	HUVEC	H288-L	83	T22C1	2685920	2685993	1882425	1799459
P4	HUVEC	H004-A	89	T23C1	7140330	7140569	5198764	4790837
P4	HUVEC	H013-A	85	T23C1	5497246	5497443	3832073	3555611
P4	HUVEC	H288-L	93	T23C1	2700716	2700810	1917140	1830108
P4	HUVEC	H004-A	17	T2C1	5791160	5791338	4072268	3735278
P4	HUVEC	H013-A	13	T2C1	4530420	4530571	3042073	2795240
P4	HUVEC	H288-L	21	T2C1	1920148	1920212	1334120	1195873
P4	HUVEC	H004-A	29	T3C1	2540096	2540192	1771458	1674990
P4	HUVEC	H013-A	25	T3C1	4429094	4429212	3030215	2797249
P4	HUVEC	H288-L	33	T3C1	7756600	7756831	5413514	4883653
P4	HUVEC	H004-A	41	T4C1	114244	114248	76743	75123
P4	HUVEC	H013-A	37	T4C1	5872822	5872996	3968479	3613210
P4	HUVEC	H288-L	45	T4C1	8035632	8035886	5268255	4594599
P4	HUVEC	H004-A	53	T5C1	3945594	3945719	2789677	2568994
P4	HUVEC	H013-A	49	T5C1	5571460	5571639	3768344	3351836
P4	HUVEC	H288-L	57	T5C1	6811312	6811516	4350891	3853481
P4	HUVEC	H004-A	65	T6C1	5316576	5316733	2501521	2334904
P4	HUVEC	H013-A	61	T6C1	3780918	3781043	2583299	2430096
P4	HUVEC	H288-L	69	T6C1	3004806	3004880	2084513	1971928
P4	HUVEC	H004-A	77	T7C1	5448256	5448440	3963340	3663891
P4	HUVEC	H013-A	73	T7C1	7295610	7295855	4697188	4128690
P4	HUVEC	H288-L	81	T7C1	2909726	2909820	2075359	1984339
P4	HUVEC	H004-A	6	T9C1	8929962	8930228	6524744	6039661
P4	HUVEC	H013-A	2	T9C1	4384032	4384173	3005270	2810717
P4	HUVEC	H288-L	10	T9C1	2750698	2750778	1943217	1861295
P5	PBMC	KP39334	64	CO1	2191400	2191471	1533637	1436799
P5	PBMC	KP39334	76	CO1	3718460	3718567	2688236	2488942
P5	PBMC	KP39334	88	CO1	2221630	2221699	1637012	1538160
P5	PBMC	KP39346	68	CO1	3560740	3560907	2658710	2529868
P5	PBMC	KP39346	80	CO1	4355356	4355538	3226945	3045800
P5	PBMC	KP39346	92	CO1	3103786	3103929	2333201	2225937
P5	PBMC	KP39351	72	CO1	5596194	5596395	4092761	3788234
P5	PBMC	KP39351	84	CO1	3608196	3608338	2605128	2416358
P5	PBMC	KP39351	96	CO1	4208718	4208907	3136225	2916147
P5	PBMC	KP39334	28	CO2	4983282	4983433	3537572	3234227
P5	PBMC	KP39334	40	CO2	3952142	3952245	2832474	2614479
P5	PBMC	KP39334	52	CO2	3203802	3203900	2289973	2147189
P5	PBMC	KP39346	32	CO2	4389918	4390103	3416181	3249993
P5	PBMC	KP39346	44	CO2	4548606	4548809	3412035	3225527
P5	PBMC	KP39346	56	CO2	3969510	3969668	3045127	2884117
P5	PBMC	KP39351	36	CO2	4396988	4397185	3179599	2977031
P5	PBMC	KP39351	48	CO2	4365598	4365797	3220920	3010732
P5	PBMC	KP39351	60	CO2	3662848	3662998	2642535	2484709
P5	PBMC	KP39334	85	T16C2	3169892	3170019	2269733	2113186
P5	PBMC	KP39346	89	T16C2	3343772	3343921	2516796	2404317
P5	PBMC	KP39351	93	T16C2	3970470	3970653	2951779	2776190
P5	PBMC	KP39334	16	T17C2	4499876	4500009	3078580	2765519
P5	PBMC	KP39346	20	T17C2	3679136	3679324	2713382	2567775
P5	PBMC	KP39351	24	T17C2	5709508	5709751	4177930	3854677
P5	PBMC	KP39334	1	T24C1	3552676	3552811	2571232	2408963
P5	PBMC	KP39346	5	T24C1	3171846	3171991	2397261	2301136
P5	PBMC	KP39351	9	T24C1	4230762	4230951	3087330	2891857
P5	PBMC	KP39334	13	T25C1	4264088	4264226	3054201	2819370
P5	PBMC	KP39346	17	T25C1	4514384	4514555	3418502	3253908
P5	PBMC	KP39351	21	T25C1	4822004	4822196	3664856	3438603
P5	PBMC	KP39334	25	T26C1	2949582	2949685	2081772	1944854
P5	PBMC	KP39346	29	T26C1	3067828	3067950	2316309	2218649
P5	PBMC	KP39351	33	T26C1	5226170	5226390	4063668	3854718
P5	PBMC	KP39334	37	T27C1	2931876	2931959	2058364	1932239
P5	PBMC	KP39346	41	T27C1	3781734	3781882	2915813	2772230
P5	PBMC	KP39351	45	T27C1	5437740	5437936	4153112	3891409
P5	PBMC	KP39334	49	T28C1	4981262	4981430	3338925	3057439
P5	PBMC	KP39346	53	T28C1	4803510	4803717	3612773	3431786
P5	PBMC	KP39351	57	T28C1	6724880	6725198	4993829	4653487
P5	PBMC	KP39334	61	T29C1	2865904	2866005	2095999	1975587
P5	PBMC	KP39346	65	T29C1	4051664	4051823	3046892	2906502
P5	PBMC	KP39351	69	T29C1	5392598	5392854	3971634	3694590
P5	PBMC	KP39334	73	T30C1	2835756	2835855	1897635	1764118
P5	PBMC	KP39346	77	T30C1	2918012	2918117	2196780	2098544
P5	PBMC	KP39351	81	T30C1	6074142	6074404	4428231	4092021
P5	PBMC	KP39334	2	T32C1	4483204	4483352	3242846	2979107
P5	PBMC	KP39346	6	T32C1	3096454	3096576	2383711	2287534
P5	PBMC	KP39351	10	T32C1	3967492	3967676	2882847	2724888
P5	PBMC	KP39334	14	T33C1	3774204	3774316	2619715	2420097
P5	PBMC	KP39346	18	T33C1	4506098	4506290	3324292	3131882
P5	PBMC	KP39351	22	T33C1	5272730	5272951	3846500	3569084
P5	PBMC	KP39334	26	T34C1	4236394	4236537	3113111	2839418
P5	PBMC	KP39346	30	T34C1	4655992	4656195	3542455	3366083
P5	PBMC	KP39351	34	T34C1	3405958	3406082	2584716	2461097
P5	PBMC	KP39334	38	T35C1	3821734	3821852	2838956	2654231
P5	PBMC	KP39346	42	T35C1	5157266	5157468	3928132	3712282
P5	PBMC	KP39351	46	T35C1	7417578	7417885	4629648	4287587
P5	PBMC	KP39334	50	T36C1	4025586	4025737	2929662	2684536
P5	PBMC	KP39346	54	T36C1	3571570	3571721	2651476	2517698
P5	PBMC	KP39351	58	T36C1	5600928	5601161	3968600	3684197
P5	PBMC	KP39334	62	T37C1	3623878	3624009	2578847	2384408
P5	PBMC	KP39346	66	T37C1	4721008	4721202	3097595	2916798
P5	PBMC	KP39351	70	T37C1	4102812	4102979	2883694	2688652
P5	PBMC	KP39334	74	T38C1	3469626	3469748	2547868	2242477
P5	PBMC	KP39346	78	T38C1	3798030	3798167	2889446	2740650
P5	PBMC	KP39351	82	T38C1	3616008	3616173	2540681	2374624
P5	PBMC	KP39334	86	T39C1	4324900	4325062	2977896	2687106
P5	PBMC	KP39346	90	T39C1	4036156	4036368	3026130	2862823
P5	PBMC	KP39351	94	T39C1	6370602	6370904	4686704	4293994
P5	PBMC	KP39334	3	T40C1	3331244	3331345	2456416	2266976
P5	PBMC	KP39346	7	T40C1	5171228	5171456	3887123	3670346
P5	PBMC	KP39351	11	T40C1	14697256	14697907	10731534	9521939
P5	PBMC	KP39334	15	T41C1	4418258	4418396	3172314	2877463
P5	PBMC	KP39346	19	T41C1	5560150	5560366	4177190	3911544
P5	PBMC	KP39351	23	T41C1	6704976	6705264	4832177	4434474
P5	PBMC	KP39334	27	T42C1	4165524	4165649	2955996	2666519
P5	PBMC	KP39346	31	T42C1	3143312	3143445	2358022	2233668
P5	PBMC	KP39351	35	T42C1	6656656	6656898	4969665	4564058
P5	PBMC	KP39334	39	T43C1	3600936	3601047	2571528	2354231
P5	PBMC	KP39346	43	T43C1	6732366	6732627	5156640	4865198
P5	PBMC	KP39351	47	T43C1	5910264	5910483	4419158	4160633
P5	PBMC	KP39334	51	T44C1	4638878	4639018	2992957	2719065
P5	PBMC	KP39346	55	T44C1	4128728	4128899	3075597	2922447
P5	PBMC	KP39351	59	T44C1	4311154	4311339	3189150	2977185
P5	PBMC	KP39334	63	T45C1	4746334	4746479	3668210	3423542
P5	PBMC	KP39346	67	T45C1	5219298	5219509	3780494	3551229
P5	PBMC	KP39351	71	T45C1	5196002	5196206	3867459	3579389
P5	PBMC	KP39334	75	T46C1	4173444	4173585	3013584	2741321
P5	PBMC	KP39346	79	T46C1	5440598	5440847	4042710	3789407
P5	PBMC	KP39351	83	T46C1	3808856	3809016	2768914	2583376
P5	PBMC	KP39334	87	T47C1	3859842	3860008	2764794	2504029
P5	PBMC	KP39346	91	T47C1	2043192	2043279	1486551	1417052
P5	PBMC	KP39351	95	T47C1	5338646	5338901	3897158	3573486
P5	PBMC	KP39334	4	T48C1	3319572	3319690	2437263	2259300
P5	PBMC	KP39346	8	T48C1	4275026	4275219	3264524	3109271
P5	PBMC	KP39351	12	T48C1	3813308	3813498	2731616	2551546
P6	PBMC	KP39334	4	CO1	8541590	8541590	5687375	5337988
P6	PBMC	KP39334	16	CO1	8186092	8186092	5088494	4755414
P6	PBMC	KP39334	87	CO1	8651538	8651538	6039941	5687547
P6	PBMC	KP39346	8	CO1	7530536	7530536	4957933	4667952
P6	PBMC	KP39346	20	CO1	6396122	6396122	4255687	4044148
P6	PBMC	KP39346	91	CO1	4131368	4131368	2772591	2633016
P6	PBMC	KP39351	12	CO1	11940520	11940520	7859436	7122639
P6	PBMC	KP39351	24	CO1	13159948	13159948	8742119	7893658
P6	PBMC	KP39351	95	CO1	9459658	9459658	6368287	5862156
P6	PBMC	KP39334	28	CO2	8052310	8052310	5064888	4772839
P6	PBMC	KP39334	40	CO2	7137242	7137242	4836123	4575890
P6	PBMC	KP39334	52	CO2	7220228	7220228	4879406	4620259
P6	PBMC	KP39346	32	CO2	4748904	4748904	3185811	3051674
P6	PBMC	KP39346	44	CO2	5008256	5008256	3406094	3259092
P6	PBMC	KP39346	56	CO2	4829592	4829592	3307933	3167937
P6	PBMC	KP39351	36	CO2	21102584	21102584	13927704	11859916
P6	PBMC	KP39351	48	CO2	13652952	13652952	9177524	8345996
P6	PBMC	KP39351	60	CO2	9581712	9581712	6325867	5770574
P6	PBMC	KP39334	64	CO3	4750510	4750510	3016453	2879587
P6	PBMC	KP39334	76	CO3	8804476	8804476	5594344	5269719
P6	PBMC	KP39334	88	CO3	4918144	4918144	3346489	3195408
P6	PBMC	KP39346	68	CO3	5772366	5772366	3910652	3724411
P6	PBMC	KP39346	80	CO3	7419480	7419480	4955164	4668273
P6	PBMC	KP39346	92	CO3	4365238	4365238	2904984	2778024
P6	PBMC	KP39351	72	CO3	15155344	15155344	10141944	9229319
P6	PBMC	KP39351	84	CO3	7882300	7882300	5243393	4859676
P6	PBMC	KP39334	26	T10C1	11175374	11175374	7542446	6971369
P6	PBMC	KP39346	30	T10C1	6481644	6481644	4302268	4078027
P6	PBMC	KP39351	34	T10C1	10718122	10718122	7278371	6706714
P6	PBMC	KP39334	14	T10C2	9392694	9392694	6480696	6063186
P6	PBMC	KP39346	18	T10C2	5487830	5487830	3607000	3440861
P6	PBMC	KP39351	22	T10C2	11980440	11980440	8056948	7427538
P6	PBMC	KP39334	38	T11C1	7403132	7403132	4843737	4585440
P6	PBMC	KP39346	42	T11C1	6000350	6000350	3890703	3700894
P6	PBMC	KP39351	46	T11C1	10945644	10945644	7390400	6832145
P6	PBMC	KP39334	50	T12C1	12942206	12942206	8853007	8122346
P6	PBMC	KP39346	54	T12C1	6277664	6277664	4024024	3822714
P6	PBMC	KP39351	58	T12C1	9173634	9173634	5810750	5407033
P6	PBMC	KP39334	62	T13C1	11090762	11090762	7735644	7217491
P6	PBMC	KP39346	66	T13C1	5826662	5826662	3743482	3551184
P6	PBMC	KP39351	70	T13C1	13085214	13085214	8936992	8037957
P6	PBMC	KP39334	74	T14C1	10085886	10085886	6729373	6103284
P6	PBMC	KP39346	78	T14C1	8208808	8208808	5140664	4867352
P6	PBMC	KP39351	82	T14C1	10812710	10812710	7166555	6562303
P6	PBMC	KP39334	86	T15C1	11392512	11392512	7604697	7072662
P6	PBMC	KP39346	90	T15C1	8665886	8665886	5769190	5413944
P6	PBMC	KP39351	94	T15C1	10594850	10594850	6945481	6317997
P6	PBMC	KP39334	3	T16C1	12484564	12484564	8746302	7918359
P6	PBMC	KP39346	7	T16C1	4330546	4330546	2856847	2736350
P6	PBMC	KP39351	11	T16C1	8645548	8645548	5911965	5502236
P6	PBMC	KP39334	15	T17C1	11703948	11703948	8270555	7566044
P6	PBMC	KP39346	19	T17C1	7499336	7499336	5448733	5199236
P6	PBMC	KP39351	23	T17C1	13531134	13531134	9644693	8897061
P6	PBMC	KP39334	27	T18C1	9916446	9916446	6879631	6362428
P6	PBMC	KP39346	31	T18C1	3970344	3970344	2475724	2376940
P6	PBMC	KP39351	35	T18C1	14605636	14605636	8994575	8246194
P6	PBMC	KP39334	39	T19C1	8575028	8575028	5996813	5697789
P6	PBMC	KP39346	43	T19C1	6746760	6746760	4518381	4305007
P6	PBMC	KP39351	47	T19C1	15535246	15535246	9227887	8249275
P6	PBMC	KP39334	1	T1C1	7498874	7498874	5251575	4983184
P6	PBMC	KP39346	5	T1C1	5466424	5466424	3894979	3719520
P6	PBMC	KP39351	9	T1C1	7117662	7117662	4867696	4587302
P6	PBMC	KP39334	51	T20C1	9847682	9847682	6720065	6172053
P6	PBMC	KP39346	55	T20C1	8207690	8207690	5557194	5250591
P6	PBMC	KP39351	59	T20C1	9313648	9313648	6086805	5591970
P6	PBMC	KP39334	63	T21C1	8936008	8936008	6480314	6150528
P6	PBMC	KP39346	67	T21C1	6696936	6696936	4162892	3969084
P6	PBMC	KP39351	71	T21C1	12696486	12696486	8812647	8126120
P6	PBMC	KP39334	75	T22C1	7097266	7097266	4904162	4634930
P6	PBMC	KP39346	79	T22C1	9332086	9332086	6247785	5879593
P6	PBMC	KP39351	83	T22C1	9876084	9876084	6574665	6085840
P6	PBMC	KP39334	85	T23C1	9472454	9472454	6244340	5701073
P6	PBMC	KP39346	89	T23C1	32808804	32808804	23049600	20109903
P6	PBMC	KP39351	93	T23C1	7442276	7442276	5399751	5036044
P6	PBMC	KP39334	13	T2C1	10425560	10425560	7031256	6552137
P6	PBMC	KP39346	17	T2C1	6387878	6387878	4349721	4159055
P6	PBMC	KP39351	21	T2C1	5862642	5862642	3943022	3731501
P6	PBMC	KP39334	25	T3C1	9056046	9056046	6277852	5934657
P6	PBMC	KP39346	29	T3C1	7223206	7223206	4431345	4244702
P6	PBMC	KP39351	33	T3C1	4201186	4201186	2807164	2677473
P6	PBMC	KP39334	37	T4C1	9844406	9844406	6785959	6305315
P6	PBMC	KP39346	41	T4C1	6666880	6666880	4616952	4360704
P6	PBMC	KP39351	45	T4C1	5382098	5382098	3553060	3369806
P6	PBMC	KP39334	49	T5C1	21067956	21067956	14273417	12625186
P6	PBMC	KP39346	53	T5C1	8021784	8021784	5379790	5052662
P6	PBMC	KP39351	57	T5C1	9027770	9027770	5472705	5157466
P6	PBMC	KP39334	61	T6C1	9212690	9212690	6433280	5979347
P6	PBMC	KP39346	65	T6C1	9143504	9143504	6227000	5879300
P6	PBMC	KP39351	69	T6C1	5751338	5751338	3835477	3634406
P6	PBMC	KP39334	73	T7C1	8564970	8564970	5943824	5585296
P6	PBMC	KP39346	77	T7C1	18075636	18075636	12323787	11352140
P6	PBMC	KP39351	81	T7C1	9446528	9446528	6443557	5964739
P6	PBMC	KP39334	2	T9C1	10448482	10448482	7227955	6738259
P6	PBMC	KP39346	6	T9C1	6908766	6908766	4558786	4308151
P6	PBMC	KP39351	10	T9C1	12316436	12316436	8177982	7555169
P7	LCL	GM18507	64	CO1	2547416	2547485	1713443	1579113
P7	LCL	GM18507	76	CO1	5381496	5381635	3615037	3260011
P7	LCL	GM18507	88	CO1	4673240	4673360	3110951	2801381
P7	LCL	GM18508	68	CO1	2319072	2319161	1552735	1429386
P7	LCL	GM18508	80	CO1	2091588	2091648	1405467	1298674
P7	LCL	GM18508	92	CO1	2255936	2256019	1481091	1357362
P7	LCL	GM19239	72	CO1	5483878	5484021	3406552	2993323
P7	LCL	GM19239	84	CO1	2599118	2599192	1605802	1442240
P7	LCL	GM19239	96	CO1	2703076	2703153	1666264	1494240
P7	LCL	GM18507	28	CO2	3615024	3615120	2398757	2184329
P7	LCL	GM18507	40	CO2	4919280	4919408	3237266	2907946
P7	LCL	GM18507	52	CO2	4226732	4226852	2804989	2546503
P7	LCL	GM18508	32	CO2	2449352	2449429	1646041	1517030
P7	LCL	GM18508	44	CO2	2485054	2485122	1666711	1531496
P7	LCL	GM18508	56	CO2	2516120	2516171	1662195	1524026
P7	LCL	GM19239	36	CO2	3001094	3001165	1942550	1761415
P7	LCL	GM19239	48	CO2	5978114	5978267	3772729	3311636
P7	LCL	GM19239	60	CO2	4124648	4124786	2595117	2305018
P7	LCL	GM18507	85	T16C2	4928600	4928755	2892333	2540901
P7	LCL	GM18508	89	T16C2	7405488	7405701	4925941	4330078
P7	LCL	GM19239	93	T16C2	4463428	4463535	2916943	2613106
P7	LCL	GM18507	16	T17C2	3164698	3164787	2153482	1984743
P7	LCL	GM18508	20	T17C2	272034	272045	188175	179200
P7	LCL	GM19239	24	T17C2	3082504	3082584	1952864	1761017
P7	LCL	GM18507	1	T24C1	3475430	3475544	2211081	2010902
P7	LCL	GM18508	5	T24C1	2447860	2447938	1618408	1489365
P7	LCL	GM19239	9	T24C1	3544592	3544679	2281759	2051065
P7	LCL	GM18507	13	T25C1	3594294	3594383	2227279	2005950
P7	LCL	GM18508	17	T25C1	7288966	7289197	4822318	4222296
P7	LCL	GM19239	21	T25C1	4650212	4650341	3037395	2719959
P7	LCL	GM18507	25	T26C1	4226612	4226724	2627376	2348457
P7	LCL	GM18508	29	T26C1	3526752	3526860	2327917	2096767
P7	LCL	GM19239	33	T26C1	3299368	3299459	2085296	1870828
P7	LCL	GM18507	37	T27C1	11335144	11335416	7197783	6283794
P7	LCL	GM18508	41	T27C1	4373374	4373481	2949703	2654561
P7	LCL	GM19239	45	T27C1	3586532	3586642	2270345	2036947
P7	LCL	GM18507	49	T28C1	4198450	4198560	2624278	2339976
P7	LCL	GM18508	53	T28C1	3856350	3856465	2511826	2250465
P7	LCL	GM19239	57	T28C1	3505410	3505512	2260662	2047520
P7	LCL	GM18507	61	T29C1	4201910	4202026	2676273	2421660
P7	LCL	GM18508	65	T29C1	5256218	5256379	3548891	3198254
P7	LCL	GM19239	69	T29C1	3610196	3610297	2302807	2061562
P7	LCL	GM18507	73	T30C1	5411712	5411878	3338839	2938117
P7	LCL	GM18508	77	T30C1	6175736	6175924	4064185	3572734
P7	LCL	GM19239	81	T30C1	5472934	5473109	3486716	3069922
P7	LCL	GM18507	2	T32C1	3177096	3177182	2148815	2000018
P7	LCL	GM18508	6	T32C1	5478170	5478320	3777697	3416329
P7	LCL	GM19239	10	T32C1	2736424	2736512	1736510	1568159
P7	LCL	GM18507	14	T33C1	3158094	3158188	2133683	1976292
P7	LCL	GM18508	18	T33C1	3995412	3995540	2694041	2444591
P7	LCL	GM19239	22	T33C1	3339734	3339823	2147637	1927955
P7	LCL	GM18507	26	T34C1	4665446	4665592	3182713	2915778
P7	LCL	GM18508	30	T34C1	4134224	4134348	2777265	2505135
P7	LCL	GM19239	34	T34C1	2857672	2857750	1843980	1671787
P7	LCL	GM18507	38	T35C1	8113572	8113827	5505787	4933297
P7	LCL	GM18508	42	T35C1	3522896	3523009	2412114	2209392
P7	LCL	GM19239	46	T35C1	2973996	2974082	1873682	1685038
P7	LCL	GM18507	50	T36C1	4654932	4655056	3208472	2951863
P7	LCL	GM18508	54	T36C1	4588962	4589105	3086712	2782269
P7	LCL	GM19239	58	T36C1	2313820	2313871	1461474	1325215
P7	LCL	GM18507	62	T37C1	5426874	5427029	3681317	3348022
P7	LCL	GM18508	66	T37C1	3755424	3755531	2574344	2356757
P7	LCL	GM19239	70	T37C1	2194728	2194783	1433422	1313087
P7	LCL	GM18507	74	T38C1	4417500	4417623	3007798	2751867
P7	LCL	GM18508	78	T38C1	4646966	4647091	3107153	2787500
P7	LCL	GM19239	82	T38C1	3262564	3262654	2159587	1958307
P7	LCL	GM18507	86	T39C1	5450652	5450822	3616668	3289723
P7	LCL	GM18508	90	T39C1	4988840	4988999	3335892	2995203
P7	LCL	GM19239	94	T39C1	6396776	6396986	4145652	3648572
P7	LCL	GM18507	3	T40C1	3308172	3308270	2218608	2052487
P7	LCL	GM18508	7	T40C1	2141884	2141946	1419374	1317989
P7	LCL	GM19239	11	T40C1	3842002	3842109	2365872	2091273
P7	LCL	GM18507	15	T41C1	12131956	12132336	8286796	7323675
P7	LCL	GM18508	19	T41C1	3689552	3689659	2463443	2238545
P7	LCL	GM19239	23	T41C1	4013736	4013843	2531841	2246056
P7	LCL	GM18507	27	T42C1	5799280	5799452	3929888	3551546
P7	LCL	GM18508	31	T42C1	2106378	2106424	1316335	1189800
P7	LCL	GM19239	35	T42C1	3352604	3352709	2106042	1884278
P7	LCL	GM18507	39	T43C1	5557694	5557862	3825684	3491891
P7	LCL	GM18508	43	T43C1	3293772	3293890	2217111	2035122
P7	LCL	GM19239	47	T43C1	2934070	2934143	1947182	1784403
P7	LCL	GM18507	51	T44C1	5207576	5207733	3628505	3332854
P7	LCL	GM18508	55	T44C1	2810382	2810481	1896044	1757936
P7	LCL	GM19239	59	T44C1	1399988	1400035	883469	814327
P7	LCL	GM18507	63	T45C1	4487562	4487675	3151606	2896814
P7	LCL	GM18508	67	T45C1	10066604	10066892	6731656	5843929
P7	LCL	GM19239	71	T45C1	2005946	2006009	1249912	1136211
P7	LCL	GM18507	75	T46C1	4190060	4190178	2911188	2687519
P7	LCL	GM18508	79	T46C1	5126194	5126337	3444406	3095356
P7	LCL	GM19239	83	T46C1	3077994	3078084	1894096	1687304
P7	LCL	GM18507	87	T47C1	4446930	4447055	3017803	2769517
P7	LCL	GM18508	91	T47C1	1795574	1795620	1221468	1138734
P7	LCL	GM19239	95	T47C1	1920866	1920917	1209496	1099829
P7	LCL	GM18507	4	T48C1	4628112	4628243	3098663	2834077
P7	LCL	GM18508	8	T48C1	3020096	3020167	2077561	1870326
P7	LCL	GM19239	12	T48C1	1970758	1970804	1249731	1142128
P8	HUVEC	H004-A	68	CO1	6342588	6342797	4125711	3751009
P8	HUVEC	H004-A	80	CO1	7073146	7073382	4744724	4278811
P8	HUVEC	H004-A	92	CO1	4079834	4079951	2786984	2568021
P8	HUVEC	H013-A	64	CO1	3061166	3061280	1898279	1778023
P8	HUVEC	H013-A	76	CO1	8600166	8600425	5224316	4723750
P8	HUVEC	H013-A	88	CO1	5115922	5116105	3439532	3167328
P8	HUVEC	H288-L	72	CO1	7794734	7795001	5141235	4607345
P8	HUVEC	H288-L	84	CO1	4463782	4463963	3050186	2811368
P8	HUVEC	H288-L	96	CO1	6549708	6549927	4370569	3923068
P8	HUVEC	H004-A	32	CO2	5591492	5591663	3728922	3410311
P8	HUVEC	H004-A	44	CO2	4652156	4652302	3007449	2749104
P8	HUVEC	H004-A	56	CO2	6046776	6046971	4040023	3703691
P8	HUVEC	H013-A	28	CO2	7231234	7231460	4550655	4146951
P8	HUVEC	H013-A	40	CO2	4823952	4824136	2880712	2623125
P8	HUVEC	H013-A	52	CO2	7411990	7412252	4025169	3690579
P8	HUVEC	H288-L	36	CO2	4274758	4274893	2781511	2554619
P8	HUVEC	H288-L	48	CO2	4664108	4664258	3060280	2794982
P8	HUVEC	H288-L	60	CO2	2837290	2837369	1868065	1734304
P8	HUVEC	H004-A	89	T16C2	4879584	4879734	3039992	2810796
P8	HUVEC	H013-A	85	T16C2	4506132	4506287	3259669	3070262
P8	HUVEC	H288-L	93	T16C2	4780056	4780220	3248916	2969325
P8	HUVEC	H004-A	20	T17C2	5667932	5668124	3486651	3140689
P8	HUVEC	H013-A	16	T17C2	5352512	5352691	3118140	2843364
P8	HUVEC	H288-L	24	T17C2	5228024	5228164	3162178	2869043
P8	HUVEC	H004-A	5	T24C1	4658418	4658558	3184327	2953051
P8	HUVEC	H013-A	1	T24C1	4173426	4173562	2915906	2737294
P8	HUVEC	H288-L	9	T24C1	5572974	5573149	3857523	3547016
P8	HUVEC	H004-A	17	T25C1	5048734	5048878	3345824	3088285
P8	HUVEC	H013-A	13	T25C1	5009568	5009707	3464548	3223225
P8	HUVEC	H288-L	21	T25C1	7301242	7301480	4801134	4320389
P8	HUVEC	H004-A	29	T26C1	4071936	4072086	2702350	2515598
P8	HUVEC	H013-A	25	T26C1	4531500	4531630	3060399	2857408
P8	HUVEC	H288-L	33	T26C1	6711528	6711705	4525316	4114157
P8	HUVEC	H004-A	41	T27C1	4979760	4979913	3193612	2942481
P8	HUVEC	H013-A	37	T27C1	2706796	2706870	1794554	1691323
P8	HUVEC	H288-L	45	T27C1	6775994	6776215	4536705	4116529
P8	HUVEC	H004-A	53	T28C1	4473334	4473472	2967323	2749813
P8	HUVEC	H013-A	49	T28C1	4533724	4533867	3104943	2886724
P8	HUVEC	H288-L	57	T28C1	6950908	6951136	4519711	4090319
P8	HUVEC	H004-A	65	T29C1	5005934	5006100	3237171	3007332
P8	HUVEC	H013-A	61	T29C1	2831214	2831296	1980047	1873259
P8	HUVEC	H288-L	69	T29C1	9678150	9678497	6571013	5878973
P8	HUVEC	H004-A	77	T30C1	4523300	4523446	2771875	2554025
P8	HUVEC	H013-A	73	T30C1	4963074	4963230	3534124	3308332
P8	HUVEC	H288-L	81	T30C1	8152792	8153060	5398780	4837555
P8	HUVEC	H004-A	6	T32C1	6078596	6078791	4055683	3704609
P8	HUVEC	H013-A	2	T32C1	6205846	6206051	4084110	3731362
P8	HUVEC	H288-L	10	T32C1	4598856	4599002	3063123	2826011
P8	HUVEC	H004-A	18	T33C1	5055000	5055160	3063371	2771651
P8	HUVEC	H013-A	14	T33C1	5635296	5635487	3435600	3121448
P8	HUVEC	H288-L	22	T33C1	5763972	5764161	3674489	3327741
P8	HUVEC	H004-A	30	T34C1	5573248	5573434	3609500	3296280
P8	HUVEC	H013-A	26	T34C1	5288614	5288765	3463034	3165401
P8	HUVEC	H288-L	34	T34C1	4837570	4837741	3166905	2882985
P8	HUVEC	H004-A	42	T35C1	5922286	5922489	3724285	3399385
P8	HUVEC	H013-A	38	T35C1	5455978	5456172	3492807	3191809
P8	HUVEC	H288-L	46	T35C1	2842852	2842947	1742310	1614567
P8	HUVEC	H004-A	54	T36C1	7881536	7881799	5191152	4663443
P8	HUVEC	H013-A	50	T36C1	7983098	7983384	5310384	4834197
P8	HUVEC	H288-L	58	T36C1	4356390	4356508	2874226	2635970
P8	HUVEC	H004-A	66	T37C1	5227426	5227613	3219069	2946877
P8	HUVEC	H013-A	62	T37C1	5606056	5606258	3758769	3464360
P8	HUVEC	H288-L	70	T37C1	4810184	4810311	2766690	2483099
P8	HUVEC	H004-A	78	T38C1	7756754	7756985	5097685	4593008
P8	HUVEC	H013-A	74	T38C1	6581258	6581460	4438034	4046279
P8	HUVEC	H288-L	82	T38C1	4969068	4969236	3173331	2878376
P8	HUVEC	H004-A	90	T39C1	6415738	6415950	4286605	3877589
P8	HUVEC	H013-A	86	T39C1	7497372	7497621	4992549	4536515
P8	HUVEC	H288-L	94	T39C1	4033754	4033871	2576832	2357684
P8	HUVEC	H004-A	7	T40C1	4840436	4840577	3218037	2964619
P8	HUVEC	H013-A	3	T40C1	6175018	6175215	4304603	3998559
P8	HUVEC	H288-L	11	T40C1	5364574	5364746	3532020	3206201
P8	HUVEC	H004-A	19	T41C1	4908860	4909015	3257904	2987315
P8	HUVEC	H013-A	15	T41C1	5331934	5332105	3684089	3431405
P8	HUVEC	H288-L	23	T41C1	4133214	4133384	2712361	2495185
P8	HUVEC	H004-A	31	T42C1	5490100	5490299	3521250	3192902
P8	HUVEC	H013-A	27	T42C1	4697684	4697823	3169943	2940368
P8	HUVEC	H288-L	35	T42C1	5256760	5256917	3415433	3102170
P8	HUVEC	H004-A	43	T43C1	6111010	6111198	3542274	3233583
P8	HUVEC	H013-A	39	T43C1	4703854	4704014	3178243	2973915
P8	HUVEC	H288-L	47	T43C1	3856992	3857139	2426583	2249573
P8	HUVEC	H004-A	55	T44C1	5217850	5218027	3299898	3046517
P8	HUVEC	H013-A	51	T44C1	4316058	4316170	2571825	2403448
P8	HUVEC	H288-L	59	T44C1	3574998	3575106	2301772	2117119
P8	HUVEC	H004-A	67	T45C1	6718238	6718425	3220421	2938903
P8	HUVEC	H013-A	63	T45C1	4923348	4923489	3356576	3116644
P8	HUVEC	H288-L	71	T45C1	4364092	4364239	2818697	2577121
P8	HUVEC	H004-A	79	T46C1	8336130	8336420	5437936	4899846
P8	HUVEC	H013-A	75	T46C1	5291276	5291453	3640575	3363364
P8	HUVEC	H288-L	83	T46C1	4246640	4246812	2890691	2667853
P8	HUVEC	H004-A	91	T47C1	2823442	2823533	1956203	1826200
P8	HUVEC	H013-A	87	T47C1	4940672	4940851	3481307	3242279
P8	HUVEC	H288-L	95	T47C1	4995876	4996023	3340483	3055257
P8	HUVEC	H004-A	8	T48C1	5830220	5830423	3863989	3522514
P8	HUVEC	H013-A	4	T48C1	6477722	6477955	4265746	3891261
P8	HUVEC	H288-L	12	T48C1	5907856	5908032	3753357	3421905
P9	SMC	SM046-A	4	CO1	10244234	10244234	6006402	5334168
P9	SMC	SM046-A	16	CO1	9451496	9451496	5284717	4679891
P9	SMC	SM046-A	87	CO1	11477352	11477352	6642163	5813957
P9	SMC	SM050-A	8	CO1	12288594	12288594	7743545	6793901
P9	SMC	SM050-A	20	CO1	9918236	9918236	6066458	5371425
P9	SMC	SM050-A	91	CO1	13067702	13067702	7875025	6758916
P9	SMC	SM794-L	12	CO1	8138858	8138858	4929627	4381059
P9	SMC	SM794-L	24	CO1	7684998	7684998	4664354	4147681
P9	SMC	SM794-L	95	CO1	7868140	7868140	4983630	4438181
P9	SMC	SM046-A	28	CO2	7990216	7990216	4539600	4010774
P9	SMC	SM046-A	40	CO2	9074152	9074152	5007491	4426149
P9	SMC	SM046-A	52	CO2	8467726	8467726	4565220	4029600
P9	SMC	SM050-A	32	CO2	12660216	12660216	7830345	6873188
P9	SMC	SM050-A	44	CO2	12886684	12886684	7906175	6901499
P9	SMC	SM050-A	56	CO2	11528326	11528326	7164795	6337195
P9	SMC	SM794-L	36	CO2	7318652	7318652	4452854	3961998
P9	SMC	SM794-L	48	CO2	7020242	7020242	4305794	3848278
P9	SMC	SM794-L	60	CO2	6811558	6811558	4171079	3720749
P9	SMC	SM046-A	64	CO3	11362498	11362498	6143726	5329961
P9	SMC	SM046-A	76	CO3	9852248	9852248	5156683	4485510
P9	SMC	SM046-A	88	CO3	9578300	9578300	5467555	4814448
P9	SMC	SM050-A	68	CO3	10517670	10517670	6535542	5790025
P9	SMC	SM050-A	80	CO3	9365614	9365614	5845458	5198256
P9	SMC	SM050-A	92	CO3	8296154	8296154	5160569	4612796
P9	SMC	SM794-L	72	CO3	6743936	6743936	4126277	3691450
P9	SMC	SM794-L	84	CO3	6543468	6543468	4091252	3675170
P9	SMC	SM794-L	96	CO3	7565102	7565102	4686657	4197008
P9	SMC	SM046-A	26	T10C1	11292008	11292008	6413179	5638156
P9	SMC	SM050-A	30	T10C1	8600670	8600670	5015478	4444324
P9	SMC	SM794-L	34	T10C1	9047284	9047284	5489207	4831142
P9	SMC	SM046-A	14	T10C2	12059956	12059956	6981592	6213765
P9	SMC	SM050-A	18	T10C2	8952656	8952656	5293744	4689245
P9	SMC	SM794-L	22	T10C2	7339602	7339602	4474393	3996709
P9	SMC	SM046-A	38	T11C1	9655230	9655230	5318041	4674141
P9	SMC	SM050-A	42	T11C1	7155190	7155190	4225180	3788287
P9	SMC	SM794-L	46	T11C1	8677048	8677048	5333905	4753450
P9	SMC	SM046-A	50	T12C1	11411602	11411602	6406677	5639031
P9	SMC	SM050-A	54	T12C1	8839316	8839316	5170907	4612468
P9	SMC	SM794-L	58	T12C1	6917106	6917106	4306241	3855926
P9	SMC	SM046-A	62	T13C1	11559190	11559190	6657570	5883483
P9	SMC	SM050-A	66	T13C1	8629174	8629174	4975148	4439149
P9	SMC	SM794-L	70	T13C1	14241840	14241840	8878365	7653973
P9	SMC	SM046-A	74	T14C1	11621866	11621866	6306438	5460076
P9	SMC	SM050-A	78	T14C1	8786232	8786232	5287452	4700497
P9	SMC	SM794-L	82	T14C1	6077296	6077296	3807068	3430839
P9	SMC	SM046-A	86	T15C1	11994922	11994922	6743867	5863937
P9	SMC	SM050-A	90	T15C1	8124260	8124260	4942910	4413724
P9	SMC	SM794-L	94	T15C1	6880410	6880410	4346046	3900831
P9	SMC	SM046-A	3	T16C1	12446270	12446270	7586893	6677652
P9	SMC	SM050-A	7	T16C1	11160734	11160734	6997753	6265880
P9	SMC	SM794-L	11	T16C1	7721088	7721088	5204905	4732378
P9	SMC	SM046-A	15	T17C1	13295586	13295586	8228774	7064468
P9	SMC	SM050-A	19	T17C1	16628584	16628584	9754731	8281207
P9	SMC	SM794-L	23	T17C1	10074026	10074026	6158842	5423330
P9	SMC	SM046-A	27	T18C1	11271290	11271290	6422404	5616171
P9	SMC	SM050-A	31	T18C1	10649238	10649238	6307543	5526580
P9	SMC	SM794-L	35	T18C1	7089218	7089218	4292597	3833629
P9	SMC	SM046-A	39	T19C1	11251264	11251264	6534142	5796713
P9	SMC	SM050-A	43	T19C1	13885912	13885912	8206011	7216716
P9	SMC	SM794-L	47	T19C1	7721608	7721608	4858609	4381045
P9	SMC	SM046-A	1	T1C1	16082922	16082922	9105714	7882261
P9	SMC	SM050-A	5	T1C1	8897820	8897820	5268000	4660764
P9	SMC	SM794-L	9	T1C1	10577174	10577174	6732148	5989592
P9	SMC	SM046-A	51	T20C1	12206162	12206162	6800087	5947728
P9	SMC	SM050-A	55	T20C1	12036914	12036914	7167180	6279171
P9	SMC	SM794-L	59	T20C1	7060672	7060672	4450496	3981169
P9	SMC	SM046-A	63	T21C1	11083350	11083350	7121098	6310966
P9	SMC	SM050-A	67	T21C1	12707244	12707244	7749990	6791093
P9	SMC	SM794-L	71	T21C1	7811494	7811494	4012025	3573191
P9	SMC	SM046-A	75	T22C1	11988254	11988254	6481184	5560320
P9	SMC	SM050-A	79	T22C1	11310260	11310260	6596284	5759183
P9	SMC	SM794-L	83	T22C1	7832322	7832322	4922671	4394516
P9	SMC	SM046-A	85	T23C1	13473476	13473476	7655730	6671302
P9	SMC	SM050-A	89	T23C1	9195448	9195448	5367790	4720742
P9	SMC	SM794-L	93	T23C1	9044554	9044554	5759253	5168398
P9	SMC	SM046-A	13	T2C1	14234956	14234956	8263553	7196795
P9	SMC	SM050-A	17	T2C1	8371158	8371158	4797583	4229236
P9	SMC	SM794-L	21	T2C1	8756834	8756834	5505321	4918657
P9	SMC	SM046-A	25	T3C1	14160464	14160464	7883459	6834776
P9	SMC	SM050-A	29	T3C1	7599742	7599742	4199130	3687209
P9	SMC	SM794-L	33	T3C1	10524682	10524682	6445252	5682789
P9	SMC	SM046-A	37	T4C1	14284984	14284984	7729323	6722628
P9	SMC	SM050-A	41	T4C1	8173690	8173690	4536793	3894321
P9	SMC	SM794-L	45	T4C1	10236088	10236088	6306197	5586874
P9	SMC	SM046-A	49	T5C1	12477470	12477470	6977007	6109140
P9	SMC	SM050-A	53	T5C1	8571262	8571262	4874639	4288390
P9	SMC	SM794-L	57	T5C1	10685444	10685444	6649826	5889531
P9	SMC	SM046-A	61	T6C1	11555194	11555194	6757307	5999621
P9	SMC	SM050-A	65	T6C1	9234948	9234948	5211284	4610156
P9	SMC	SM794-L	69	T6C1	10405858	10405858	6551524	5814838
P9	SMC	SM046-A	73	T7C1	12417708	12417708	6791577	5901345
P9	SMC	SM050-A	77	T7C1	8711136	8711136	4979574	4349579
P9	SMC	SM794-L	81	T7C1	8614764	8614764	5299855	4731034
P9	SMC	SM046-A	2	T9C1	13257106	13257106	7684897	6785198
P9	SMC	SM050-A	6	T9C1	7888624	7888624	4667622	4163779
P9	SMC	SM794-L	10	T9C1	8791254	8791254	5424732	4827162
