# Supplementary material for: High-throughput allele-specific expression across 250 environmental conditions
Source: Genome Res. 2016 Dec;26(12):1627–38. doi: 10.1101/gr.209759.116 (PMC5131815; doi:10.1101/gr.209759.116)
Supplement: Supplemental Material [file supp_gr.209759.116_Supplemental_Table_S3.xlsx]

## Sheet: Sheet1
Plate ID	Cell Type	Treatment ID	Control ID	# DEG
P1	LCL	T10C1	CO3	0
P1	LCL	T10C2	CO2	1
P1	LCL	T11C1	CO2	26
P1	LCL	T12C1	CO2	1800
P1	LCL	T13C1	CO1	3564
P1	LCL	T14C1	CO1	0
P1	LCL	T15C1	CO1	1407
P1	LCL	T16C1	CO1	10652
P1	LCL	T17C1	CO1	12178
P1	LCL	T18C1	CO1	6
P1	LCL	T19C1	CO1	5299
P1	LCL	T1C1	CO1	0
P1	LCL	T20C1	CO1	17
P1	LCL	T21C1	CO3	6120
P1	LCL	T22C1	CO1	8
P1	LCL	T2C1	CO1	0
P1	LCL	T3C1	CO1	0
P1	LCL	T4C1	CO1	0
P1	LCL	T5C1	CO1	15
P1	LCL	T6C1	CO2	3178
P1	LCL	T7C1	CO2	21
P1	LCL	T8C1	CO2	58
P1	LCL	T9C1	CO2	36
P11	Mel	T10C1	CO3	39
P11	Mel	T10C2	CO2	0
P11	Mel	T11C1	CO2	0
P11	Mel	T12C1	CO2	180
P11	Mel	T13C1	CO1	589
P11	Mel	T14C1	CO1	0
P11	Mel	T15C1	CO1	14
P11	Mel	T16C1	CO1	3162
P11	Mel	T17C1	CO1	9906
P11	Mel	T18C1	CO1	45
P11	Mel	T19C1	CO1	333
P11	Mel	T1C1	CO1	3
P11	Mel	T20C1	CO1	0
P11	Mel	T21C1	CO3	5792
P11	Mel	T22C1	CO1	14
P11	Mel	T23C1	CO2	743
P11	Mel	T2C1	CO1	0
P11	Mel	T3C1	CO1	0
P11	Mel	T4C1	CO1	0
P11	Mel	T5C1	CO1	0
P11	Mel	T6C1	CO2	346
P11	Mel	T7C1	CO2	247
P11	Mel	T9C1	CO2	1
P12	Mel	T16C2	CO1	0
P12	Mel	T17C2	CO1	0
P12	Mel	T24C1	CO1	27
P12	Mel	T25C1	CO2	0
P12	Mel	T26C1	CO1	0
P12	Mel	T27C1	CO1	0
P12	Mel	T28C1	CO1	2
P12	Mel	T29C1	CO1	0
P12	Mel	T30C1	CO2	188
P12	Mel	T32C1	CO1	0
P12	Mel	T33C1	CO1	571
P12	Mel	T34C1	CO1	0
P12	Mel	T35C1	CO1	0
P12	Mel	T36C1	CO1	0
P12	Mel	T37C1	CO1	2
P12	Mel	T38C1	CO1	0
P12	Mel	T39C1	CO1	87
P12	Mel	T40C1	CO2	250
P12	Mel	T41C1	CO2	277
P12	Mel	T42C1	CO1	808
P12	Mel	T43C1	CO2	86
P12	Mel	T44C1	CO2	2268
P12	Mel	T45C1	CO1	0
P12	Mel	T46C1	CO1	0
P12	Mel	T47C1	CO2	264
P12	Mel	T48C1	CO2	0
P4	HUVEC	T10C1	CO3	0
P4	HUVEC	T10C2	CO2	0
P4	HUVEC	T11C1	CO2	0
P4	HUVEC	T12C1	CO2	441
P4	HUVEC	T13C1	CO1	553
P4	HUVEC	T14C1	CO1	1
P4	HUVEC	T15C1	CO1	4
P4	HUVEC	T16C1	CO1	12978
P4	HUVEC	T17C1	CO1	9961
P4	HUVEC	T18C1	CO1	550
P4	HUVEC	T19C1	CO1	1905
P4	HUVEC	T1C1	CO1	42
P4	HUVEC	T20C1	CO1	20
P4	HUVEC	T21C1	CO3	8763
P4	HUVEC	T22C1	CO1	2
P4	HUVEC	T23C1	CO2	185
P4	HUVEC	T2C1	CO1	0
P4	HUVEC	T3C1	CO1	17
P4	HUVEC	T4C1	CO1	0
P4	HUVEC	T5C1	CO1	0
P4	HUVEC	T6C1	CO2	484
P4	HUVEC	T7C1	CO2	37
P4	HUVEC	T9C1	CO2	19
P5	PBMC	T16C2	CO1	0
P5	PBMC	T17C2	CO1	0
P5	PBMC	T24C1	CO1	0
P5	PBMC	T25C1	CO2	0
P5	PBMC	T26C1	CO1	2
P5	PBMC	T27C1	CO1	191
P5	PBMC	T28C1	CO1	0
P5	PBMC	T29C1	CO1	0
P5	PBMC	T30C1	CO2	1
P5	PBMC	T32C1	CO1	0
P5	PBMC	T33C1	CO1	0
P5	PBMC	T34C1	CO1	0
P5	PBMC	T35C1	CO1	1
P5	PBMC	T36C1	CO1	0
P5	PBMC	T37C1	CO1	270
P5	PBMC	T38C1	CO1	0
P5	PBMC	T39C1	CO1	0
P5	PBMC	T40C1	CO2	208
P5	PBMC	T41C1	CO2	61
P5	PBMC	T42C1	CO1	402
P5	PBMC	T43C1	CO2	1408
P5	PBMC	T44C1	CO2	0
P5	PBMC	T45C1	CO1	46
P5	PBMC	T46C1	CO1	1
P5	PBMC	T47C1	CO2	278
P5	PBMC	T48C1	CO2	7
P7	LCL	T16C2	CO1	1
P7	LCL	T17C2	CO1	0
P7	LCL	T24C1	CO1	305
P7	LCL	T25C1	CO2	6
P7	LCL	T26C1	CO1	112
P7	LCL	T27C1	CO1	530
P7	LCL	T28C1	CO1	44
P7	LCL	T29C1	CO1	411
P7	LCL	T30C1	CO2	36
P7	LCL	T32C1	CO1	2
P7	LCL	T33C1	CO1	0
P7	LCL	T34C1	CO1	0
P7	LCL	T35C1	CO1	1
P7	LCL	T36C1	CO1	0
P7	LCL	T37C1	CO1	1
P7	LCL	T38C1	CO1	1
P7	LCL	T39C1	CO1	0
P7	LCL	T40C1	CO2	0
P7	LCL	T41C1	CO2	0
P7	LCL	T42C1	CO1	77
P7	LCL	T43C1	CO2	1112
P7	LCL	T44C1	CO2	377
P7	LCL	T45C1	CO1	792
P7	LCL	T46C1	CO1	36
P7	LCL	T47C1	CO2	49
P7	LCL	T48C1	CO2	7
P8	HUVEC	T16C2	CO1	23
P8	HUVEC	T17C2	CO1	0
P8	HUVEC	T24C1	CO1	65
P8	HUVEC	T25C1	CO2	381
P8	HUVEC	T26C1	CO1	12
P8	HUVEC	T27C1	CO1	25
P8	HUVEC	T28C1	CO1	62
P8	HUVEC	T29C1	CO1	25
P8	HUVEC	T30C1	CO2	319
P8	HUVEC	T32C1	CO1	0
P8	HUVEC	T33C1	CO1	33
P8	HUVEC	T34C1	CO1	0
P8	HUVEC	T35C1	CO1	10
P8	HUVEC	T36C1	CO1	0
P8	HUVEC	T37C1	CO1	1
P8	HUVEC	T38C1	CO1	0
P8	HUVEC	T39C1	CO1	0
P8	HUVEC	T40C1	CO2	121
P8	HUVEC	T41C1	CO2	15
P8	HUVEC	T42C1	CO1	60
P8	HUVEC	T43C1	CO2	401
P8	HUVEC	T44C1	CO2	0
P8	HUVEC	T45C1	CO1	4
P8	HUVEC	T46C1	CO1	6
P8	HUVEC	T47C1	CO2	207
P8	HUVEC	T48C1	CO2	2
P9	SMC	T10C1	CO3	63
P9	SMC	T10C2	CO2	1
P9	SMC	T11C1	CO2	20
P9	SMC	T12C1	CO2	2992
P9	SMC	T13C1	CO1	1856
P9	SMC	T14C1	CO1	0
P9	SMC	T15C1	CO1	0
P9	SMC	T16C1	CO1	11255
P9	SMC	T17C1	CO1	13597
P9	SMC	T18C1	CO1	253
P9	SMC	T19C1	CO1	828
P9	SMC	T1C1	CO1	72
P9	SMC	T20C1	CO1	61
P9	SMC	T21C1	CO3	7716
P9	SMC	T22C1	CO1	4
P9	SMC	T23C1	CO2	441
P9	SMC	T2C1	CO1	0
P9	SMC	T3C1	CO1	2
P9	SMC	T4C1	CO1	212
P9	SMC	T5C1	CO1	97
P9	SMC	T6C1	CO2	493
P9	SMC	T7C1	CO2	20
P9	SMC	T9C1	CO2	876
P6	PBMC	T10C1	CO3	0
P6	PBMC	T10C2	CO2	0
P6	PBMC	T11C1	CO2	0
P6	PBMC	T12C1	CO2	4789
P6	PBMC	T13C1	CO1	7287
P6	PBMC	T14C1	CO1	1087
P6	PBMC	T15C1	CO1	48
P6	PBMC	T16C1	CO1	8389
P6	PBMC	T17C1	CO1	12488
P6	PBMC	T18C1	CO1	2210
P6	PBMC	T19C1	CO1	30
P6	PBMC	T1C1	CO1	1
P6	PBMC	T20C1	CO1	384
P6	PBMC	T21C1	CO3	6882
P6	PBMC	T22C1	CO1	1
P6	PBMC	T23C1	CO2	16402
P6	PBMC	T2C1	CO1	0
P6	PBMC	T3C1	CO1	1
P6	PBMC	T4C1	CO1	0
P6	PBMC	T5C1	CO1	0
P6	PBMC	T6C1	CO2	1111
P6	PBMC	T7C1	CO2	799
P6	PBMC	T9C1	CO2	14
P10	SMC	T16C2	CO1	89
P10	SMC	T17C2	CO1	0
P10	SMC	T24C1	CO1	205
P10	SMC	T25C1	CO2	164
P10	SMC	T26C1	CO1	152
P10	SMC	T27C1	CO1	55
P10	SMC	T28C1	CO1	89
P10	SMC	T29C1	CO1	170
P10	SMC	T30C1	CO2	171
P10	SMC	T32C1	CO1	6
P10	SMC	T33C1	CO1	134
P10	SMC	T34C1	CO1	19
P10	SMC	T35C1	CO1	12
P10	SMC	T36C1	CO1	10
P10	SMC	T37C1	CO1	6
P10	SMC	T38C1	CO1	0
P10	SMC	T39C1	CO1	1
P10	SMC	T40C1	CO2	21
P10	SMC	T41C1	CO2	62
P10	SMC	T42C1	CO1	257
P10	SMC	T43C1	CO2	170
P10	SMC	T44C1	CO2	0
P10	SMC	T45C1	CO1	19
P10	SMC	T46C1	CO1	9
P10	SMC	T47C1	CO2	3
P10	SMC	T48C1	CO2	12
