# Supplementary material for: High-throughput allele-specific expression across 250 environmental conditions
Source: Genome Res. 2016 Dec;26(12):1627–38. doi: 10.1101/gr.209759.116 (PMC5131815; doi:10.1101/gr.209759.116)
Supplement: Supplemental Material [file supp_gr.209759.116_Supplemental_Table_S4.xlsx]

## Sheet: ReadCountsDeep
Plate ID	Cell Type	Cell Line	Barcode ID	Treatment ID	Total Reads	Aligned Reads	Quality Reads	Clean Reads
DP1	LCL	GM18507	8	CO1	34313022	40558807	22560928	17590098
DP1	LCL	GM18507	20	CO1	27481388	31869427	17160949	12989886
DP1	LCL	GM18507	91	CO1	28895414	32471573	19114102	14659422
DP1	LCL	GM18508	12	CO1	28447298	31925858	16699773	12755758
DP1	LCL	GM18508	24	CO1	31566032	32718517	17361416	13212880
DP1	LCL	GM18508	95	CO1	28601734	33724940	18833456	14610536
DP1	LCL	GM19239	4	CO1	28646484	32873663	19921130	15743884
DP1	LCL	GM19239	16	CO1	28647064	31934033	19060072	14715170
DP1	LCL	GM19239	87	CO1	32173402	15772951	10026720	7929692
DP1	LCL	GM18507	32	CO2	25253826	30710466	15950202	12470528
DP1	LCL	GM18507	44	CO2	41833044	48460678	24657692	18703066
DP1	LCL	GM18507	56	CO2	62159954	69162808	36002892	28016318
DP1	LCL	GM18508	36	CO2	54623036	62649821	33286823	25700648
DP1	LCL	GM18508	48	CO2	49642628	42301386	21441037	16202988
DP1	LCL	GM18508	60	CO2	55952496	61829280	34124703	26103196
DP1	LCL	GM19239	28	CO2	61848808	67791530	40972182	32063772
DP1	LCL	GM19239	40	CO2	69690086	76002317	42749882	33241802
DP1	LCL	GM19239	52	CO2	38144764	38232361	23824105	18813608
DP1	LCL	GM18507	54	T12C1	106291166	96172991	53060111	38471274
DP1	LCL	GM18508	58	T12C1	103020838	115280020	62263971	47467966
DP1	LCL	GM19239	50	T12C1	102044940	111848609	66265737	51358626
DP1	LCL	GM18507	66	T13C1	95805936	82091361	46105036	33551986
DP1	LCL	GM18508	70	T13C1	107232332	113200852	63200879	46631870
DP1	LCL	GM19239	62	T13C1	90457302	91294224	56401895	42486516
DP1	LCL	GM18507	90	T15C1	99753262	115645470	71641134	57997240
DP1	LCL	GM18508	94	T15C1	88172900	101102382	60813166	47698534
DP1	LCL	GM19239	86	T15C1	101539960	92781320	62279613	47766446
DP1	LCL	GM18507	43	T19C1	89971910	88016634	53820490	40908128
DP1	LCL	GM18508	47	T19C1	123696810	130655504	78311815	58432488
DP1	LCL	GM19239	39	T19C1	100587638	107247492	66795403	52140660
DP1	LCL	GM18507	65	T6C1	97795784	101265963	63447844	48217236
DP1	LCL	GM18508	69	T6C1	100938380	113383298	72478146	56986648
DP1	LCL	GM19239	61	T6C1	103993724	118231603	81763960	66064074
DP10	SMC	SM046-A	64	CO1	27166668	33449814	15955960	12543866
DP10	SMC	SM046-A	76	CO1	25408282	31498964	15064074	11851774
DP10	SMC	SM046-A	88	CO1	22903224	28130810	14056297	11163318
DP10	SMC	SM050-A	68	CO1	32255082	36680389	19705745	15353064
DP10	SMC	SM050-A	80	CO1	23963010	27824771	14631607	11197688
DP10	SMC	SM050-A	92	CO1	25324016	29293346	15198780	11649392
DP10	SMC	SM794-L	72	CO1	21922044	25615184	13368860	10588736
DP10	SMC	SM794-L	84	CO1	28847144	34230530	17642777	13981350
DP10	SMC	SM794-L	96	CO1	23436198	27708831	14542997	11717382
DP10	SMC	SM046-A	28	CO2	40488628	50221914	25355385	20240034
DP10	SMC	SM046-A	40	CO2	24349920	28870683	14303395	10872608
DP10	SMC	SM046-A	52	CO2	24652448	30013716	15285741	12248814
DP10	SMC	SM050-A	32	CO2	25844132	29094586	15163405	11728314
DP10	SMC	SM050-A	44	CO2	26280604	30923144	16352704	12778622
DP10	SMC	SM050-A	56	CO2	27086788	31703155	17171297	13552448
DP10	SMC	SM794-L	36	CO2	25942982	30540013	15986997	12768246
DP10	SMC	SM794-L	48	CO2	25199398	29774061	15910200	12564976
DP10	SMC	SM794-L	60	CO2	25462472	29890780	15514733	12182398
DP10	SMC	SM046-A	1	T24C1	114156574	134245961	71114751	56495570
DP10	SMC	SM050-A	5	T24C1	117131126	140543318	73220746	58192584
DP10	SMC	SM794-L	9	T24C1	135511974	161718526	86045725	68155932
DP10	SMC	SM046-A	13	T25C1	128089610	150107081	76445113	60254124
DP10	SMC	SM050-A	17	T25C1	101125528	121004176	62072737	49211330
DP10	SMC	SM794-L	21	T25C1	108763760	130077900	65856956	51350666
DP10	SMC	SM046-A	25	T26C1	112207554	137088059	69871129	56025984
DP10	SMC	SM050-A	29	T26C1	107078004	127574424	68038431	53879772
DP10	SMC	SM794-L	33	T26C1	83610420	100317991	51062360	40423826
DP10	SMC	SM046-A	61	T29C1	136822378	164227325	84195699	66972590
DP10	SMC	SM050-A	65	T29C1	103819406	111014564	57472113	37418126
DP10	SMC	SM794-L	69	T29C1	108876322	130847742	67119107	53234806
DP10	SMC	SM046-A	73	T30C1	90360476	107952187	56327366	44703090
DP10	SMC	SM050-A	77	T30C1	111494278	133747830	71023934	56373494
DP10	SMC	SM794-L	81	T30C1	136679170	162393276	84521028	66168500
DP10	SMC	SM046-A	14	T33C1	133504790	164656598	77124383	60256910
DP10	SMC	SM050-A	18	T33C1	110947244	132239333	68165883	53789658
DP10	SMC	SM794-L	22	T33C1	134655008	161705031	83105111	65103238
DP10	SMC	SM046-A	27	T42C1	198790526	241729006	120216869	95346344
DP10	SMC	SM050-A	31	T42C1	112374914	136425885	68411235	54131228
DP10	SMC	SM794-L	35	T42C1	110006678	128631884	66106026	52143866
DP10	SMC	SM046-A	39	T43C1	113067636	131793910	65623290	50999410
DP10	SMC	SM050-A	43	T43C1	109049136	132064514	67213674	53448654
DP10	SMC	SM794-L	47	T43C1	100158474	118014653	60922786	47601560
DP11	Mel	NM10-L	12	CO1	22724304	24383668	14240821	10057322
DP11	Mel	NM10-L	24	CO1	22075674	23821094	13638769	9796578
DP11	Mel	NM10-L	95	CO1	25669120	25766206	14619011	10414318
DP11	Mel	NM31-P	8	CO1	25804528	28218320	15522410	11079780
DP11	Mel	NM31-P	20	CO1	23620802	26197560	14472241	10465194
DP11	Mel	NM31-P	91	CO1	21314846	24167503	14532584	10802602
DP11	Mel	NM85-L	4	CO1	20773670	22214679	12027266	8885130
DP11	Mel	NM85-L	16	CO1	26259550	22818259	12214604	8727956
DP11	Mel	NM85-L	87	CO1	21885284	22723001	13521037	10333844
DP11	Mel	NM10-L	36	CO2	22121536	21154454	12018566	8693246
DP11	Mel	NM10-L	48	CO2	48268586	49564504	28477955	20255496
DP11	Mel	NM10-L	60	CO2	23446600	23737553	13361043	9752294
DP11	Mel	NM31-P	32	CO2	25118270	27491230	15617947	11245540
DP11	Mel	NM31-P	44	CO2	21453844	24610158	13661016	9865564
DP11	Mel	NM31-P	56	CO2	25258610	26912075	14567127	10465516
DP11	Mel	NM85-L	28	CO2	27453156	28923671	15166808	10951278
DP11	Mel	NM85-L	40	CO2	24583066	23774815	12755185	9296068
DP11	Mel	NM85-L	52	CO2	23217896	25072226	12866883	9320858
DP11	Mel	NM10-L	72	CO3	45382586	39016611	21959501	15642946
DP11	Mel	NM10-L	84	CO3	24773512	22006305	12406517	9027146
DP11	Mel	NM10-L	96	CO3	21865972	21571252	12486351	8945644
DP11	Mel	NM31-P	68	CO3	26352188	29710012	15828361	11231736
DP11	Mel	NM31-P	80	CO3	27535290	30363626	16018485	11220348
DP11	Mel	NM31-P	92	CO3	25725572	28009387	15374330	11106492
DP11	Mel	NM85-L	64	CO3	24970734	26553343	13709276	9794816
DP11	Mel	NM85-L	76	CO3	23058950	26630589	14101500	10269420
DP11	Mel	NM85-L	88	CO3	22229858	23901557	12977777	9620476
DP11	Mel	NM10-L	58	T12C1	83778470	83482587	47665650	35027788
DP11	Mel	NM31-P	54	T12C1	82664488	82653444	42320387	28637200
DP11	Mel	NM85-L	50	T12C1	70342460	74898976	41550266	30582614
DP11	Mel	NM10-L	70	T13C1	67547100	63831879	36248978	26026102
DP11	Mel	NM31-P	66	T13C1	71320640	79289059	42100597	27996944
DP11	Mel	NM85-L	62	T13C1	73087746	79707377	43064406	31989420
DP11	Mel	NM10-L	47	T19C1	75839426	62508299	33335148	23833698
DP11	Mel	NM31-P	43	T19C1	85243334	78771538	43965829	31228750
DP11	Mel	NM85-L	39	T19C1	114921600	104460908	57935125	42766014
DP11	Mel	NM10-L	71	T21C1	63878466	48522193	30984542	22824952
DP11	Mel	NM31-P	67	T21C1	68990048	64291847	42323515	27957270
DP11	Mel	NM85-L	63	T21C1	75852664	73697816	49623066	37632868
DP11	Mel	NM10-L	93	T23C1	77987682	84131803	47934243	34211174
DP11	Mel	NM31-P	89	T23C1	81571434	85593654	50253104	37411576
DP11	Mel	NM85-L	85	T23C1	78567626	82229112	48801257	37260808
DP11	Mel	NM10-L	69	T6C1	74584500	75784241	42021058	30026468
DP11	Mel	NM31-P	65	T6C1	70760116	56635086	33806288	24212382
DP11	Mel	NM85-L	61	T6C1	73873954	78839404	45808863	35130064
DP11	Mel	NM10-L	81	T7C1	119850304	112407254	59764181	41851288
DP11	Mel	NM31-P	77	T7C1	110411794	102615049	56209367	40679600
DP11	Mel	NM85-L	73	T7C1	111694164	95834181	53113699	39391252
DP12	Mel	NM10-L	72	CO1	68714140	75709467	45621974	32776038
DP12	Mel	NM10-L	84	CO1	24805716	19794227	17245298	10988074
DP12	Mel	NM10-L	96	CO1	46503420	54300210	28718190	20055148
DP12	Mel	NM31-P	68	CO1	35446336	37358148	23119328	17518084
DP12	Mel	NM31-P	80	CO1	55410084	64228883	35089149	25004604
DP12	Mel	NM31-P	92	CO1	42099880	46784856	28735873	21534720
DP12	Mel	NM85-L	64	CO1	29890096	29639021	18176780	13671838
DP12	Mel	NM85-L	76	CO1	40367924	45201727	27438185	20309650
DP12	Mel	NM85-L	88	CO1	35417794	39810772	23655273	17641000
DP12	Mel	NM10-L	36	CO2	39821586	42577437	22468486	15969294
DP12	Mel	NM10-L	48	CO2	45953890	49768316	29719191	20382680
DP12	Mel	NM10-L	60	CO2	50809772	56457754	33925567	24189542
DP12	Mel	NM31-P	32	CO2	56128056	62341085	36942213	27179296
DP12	Mel	NM31-P	44	CO2	60560712	70218944	36777783	26471382
DP12	Mel	NM31-P	56	CO2	26501554	26315435	15510688	11542990
DP12	Mel	NM85-L	28	CO2	35287132	37729007	22867661	17061078
DP12	Mel	NM85-L	40	CO2	37732050	35857139	22018941	16761486
DP12	Mel	NM85-L	52	CO2	40009004	46274841	24940302	17907500
DP12	Mel	NM10-L	81	T30C1	115320146	129466814	71729431	52627694
DP12	Mel	NM31-P	77	T30C1	96560418	109864450	65833178	47785068
DP12	Mel	NM85-L	73	T30C1	97396366	100923669	56380967	39590028
DP12	Mel	NM10-L	22	T33C1	115609634	128186556	73080942	53087536
DP12	Mel	NM31-P	18	T33C1	105564408	120238257	64870785	46683280
DP12	Mel	NM85-L	14	T33C1	147853194	166986776	79082768	57895306
DP12	Mel	NM10-L	11	T40C1	109980614	105478607	61051259	39912652
DP12	Mel	NM31-P	7	T40C1	96530234	107402680	65133104	47411680
DP12	Mel	NM85-L	3	T40C1	89778070	99419354	58971398	44075354
DP12	Mel	NM10-L	23	T41C1	107606422	115038644	66200038	48325598
DP12	Mel	NM31-P	19	T41C1	95011824	104300971	62304632	46006550
DP12	Mel	NM85-L	15	T41C1	98201152	110692962	61111082	45498526
DP12	Mel	NM10-L	35	T42C1	92280596	96401637	54194282	38085056
DP12	Mel	NM31-P	31	T42C1	86447828	90890509	54267445	41064210
DP12	Mel	NM85-L	27	T42C1	115517266	120320740	68354529	51923892
DP12	Mel	NM10-L	47	T43C1	103681362	113330440	63893570	44814786
DP12	Mel	NM31-P	43	T43C1	151427940	169089563	100074348	72951270
DP12	Mel	NM85-L	39	T43C1	59749976	59238444	33023351	25105726
DP12	Mel	NM10-L	59	T44C1	101196172	109552022	64887927	45028744
DP12	Mel	NM31-P	55	T44C1	89864794	97043811	59774216	45525886
DP12	Mel	NM85-L	51	T44C1	91661844	84258737	51562598	36853224
DP12	Mel	NM10-L	95	T47C1	89011882	91211340	51011951	35286986
DP12	Mel	NM31-P	91	T47C1	111234562	123953553	70843576	52208410
DP12	Mel	NM85-L	87	T47C1	119282308	129212397	74977176	55976374
DP4	HUVEC	H004-A	8	CO1	34538472	35038306	21456131	16860328
DP4	HUVEC	H004-A	20	CO1	32872572	34375409	20932544	16036762
DP4	HUVEC	H004-A	91	CO1	32011658	35472809	21748270	16615310
DP4	HUVEC	H013-A	4	CO1	48206236	55219378	34010405	26361830
DP4	HUVEC	H013-A	87	CO1	40555188	46577814	26618073	20543232
DP4	HUVEC	H288-L	12	CO1	30530286	33126642	20311411	15011062
DP4	HUVEC	H288-L	24	CO1	30854506	34657151	21151628	16221838
DP4	HUVEC	H288-L	95	CO1	31000436	34895692	20699109	15559820
DP4	HUVEC	H004-A	32	CO2	34893250	36770833	21980487	16665928
DP4	HUVEC	H004-A	44	CO2	47353716	48053065	27810821	20415716
DP4	HUVEC	H004-A	56	CO2	43237458	46205044	27662052	21007702
DP4	HUVEC	H013-A	28	CO2	32761818	37395892	23192763	17922508
DP4	HUVEC	H013-A	40	CO2	36370762	41323102	23905082	16773294
DP4	HUVEC	H013-A	52	CO2	33154956	37662706	22600218	16866172
DP4	HUVEC	H288-L	36	CO2	30657542	34510897	20936520	15982168
DP4	HUVEC	H288-L	48	CO2	31103142	35413490	22102435	16769002
DP4	HUVEC	H288-L	60	CO2	32452992	36172082	21932113	16135362
DP4	HUVEC	H004-A	54	T12C1	90872548	101642755	59079724	39776848
DP4	HUVEC	H013-A	50	T12C1	107400356	125198565	68614928	52388312
DP4	HUVEC	H288-L	58	T12C1	91291970	104385500	60846556	46739644
DP4	HUVEC	H004-A	66	T13C1	119162088	128064048	75938427	46575294
DP4	HUVEC	H013-A	62	T13C1	92735672	109350848	63114630	49679848
DP4	HUVEC	H288-L	70	T13C1	95302460	106196726	63586873	46659846
DP4	HUVEC	H004-A	31	T18C1	136241900	134765501	76493378	53847228
DP4	HUVEC	H013-A	27	T18C1	58807156	66957486	37362724	27808620
DP4	HUVEC	H288-L	35	T18C1	102927302	107134440	64872678	45977624
DP4	HUVEC	H004-A	43	T19C1	121560974	124164782	78789444	63063870
DP4	HUVEC	H013-A	39	T19C1	95189076	107651957	67460381	54030162
DP4	HUVEC	H288-L	47	T19C1	88821680	93652400	60266590	46244982
DP4	HUVEC	H004-A	89	T23C1	90849878	94760511	61728329	45522304
DP4	HUVEC	H013-A	85	T23C1	100075470	110456485	65755414	50406924
DP4	HUVEC	H288-L	93	T23C1	96750598	109415824	64591038	48627378
DP4	HUVEC	H004-A	65	T6C1	108737834	71481583	43993281	25813712
DP4	HUVEC	H013-A	61	T6C1	101804376	114157974	65563703	50194928
DP4	HUVEC	H288-L	69	T6C1	92570686	105153661	60836838	46246696
DP5	PBMC	KP39334	64	CO1	43234374	45856619	27870974	20561920
DP5	PBMC	KP39334	76	CO1	52816460	57501650	35696593	27017770
DP5	PBMC	KP39334	88	CO1	46468022	50614286	31576540	24797112
DP5	PBMC	KP39346	68	CO1	51553242	55235631	36133103	27272750
DP5	PBMC	KP39346	80	CO1	48663300	53486481	34316434	25855092
DP5	PBMC	KP39346	92	CO1	44764608	47983241	31309479	24277178
DP5	PBMC	KP39351	72	CO1	45116238	47906226	31075768	24264058
DP5	PBMC	KP39351	84	CO1	47365004	51337729	32189584	25150450
DP5	PBMC	KP39351	96	CO1	51153384	56422717	36158106	28190496
DP5	PBMC	KP39334	28	CO2	42709346	45220055	28241709	21272558
DP5	PBMC	KP39334	40	CO2	45910498	50021263	30442258	23154000
DP5	PBMC	KP39334	52	CO2	44071894	45779878	28541909	21929206
DP5	PBMC	KP39346	32	CO2	44992376	48539775	33291590	25873094
DP5	PBMC	KP39346	44	CO2	42002642	46045905	29902922	22318178
DP5	PBMC	KP39346	56	CO2	42256066	46228249	31232582	24357920
DP5	PBMC	KP39351	36	CO2	49237696	52915659	33685448	26149796
DP5	PBMC	KP39351	48	CO2	49591432	53987033	34421659	26315894
DP5	PBMC	KP39351	60	CO2	39417080	38793315	26778471	20795974
DP5	PBMC	KP39334	37	T27C1	142916566	135831916	91047009	73015082
DP5	PBMC	KP39346	41	T27C1	134213394	143850604	97791942	74866500
DP5	PBMC	KP39351	45	T27C1	131623776	142362666	94277816	72581388
DP5	PBMC	KP39334	62	T37C1	176684740	179039136	112943139	88107928
DP5	PBMC	KP39346	66	T37C1	142184796	137597696	84920684	54362480
DP5	PBMC	KP39351	70	T37C1	149155576	162295547	97093883	69593338
DP5	PBMC	KP39334	3	T40C1	85764018	92183301	59776850	45067908
DP5	PBMC	KP39346	7	T40C1	89325314	98324821	64901977	48572374
DP5	PBMC	KP39351	11	T40C1	82626182	92126273	58266057	41808754
DP5	PBMC	KP39334	27	T42C1	153947308	155499207	98040964	72721490
DP5	PBMC	KP39346	31	T42C1	119289786	128676871	83862281	60006234
DP5	PBMC	KP39351	35	T42C1	139675592	155218058	97371703	73349360
DP5	PBMC	KP39334	39	T43C1	120083502	124387574	78908768	57825592
DP5	PBMC	KP39346	43	T43C1	120814228	130231417	87675873	64762098
DP5	PBMC	KP39351	47	T43C1	111421790	124007316	79345037	59090458
DP5	PBMC	KP39334	87	T47C1	112833150	115288186	74302554	58160416
DP5	PBMC	KP39346	91	T47C1	86387922	91672601	60010581	46280890
DP5	PBMC	KP39351	95	T47C1	139932710	153196126	98013961	74607042
DP6	PBMC	KP39334	4	CO1	62682490	68803288	43815559	34866418
DP6	PBMC	KP39334	16	CO1	62338196	64955088	41071647	31205530
DP6	PBMC	KP39334	87	CO1	57843928	62371482	43044203	35889016
DP6	PBMC	KP39346	8	CO1	66481438	73718662	46106018	36226834
DP6	PBMC	KP39346	20	CO1	66806840	71666715	46614884	36734292
DP6	PBMC	KP39346	91	CO1	51582780	57269007	37450906	29681482
DP6	PBMC	KP39351	12	CO1	68167038	75986145	46963707	35353750
DP6	PBMC	KP39351	24	CO1	60783888	66412727	42225742	32073318
DP6	PBMC	KP39351	95	CO1	21874880	24070331	15524833	12132400
DP6	PBMC	KP39334	28	CO2	62427544	63039422	40894004	33238260
DP6	PBMC	KP39334	40	CO2	47845436	52513901	34171236	27280764
DP6	PBMC	KP39334	52	CO2	66247612	73017279	47086067	37547088
DP6	PBMC	KP39346	32	CO2	67957092	73991909	48429971	38491534
DP6	PBMC	KP39346	44	CO2	63578054	69933024	45808687	36178166
DP6	PBMC	KP39346	56	CO2	74349608	82306927	54502247	43587410
DP6	PBMC	KP39351	36	CO2	41610734	45222665	28605579	22352906
DP6	PBMC	KP39351	48	CO2	36156556	39968068	25539072	20005480
DP6	PBMC	KP39351	60	CO2	29817464	32994472	20624165	15966310
DP6	PBMC	KP39334	50	T12C1	96582230	105438006	68908370	55398830
DP6	PBMC	KP39346	54	T12C1	136398596	137477730	90704818	70052804
DP6	PBMC	KP39351	58	T12C1	107686650	108395625	73626029	58450128
DP6	PBMC	KP39334	62	T13C1	125564330	136356829	92486970	71218042
DP6	PBMC	KP39346	66	T13C1	127511232	123949675	84405379	62925638
DP6	PBMC	KP39351	70	T13C1	122571848	135344308	90469076	69217864
DP6	PBMC	KP39334	74	T14C1	115935638	129623976	80923390	64293650
DP6	PBMC	KP39346	78	T14C1	100705680	96441817	62093449	48692552
DP6	PBMC	KP39351	82	T14C1	99082066	107019963	70915356	55000380
DP6	PBMC	KP39334	86	T15C1	127694132	143368651	93276447	73155144
DP6	PBMC	KP39346	90	T15C1	118494512	133319269	87155246	69203476
DP6	PBMC	KP39351	94	T15C1	125286122	142946982	89494883	67236524
DP6	PBMC	KP39334	3	T16C1	99302286	103680617	74761703	62078066
DP6	PBMC	KP39346	7	T16C1	98803522	98461510	67620781	51465780
DP6	PBMC	KP39351	11	T16C1	111268796	119360877	80176707	58487020
DP6	PBMC	KP39334	27	T18C1	92005208	96726284	66820013	55521314
DP6	PBMC	KP39346	31	T18C1	92291338	87240175	57897016	45973862
DP6	PBMC	KP39351	35	T18C1	105638038	108412849	68365040	52541478
DP6	PBMC	KP39334	51	T20C1	120146052	134657110	88434824	66278332
DP6	PBMC	KP39346	55	T20C1	119596574	130072541	88100757	69992244
DP6	PBMC	KP39351	59	T20C1	129891100	138586453	89793267	70119308
DP6	PBMC	KP39334	85	T23C1	88873876	88622269	58713768	45391918
DP6	PBMC	KP39346	89	T23C1	137246700	141956501	98861846	78641138
DP6	PBMC	KP39351	93	T23C1	69508226	69686317	53637899	42918586
DP6	PBMC	KP39334	13	T2C1	97749108	105352654	70776140	54662330
DP6	PBMC	KP39346	17	T2C1	105648052	114203749	78292999	62783980
DP6	PBMC	KP39351	21	T2C1	102220838	114274619	74749479	58706632
DP6	PBMC	KP39334	25	T3C1	95034960	103757661	70944760	56880812
DP6	PBMC	KP39346	29	T3C1	74866028	68766468	46220608	37142014
DP6	PBMC	KP39351	33	T3C1	103270426	110481057	74514352	60144084
DP6	PBMC	KP39334	37	T4C1	105664716	116998215	79342160	62076870
DP6	PBMC	KP39346	41	T4C1	113361392	125353412	85283347	66676968
DP6	PBMC	KP39351	45	T4C1	94350766	103601454	67567085	52095844
DP6	PBMC	KP39334	49	T5C1	98520522	107801742	71555953	55892916
DP6	PBMC	KP39346	53	T5C1	112514606	115513277	81207114	66841472
DP6	PBMC	KP39351	57	T5C1	112292670	106434814	68993897	52957224
DP6	PBMC	KP39334	61	T6C1	124740870	137566791	93791035	75475472
DP6	PBMC	KP39346	65	T6C1	115135286	124710577	84416453	60875704
DP6	PBMC	KP39351	69	T6C1	98650128	107160535	70750266	56775942
DP6	PBMC	KP39334	73	T7C1	126845332	137923490	91993792	74997856
DP6	PBMC	KP39346	77	T7C1	105448782	114132427	74450542	59769332
DP6	PBMC	KP39351	81	T7C1	100876602	108401142	72970871	56112590
DP7	LCL	GM18507	64	CO1	56082088	55399100	30255051	23740546
DP7	LCL	GM18507	76	CO1	72152658	71040443	38788966	30473558
DP7	LCL	GM18507	88	CO1	57281574	57389986	30833439	24147518
DP7	LCL	GM18508	68	CO1	56899298	56949135	31835842	24907026
DP7	LCL	GM18508	80	CO1	52998686	51366419	28725302	22582268
DP7	LCL	GM18508	92	CO1	51261728	46659859	25140290	19435716
DP7	LCL	GM19239	72	CO1	66679254	68959881	33489365	25666912
DP7	LCL	GM19239	84	CO1	51586614	53282357	25718697	19642420
DP7	LCL	GM19239	96	CO1	65080082	69691317	33325417	25547340
DP7	LCL	GM18507	28	CO2	63069598	64300323	34630521	27056744
DP7	LCL	GM18507	40	CO2	78149674	83080370	43959727	34413778
DP7	LCL	GM18507	52	CO2	79994326	86074924	45920501	36077384
DP7	LCL	GM18508	32	CO2	61072010	62833212	35161280	27618174
DP7	LCL	GM18508	44	CO2	88045978	94124543	52637813	41103036
DP7	LCL	GM18508	56	CO2	85465424	91054581	49777473	38840038
DP7	LCL	GM19239	36	CO2	68129490	70743978	36596396	28454972
DP7	LCL	GM19239	48	CO2	70377820	75145821	37075948	28715296
DP7	LCL	GM19239	60	CO2	65948750	71078530	35008330	27183152
DP7	LCL	GM18507	1	T24C1	128969166	148976872	72936100	56579096
DP7	LCL	GM18508	5	T24C1	214046204	244003253	133000770	103795288
DP7	LCL	GM19239	9	T24C1	114796276	133674319	69261146	53065966
DP7	LCL	GM18507	25	T26C1	125028972	146100098	68986304	52898404
DP7	LCL	GM18508	29	T26C1	127530360	144194953	78775947	61263996
DP7	LCL	GM19239	33	T26C1	105039120	123228699	62117364	47646398
DP7	LCL	GM18507	37	T27C1	99314958	81695071	40865148	31668172
DP7	LCL	GM18508	41	T27C1	142083506	135172686	75581197	59963706
DP7	LCL	GM19239	45	T27C1	206225794	225958282	112807131	86990606
DP7	LCL	GM18507	61	T29C1	146199662	144626864	71597113	55299452
DP7	LCL	GM18508	65	T29C1	154335140	154606210	87558672	68477738
DP7	LCL	GM19239	69	T29C1	147734348	152786862	77499235	60021014
DP7	LCL	GM18507	39	T43C1	101641004	113660821	64901763	50640594
DP7	LCL	GM18508	43	T43C1	86729270	95456943	54393833	42234504
DP7	LCL	GM19239	47	T43C1	111806370	131865644	64125597	49234548
DP7	LCL	GM18507	51	T44C1	118833402	131477306	76887656	58823576
DP7	LCL	GM18508	55	T44C1	121637790	134510189	75092185	58178102
DP7	LCL	GM19239	59	T44C1	232433152	274876668	136853452	105195400
DP7	LCL	GM18507	63	T45C1	145607228	138653581	81969492	64384538
DP7	LCL	GM18508	67	T45C1	100409090	72995009	41469100	31805418
DP7	LCL	GM19239	71	T45C1	151844014	152202089	74596719	57582956
DP7	LCL	GM18507	87	T47C1	138909648	128688793	72068673	56982360
DP7	LCL	GM18508	91	T47C1	138620178	131121432	74448266	58892778
DP7	LCL	GM19239	95	T47C1	153977010	163484039	80661383	62107628
DP8	HUVEC	H004-A	68	CO1	32358140	39748781	20676322	15773058
DP8	HUVEC	H004-A	80	CO1	39563926	48059407	25850611	19735842
DP8	HUVEC	H004-A	92	CO1	30849786	36970036	20277724	15467276
DP8	HUVEC	H013-A	64	CO1	25585978	29120357	15416077	12067850
DP8	HUVEC	H013-A	76	CO1	45200252	51901625	26840593	20673462
DP8	HUVEC	H013-A	88	CO1	38334802	46441067	25306953	19804580
DP8	HUVEC	H288-L	72	CO1	36463102	42713022	23589352	18026640
DP8	HUVEC	H288-L	84	CO1	36469568	42856150	24219788	18667576
DP8	HUVEC	H288-L	96	CO1	46624222	56643355	30220724	22107748
DP8	HUVEC	H004-A	32	CO2	33508752	40299574	21775790	16915956
DP8	HUVEC	H004-A	44	CO2	28287212	34595139	17969698	13432154
DP8	HUVEC	H004-A	56	CO2	33409074	40380102	21723242	16689024
DP8	HUVEC	H013-A	28	CO2	31477702	36883048	19281452	14905914
DP8	HUVEC	H013-A	40	CO2	28713882	36047066	16777538	12706476
DP8	HUVEC	H013-A	52	CO2	33771672	34244876	17507124	13685436
DP8	HUVEC	H288-L	36	CO2	27999898	31023936	17702814	13469724
DP8	HUVEC	H288-L	48	CO2	28922376	34541358	18582108	13383092
DP8	HUVEC	H288-L	60	CO2	26112876	29138492	16741688	12796048
DP8	HUVEC	H004-A	5	T24C1	143255912	164818169	93289147	72355810
DP8	HUVEC	H013-A	1	T24C1	239759236	264922060	155843420	123490074
DP8	HUVEC	H288-L	9	T24C1	250283860	281549787	161430246	123752196
DP8	HUVEC	H004-A	17	T25C1	105652918	123054454	67767062	52855364
DP8	HUVEC	H013-A	13	T25C1	103871820	121473054	69822392	55385516
DP8	HUVEC	H288-L	21	T25C1	97654760	115701375	63031816	47791104
DP8	HUVEC	H004-A	77	T30C1	103834570	113120974	61498291	47359512
DP8	HUVEC	H013-A	73	T30C1	189987438	210730312	125202114	99403516
DP8	HUVEC	H288-L	81	T30C1	93733590	106248711	59438256	45081564
DP8	HUVEC	H004-A	18	T33C1	108208128	126986772	62834298	47307734
DP8	HUVEC	H013-A	14	T33C1	105733376	131270405	62612502	47344438
DP8	HUVEC	H288-L	22	T33C1	93639936	113585794	58812727	43306260
DP8	HUVEC	H004-A	7	T40C1	95420414	113956317	62171241	47652424
DP8	HUVEC	H013-A	3	T40C1	203191954	226291298	132362473	104290346
DP8	HUVEC	H288-L	11	T40C1	101099026	119715126	65539479	49487166
DP8	HUVEC	H004-A	43	T43C1	101946670	107838264	55801991	42595878
DP8	HUVEC	H013-A	39	T43C1	98329902	115484985	64874391	51294716
DP8	HUVEC	H288-L	47	T43C1	116839074	137761476	72620307	55441216
DP8	HUVEC	H004-A	91	T47C1	96701236	108702882	60877093	47260042
DP8	HUVEC	H013-A	87	T47C1	99736240	109346740	64405039	51650978
DP8	HUVEC	H288-L	95	T47C1	100699504	110973021	63468755	48657838
DP9	SMC	SM046-A	4	CO1	35630554	43441862	20688327	16054566
DP9	SMC	SM046-A	16	CO1	30406304	34895224	16240476	12434302
DP9	SMC	SM046-A	87	CO1	28015988	33970874	15957089	12404712
DP9	SMC	SM050-A	8	CO1	29962616	35834482	18667636	14615050
DP9	SMC	SM050-A	20	CO1	29578592	36072706	17844258	13926644
DP9	SMC	SM050-A	91	CO1	30534940	36015474	17928593	13881956
DP9	SMC	SM794-L	12	CO1	32406106	39252028	19479753	14908380
DP9	SMC	SM794-L	24	CO1	29309098	35287621	17459269	13530966
DP9	SMC	SM794-L	95	CO1	25299708	30047430	15880198	12549934
DP9	SMC	SM046-A	28	CO2	32920142	41309543	18570712	14283554
DP9	SMC	SM046-A	40	CO2	33442114	40454130	18179460	13855580
DP9	SMC	SM046-A	52	CO2	31725340	37576102	16650821	12794924
DP9	SMC	SM050-A	32	CO2	32482260	38977150	19754819	15509614
DP9	SMC	SM050-A	44	CO2	31102702	37596555	18732127	14564462
DP9	SMC	SM050-A	56	CO2	32387708	38792073	19687946	15332462
DP9	SMC	SM794-L	36	CO2	32123352	39071083	19337313	14845082
DP9	SMC	SM794-L	48	CO2	28907178	34627260	17316541	13336652
DP9	SMC	SM794-L	60	CO2	24953666	29896544	14899833	11446034
DP9	SMC	SM046-A	50	T12C1	103763454	129053858	56959167	44021120
DP9	SMC	SM050-A	54	T12C1	104212908	120862578	59832934	45771586
DP9	SMC	SM794-L	58	T12C1	173157900	210534452	107271632	84092666
DP9	SMC	SM046-A	62	T13C1	101272182	127251314	57733949	44444868
DP9	SMC	SM050-A	66	T13C1	103192046	117337962	58790875	44247346
DP9	SMC	SM794-L	70	T13C1	96844648	113861794	59007873	46093838
DP9	SMC	SM046-A	27	T18C1	106364816	131467214	60273129	46769942
DP9	SMC	SM050-A	31	T18C1	102007334	122403654	60019564	46679158
DP9	SMC	SM794-L	35	T18C1	297496656	356888475	180275474	138876342
DP9	SMC	SM046-A	39	T19C1	103852568	126045317	59026263	47043200
DP9	SMC	SM050-A	43	T19C1	118345514	130922625	68415362	55467210
DP9	SMC	SM794-L	47	T19C1	83215794	97778444	51484921	40886682
DP9	SMC	SM046-A	85	T23C1	95107776	116008949	53513340	41411882
DP9	SMC	SM050-A	89	T23C1	104548212	125939816	60719943	46870354
DP9	SMC	SM794-L	93	T23C1	91135436	105253203	57754166	45792470
DP9	SMC	SM046-A	37	T4C1	76228228	91766892	40548870	30590642
DP9	SMC	SM050-A	41	T4C1	108039696	133665520	58108468	43852568
DP9	SMC	SM794-L	45	T4C1	106900908	127510892	64141575	49797572
DP9	SMC	SM046-A	49	T5C1	86745554	104286706	47949526	36217932
DP9	SMC	SM050-A	53	T5C1	110228496	136397146	61387481	45881372
DP9	SMC	SM794-L	57	T5C1	104865466	126842752	63994143	50039072
DP9	SMC	SM046-A	61	T6C1	95392540	113470573	54655569	42250164
DP9	SMC	SM050-A	65	T6C1	100169534	118190849	55688951	41336626
DP9	SMC	SM794-L	69	T6C1	119781656	142650092	74634609	58845702
DP9	SMC	SM046-A	2	T9C1	130086960	157209378	75814436	59357148
DP9	SMC	SM050-A	6	T9C1	88508178	106734399	52280894	40752064
DP9	SMC	SM794-L	10	T9C1	96652184	115867129	60056735	47160600
										DP9
										DP9
										DP9
										DP9
										DP9
										DP9
										DP9
										DP9
										DP9
										DP9
										DP9
										DP9
										DP9
										DP9
										DP9
										DP9
										DP9
										DP9
										DP9
										DP9
										DP9
										DP9
										DP9
										DP9
										DP9
										DP9
										DP9
										DP9
										DP9
										DP9
										DP9
										DP9
										DP9
										DP9
										DP9
										DP9
										DP9
										DP9
										DP9
										DP9
										DP9
										DP9
										DP9
										DP9
										DP9
