# Supplementary material for: High-throughput allele-specific expression across 250 environmental conditions
Source: Genome Res. 2016 Dec;26(12):1627–38. doi: 10.1101/gr.209759.116 (PMC5131815; doi:10.1101/gr.209759.116)
Supplement: Supplemental Material [file supp_gr.209759.116_Supplemental_Table_S5.xlsx]

## Sheet: DEG_table_deep
Plate ID	Cell Type	Treatment ID	Control ID	All	DEG	Upregulated	Downregulated
DP1	LCL	CO2	CO1	23653	31	28	3
DP1	LCL	T12C1	CO2	20896	3111	1566	1549
DP1	LCL	T13C1	CO1	20896	6909	3616	3338
DP1	LCL	T15C1	CO1	18542	7869	3812	4130
DP1	LCL	T19C1	CO1	32866	14057	8818	5910
DP1	LCL	T6C1	CO2	23653	7679	3973	3741
DP10	SMC	CO2	CO1	13859	1	0	1
DP10	SMC	T24C1	CO1	11285	192	15	177
DP10	SMC	T25C1	CO2	11285	185	15	170
DP10	SMC	T26C1	CO1	9484	82	12	70
DP10	SMC	T29C1	CO1	13004	248	13	235
DP10	SMC	T30C1	CO2	11285	120	60	60
DP10	SMC	T33C1	CO1	13004	189	54	135
DP10	SMC	T42C1	CO1	13859	547	68	479
DP10	SMC	T43C1	CO2	9484	58	24	34
DP11	Mel	CO2	CO1	11193	1	0	1
DP11	Mel	T12C1	CO2	21252	1022	559	464
DP11	Mel	T13C1	CO1	16981	2683	1490	1203
DP11	Mel	T19C1	CO1	14454	2506	1097	1432
DP11	Mel	T21C1	CO3	30883	12308	6288	6213
DP11	Mel	T23C1	CO2	16981	3616	1550	2093
DP11	Mel	T6C1	CO2	14454	2298	1152	1148
DP11	Mel	T7C1	CO2	16981	4737	2402	2456
DP12	Mel	CO2	CO1	31776	0	0	0
DP12	Mel	T30C1	CO2	19258	869	431	439
DP12	Mel	T33C1	CO1	17280	3193	1245	1953
DP12	Mel	T40C1	CO2	15733	1165	57	1110
DP12	Mel	T41C1	CO2	13657	1312	612	705
DP12	Mel	T42C1	CO1	15733	1892	452	1445
DP12	Mel	T43C1	CO2	17280	36	32	4
DP12	Mel	T44C1	CO2	24791	7561	3881	3766
DP12	Mel	T47C1	CO2	17280	1901	421	1488
DP4	HUVEC	CO2	CO1	3330	1	0	1
DP4	HUVEC	T12C1	CO2	17049	2331	912	1422
DP4	HUVEC	T13C1	CO1	17049	2823	1454	1376
DP4	HUVEC	T18C1	CO1	13553	817	439	378
DP4	HUVEC	T19C1	CO1	31165	8470	5263	3293
DP4	HUVEC	T23C1	CO2	11923	1332	782	557
DP4	HUVEC	T6C1	CO2	17049	2512	1191	1325
DP5	PBMC	CO2	CO1	7175	1	0	1
DP5	PBMC	T27C1	CO1	14300	1926	925	1001
DP5	PBMC	T37C1	CO1	13213	2027	1304	727
DP5	PBMC	T40C1	CO2	19000	1039	480	560
DP5	PBMC	T42C1	CO1	17118	1589	564	1025
DP5	PBMC	T43C1	CO2	17118	1385	677	709
DP5	PBMC	T47C1	CO2	12224	1952	953	1004
DP6	PBMC	CO2	CO1	37406	0	0	0
DP6	PBMC	T12C1	CO2	26560	9480	4495	5028
DP6	PBMC	T13C1	CO1	29868	12777	6632	6262
DP6	PBMC	T14C1	CO1	18571	3261	1584	1679
DP6	PBMC	T15C1	CO1	20861	268	152	117
DP6	PBMC	T16C1	CO1	37406	16525	10216	6528
DP6	PBMC	T18C1	CO1	20861	5202	2522	2693
DP6	PBMC	T20C1	CO1	20861	1604	929	679
DP6	PBMC	T23C1	CO2	37406	25803	18113	8382
DP6	PBMC	T2C1	CO1	26560	86	0	86
DP6	PBMC	T3C1	CO1	23551	113	3	110
DP6	PBMC	T4C1	CO1	23551	83	4	79
DP6	PBMC	T5C1	CO1	26560	61	2	59
DP6	PBMC	T6C1	CO2	23551	2701	1409	1295
DP6	PBMC	T7C1	CO2	29868	3643	2975	670
DP7	LCL	CO2	CO1	35228	3	0	3
DP7	LCL	T24C1	CO1	15621	1515	845	671
DP7	LCL	T26C1	CO1	14361	909	604	306
DP7	LCL	T27C1	CO1	15621	1582	809	775
DP7	LCL	T29C1	CO1	15621	1571	913	666
DP7	LCL	T43C1	CO2	9717	84	68	16
DP7	LCL	T44C1	CO2	17323	1891	1247	645
DP7	LCL	T45C1	CO1	15621	1689	831	867
DP7	LCL	T47C1	CO2	14361	846	501	346
DP8	HUVEC	CO2	CO1	31308	0	0	0
DP8	HUVEC	T24C1	CO1	13501	771	274	497
DP8	HUVEC	T25C1	CO2	12668	792	216	581
DP8	HUVEC	T30C1	CO2	15564	1254	583	671
DP8	HUVEC	T33C1	CO1	11875	249	233	16
DP8	HUVEC	T40C1	CO2	11875	369	45	324
DP8	HUVEC	T43C1	CO2	11062	214	9	205
DP8	HUVEC	T47C1	CO2	14441	1350	710	640
DP9	SMC	CO2	CO1	32627	0	0	0
DP9	SMC	T12C1	CO2	25481	6680	3238	3472
DP9	SMC	T13C1	CO1	19786	5151	3108	2081
DP9	SMC	T18C1	CO1	17746	1277	823	454
DP9	SMC	T19C1	CO1	32627	3657	2723	944
DP9	SMC	T23C1	CO2	17746	1726	915	813
DP9	SMC	T4C1	CO1	10601	632	575	57
DP9	SMC	T5C1	CO1	11474	714	630	85
DP9	SMC	T6C1	CO2	14103	1377	937	442
DP9	SMC	T9C1	CO2	19786	2762	1265	1503
