# Supplementary material for: High-throughput allele-specific expression across 250 environmental conditions
Source: Genome Res. 2016 Dec;26(12):1627–38. doi: 10.1101/gr.209759.116 (PMC5131815; doi:10.1101/gr.209759.116)
Supplement: Supplemental Material [file supp_gr.209759.116_Supplemental_Table_S7.xlsx]

## Sheet: networkGeneModule
Ensembl ID	Gene Name	Module
ENSG00000000419	DPM1	0
ENSG00000000457	SCYL3	0
ENSG00000000460	C1orf112	0
ENSG00000001036	FUCA2	75
ENSG00000001084	GCLC	38
ENSG00000001167	NFYA	0
ENSG00000001461	NIPAL3	5
ENSG00000001497	LAS1L	13
ENSG00000001629	ANKIB1	0
ENSG00000001630	CYP51A1	29
ENSG00000001631	KRIT1	0
ENSG00000002016	RAD52	10
ENSG00000002330	BAD	13
ENSG00000002549	LAP3	15
ENSG00000002586	CD99	0
ENSG00000002834	LASP1	51
ENSG00000002919	SNX11	1
ENSG00000003056	M6PR	0
ENSG00000003147	ICA1	2
ENSG00000003393	ALS2	0
ENSG00000003509	C2orf56	6
ENSG00000003756	RBM5	5
ENSG00000003987	MTMR7	0
ENSG00000004059	ARF5	8
ENSG00000004139	SARM1	0
ENSG00000004142	POLDIP2	2
ENSG00000004455	AK2	17
ENSG00000004478	FKBP4	22
ENSG00000004487	KDM1A	0
ENSG00000004534	RBM6	73
ENSG00000004660	CAMKK1	0
ENSG00000004700	RECQL	0
ENSG00000004777	ARHGAP33	19
ENSG00000004779	NDUFAB1	2
ENSG00000004864	SLC25A13	18
ENSG00000004866	ST7	3
ENSG00000004897	CDC27	0
ENSG00000004961	HCCS	17
ENSG00000004975	DVL2	0
ENSG00000005007	UPF1	0
ENSG00000005020	SKAP2	4
ENSG00000005022	SLC25A5	2
ENSG00000005059	CCDC109B	4
ENSG00000005075	POLR2J	63
ENSG00000005100	DHX33	2
ENSG00000005156	LIG3	0
ENSG00000005175	RPAP3	0
ENSG00000005187	ACSM3	56
ENSG00000005194	CIAPIN1	2
ENSG00000005206	SPPL2B	0
ENSG00000005238	FAM214B	0
ENSG00000005243	COPZ2	0
ENSG00000005302	MSL3	0
ENSG00000005339	CREBBP	0
ENSG00000005436	GCFC2	25
ENSG00000005448	WDR54	0
ENSG00000005483	MLL5	17
ENSG00000005486	RHBDD2	0
ENSG00000005700	IBTK	12
ENSG00000005801	ZNF195	61
ENSG00000005812	FBXL3	57
ENSG00000005882	PDK2	5
ENSG00000005884	ITGA3	0
ENSG00000005889	ZFX	0
ENSG00000005893	LAMP2	49
ENSG00000005955	GGNBP2	41
ENSG00000006007	GDE1	0
ENSG00000006015	C19orf60	0
ENSG00000006016	CRLF1	11
ENSG00000006025	OSBPL7	0
ENSG00000006062	MAP3K14	0
ENSG00000006114	SYNRG	2
ENSG00000006118	TMEM132A	1
ENSG00000006125	AP2B1	0
ENSG00000006194	ZNF263	0
ENSG00000006327	TNFRSF12A	79
ENSG00000006451	RALA	0
ENSG00000006459	JHDM1D	0
ENSG00000006530	AGK	1
ENSG00000006576	PHTF2	37
ENSG00000006607	FARP2	12
ENSG00000006625	GGCT	0
ENSG00000006634	DBF4	19
ENSG00000006652	IFRD1	53
ENSG00000006695	COX10	0
ENSG00000006704	GTF2IRD1	13
ENSG00000006712	PAF1	0
ENSG00000006715	VPS41	0
ENSG00000006744	ELAC2	2
ENSG00000006757	PNPLA4	1
ENSG00000006837	CDKL3	1
ENSG00000007047	MARK4	1
ENSG00000007080	CCDC124	2
ENSG00000007168	PAFAH1B1	34
ENSG00000007202	KIAA0100	0
ENSG00000007255	TRAPPC6A	0
ENSG00000007341	ST7L	1
ENSG00000007376	RPUSD1	21
ENSG00000007384	RHBDF1	0
ENSG00000007392	LUC7L	43
ENSG00000007516	BAIAP3	0
ENSG00000007520	TSR3	21
ENSG00000007541	PIGQ	0
ENSG00000007545	CRAMP1L	0
ENSG00000007944	MYLIP	1
ENSG00000008018	PSMB1	80
ENSG00000008056	SYN1	0
ENSG00000008083	JARID2	0
ENSG00000008086	CDKL5	26
ENSG00000008128	CDK11A	6
ENSG00000008130	NADK	13
ENSG00000008226	DLEC1	0
ENSG00000008256	CYTH3	1
ENSG00000008282	SYPL1	58
ENSG00000008283	CYB561	0
ENSG00000008294	SPAG9	33
ENSG00000008323	PLEKHG6	1
ENSG00000008394	MGST1	42
ENSG00000008405	CRY1	0
ENSG00000008438	PGLYRP1	0
ENSG00000008441	NFIX	0
ENSG00000008710	PKD1	7
ENSG00000008838	MED24	0
ENSG00000008853	RHOBTB2	1
ENSG00000008869	HEATR5B	0
ENSG00000008952	SEC62	0
ENSG00000008988	RPS20	11
ENSG00000009307	CSDE1	49
ENSG00000009335	UBE3C	0
ENSG00000009413	REV3L	2
ENSG00000009724	MASP2	0
ENSG00000009780	FAM76A	0
ENSG00000009790	TRAF3IP3	33
ENSG00000009830	POMT2	0
ENSG00000009844	VTA1	0
ENSG00000009954	BAZ1B	25
ENSG00000010017	RANBP9	0
ENSG00000010072	SPRTN	1
ENSG00000010165	METTL13	2
ENSG00000010219	DYRK4	51
ENSG00000010244	ZNF207	4
ENSG00000010256	UQCRC1	9
ENSG00000010270	STARD3NL	0
ENSG00000010278	CD9	51
ENSG00000010292	NCAPD2	19
ENSG00000010318	PHF7	5
ENSG00000010322	NISCH	5
ENSG00000010327	STAB1	0
ENSG00000010404	IDS	6
ENSG00000010438	PRSS3	1
ENSG00000010539	ZNF200	1
ENSG00000010626	LRRC23	1
ENSG00000010810	FYN	10
ENSG00000010818	HIVEP2	4
ENSG00000011007	TCEB3	2
ENSG00000011009	LYPLA2	26
ENSG00000011021	CLCN6	29
ENSG00000011052	NME2	2
ENSG00000011105	TSPAN9	1
ENSG00000011114	BTBD7	3
ENSG00000011132	APBA3	0
ENSG00000011143	MKS1	0
ENSG00000011198	ABHD5	1
ENSG00000011243	AKAP8L	26
ENSG00000011258	MBTD1	3
ENSG00000011260	UTP18	16
ENSG00000011275	RNF216	4
ENSG00000011295	TTC19	1
ENSG00000011304	PTBP1	0
ENSG00000011376	LARS2	0
ENSG00000011405	PIK3C2A	0
ENSG00000011422	PLAUR	70
ENSG00000011426	ANLN	1
ENSG00000011451	WIZ	2
ENSG00000011454	RABGAP1	0
ENSG00000011478	QPCTL	0
ENSG00000011485	PPP5C	2
ENSG00000011523	CEP68	1
ENSG00000011566	MAP4K3	3
ENSG00000011590	ZBTB32	0
ENSG00000011638	TMEM159	0
ENSG00000012048	BRCA1	0
ENSG00000012061	ERCC1	5
ENSG00000012174	MBTPS2	1
ENSG00000012211	PRICKLE3	8
ENSG00000012232	EXTL3	14
ENSG00000012660	ELOVL5	28
ENSG00000012822	CALCOCO1	5
ENSG00000012963	UBR7	37
ENSG00000012983	MAP4K5	1
ENSG00000013275	PSMC4	22
ENSG00000013288	MAN2B2	0
ENSG00000013306	SLC25A39	21
ENSG00000013364	MVP	33
ENSG00000013374	NUB1	51
ENSG00000013375	PGM3	30
ENSG00000013392	RWDD2A	30
ENSG00000013441	CLK1	5
ENSG00000013503	POLR3B	0
ENSG00000013523	ANGEL1	1
ENSG00000013561	RNF14	0
ENSG00000013563	DNASE1L1	50
ENSG00000013810	TACC3	19
ENSG00000014123	UFL1	12
ENSG00000014138	POLA2	0
ENSG00000014164	ZC3H3	4
ENSG00000014216	CAPN1	0
ENSG00000014641	MDH1	40
ENSG00000014824	SLC30A9	0
ENSG00000014919	COX15	0
ENSG00000015153	YAF2	10
ENSG00000015475	BID	0
ENSG00000015532	XYLT2	0
ENSG00000015676	NUDCD3	23
ENSG00000017260	ATP2C1	42
ENSG00000017797	RALBP1	1
ENSG00000018189	RUFY3	0
ENSG00000018510	AGPS	0
ENSG00000018610	CXorf56	0
ENSG00000018869	ZNF582	57
ENSG00000019485	PRDM11	0
ENSG00000019995	ZRANB1	0
ENSG00000020129	NCDN	0
ENSG00000020181	GPR124	1
ENSG00000020426	MNAT1	4
ENSG00000020577	SAMD4A	0
ENSG00000020922	MRE11A	0
ENSG00000021355	SERPINB1	1
ENSG00000021574	SPAST	0
ENSG00000021776	AQR	0
ENSG00000022267	FHL1	0
ENSG00000022277	C20orf43	3
ENSG00000022567	SLC45A4	3
ENSG00000022840	RNF10	5
ENSG00000022976	ZNF839	0
ENSG00000023041	ZDHHC6	3
ENSG00000023191	RNH1	68
ENSG00000023228	NDUFS1	0
ENSG00000023287	RB1CC1	1
ENSG00000023318	ERP44	12
ENSG00000023330	ALAS1	22
ENSG00000023572	GLRX2	53
ENSG00000023608	SNAPC1	33
ENSG00000023697	DERA	10
ENSG00000023734	STRAP	25
ENSG00000023902	PLEKHO1	1
ENSG00000023909	GCLM	38
ENSG00000024048	UBR2	10
ENSG00000024862	CCDC28A	5
ENSG00000025156	HSF2	1
ENSG00000025293	PHF20	0
ENSG00000025434	NR1H3	0
ENSG00000025708	TYMP	33
ENSG00000025770	NCAPH2	52
ENSG00000025772	TOMM34	0
ENSG00000025796	SEC63	26
ENSG00000025800	KPNA6	0
ENSG00000026025	VIM	83
ENSG00000026036	RTEL1	76
ENSG00000026103	FAS	60
ENSG00000026297	RNASET2	0
ENSG00000026508	CD44	69
ENSG00000027001	MIPEP	0
ENSG00000027697	IFNGR1	0
ENSG00000027847	B4GALT7	0
ENSG00000028116	VRK2	4
ENSG00000028203	VEZT	9
ENSG00000028277	POU2F2	55
ENSG00000028310	BRD9	0
ENSG00000028528	SNX1	0
ENSG00000028839	TBPL1	0
ENSG00000029153	ARNTL2	1
ENSG00000029363	BCLAF1	61
ENSG00000029364	SLC39A9	0
ENSG00000029639	TFB1M	0
ENSG00000029725	RABEP1	3
ENSG00000029993	HMGB3	0
ENSG00000030066	NUP160	0
ENSG00000030110	BAK1	2
ENSG00000030582	GRN	32
ENSG00000031003	FAM13B	29
ENSG00000031081	ARHGAP31	0
ENSG00000031691	CENPQ	0
ENSG00000031698	SARS	14
ENSG00000032219	ARID4A	19
ENSG00000032389	TSSC1	4
ENSG00000032742	IFT88	2
ENSG00000033011	ALG1	9
ENSG00000033030	ZCCHC8	53
ENSG00000033050	ABCF2	2
ENSG00000033122	LRRC7	0
ENSG00000033170	FUT8	4
ENSG00000033178	UBA6	0
ENSG00000033327	GAB2	4
ENSG00000033800	PIAS1	4
ENSG00000033867	SLC4A7	0
ENSG00000034063	UHRF1	12
ENSG00000034152	MAP2K3	70
ENSG00000034510	TMSB10	8
ENSG00000034533	ASTE1	1
ENSG00000034677	RNF19A	0
ENSG00000034693	PEX3	0
ENSG00000034713	GABARAPL2	0
ENSG00000035115	SH3YL1	6
ENSG00000035403	VCL	1
ENSG00000035499	DEPDC1B	33
ENSG00000035664	DAPK2	71
ENSG00000035681	NSMAF	42
ENSG00000035687	ADSS	0
ENSG00000035928	RFC1	6
ENSG00000036054	TBC1D23	2
ENSG00000036257	CUL3	3
ENSG00000036448	MYOM2	0
ENSG00000036549	ZZZ3	4
ENSG00000037042	TUBG2	0
ENSG00000037241	RPL26L1	2
ENSG00000037474	NSUN2	17
ENSG00000037637	FBXO42	0
ENSG00000037749	MFAP3	45
ENSG00000037757	MRI1	0
ENSG00000037897	METTL1	2
ENSG00000038002	AGA	1
ENSG00000038210	PI4K2B	15
ENSG00000038219	BOD1L1	6
ENSG00000038358	EDC4	0
ENSG00000038382	TRIO	3
ENSG00000038532	CLEC16A	4
ENSG00000039123	SKIV2L2	22
ENSG00000039319	ZFYVE16	42
ENSG00000039523	FAM65A	15
ENSG00000039650	PNKP	0
ENSG00000040199	PHLPP2	0
ENSG00000040275	CCDC99	0
ENSG00000040341	STAU2	10
ENSG00000040487	PQLC2	0
ENSG00000040531	CTNS	0
ENSG00000040633	PHF23	52
ENSG00000040933	INPP4A	73
ENSG00000041357	PSMA4	13
ENSG00000041802	LSG1	0
ENSG00000041880	PARP3	0
ENSG00000042062	FAM65C	0
ENSG00000042088	TDP1	0
ENSG00000042317	SPATA7	0
ENSG00000042429	MED17	0
ENSG00000042445	RETSAT	0
ENSG00000042493	CAPG	56
ENSG00000042753	AP2S1	50
ENSG00000043093	DCUN1D1	5
ENSG00000043143	PHF15	3
ENSG00000043514	TRIT1	0
ENSG00000044090	CUL7	0
ENSG00000044115	CTNNA1	40
ENSG00000044446	PHKA2	0
ENSG00000044574	HSPA5	12
ENSG00000046647	GEMIN8	0
ENSG00000046651	OFD1	0
ENSG00000046653	GPM6B	1
ENSG00000047056	WDR37	3
ENSG00000047188	YTHDC2	0
ENSG00000047230	CTPS2	0
ENSG00000047249	ATP6V1H	1
ENSG00000047315	POLR2B	4
ENSG00000047346	FAM214A	1
ENSG00000047410	TPR	6
ENSG00000047457	CP	3
ENSG00000047578	KIAA0556	3
ENSG00000047579	DTNBP1	4
ENSG00000047621	C12orf4	0
ENSG00000047634	SCML1	37
ENSG00000047644	WWC3	76
ENSG00000047648	ARHGAP6	71
ENSG00000047849	MAP4	0
ENSG00000047932	GOPC	0
ENSG00000048028	USP28	0
ENSG00000048140	TSPAN17	0
ENSG00000048162	NOP16	2
ENSG00000048342	CC2D2A	3
ENSG00000048392	RRM2B	5
ENSG00000048405	ZNF800	1
ENSG00000048471	SNX29	4
ENSG00000048544	MRPS10	1
ENSG00000048649	RSF1	10
ENSG00000048707	VPS13D	0
ENSG00000048828	FAM120A	0
ENSG00000048991	R3HDM1	4
ENSG00000049167	ERCC8	3
ENSG00000049192	ADAMTS6	3
ENSG00000049239	H6PD	1
ENSG00000049245	VAMP3	9
ENSG00000049247	UTS2	0
ENSG00000049449	RCN1	51
ENSG00000049541	RFC2	0
ENSG00000049656	CLPTM1L	27
ENSG00000049759	NEDD4L	27
ENSG00000049769	PPP1R3F	46
ENSG00000049860	HEXB	0
ENSG00000049883	PTCD2	0
ENSG00000050130	JKAMP	58
ENSG00000050344	NFE2L3	1
ENSG00000050393	CCDC90A	0
ENSG00000050426	LETMD1	0
ENSG00000050748	MAPK9	6
ENSG00000051009	FAM160A2	0
ENSG00000051108	HERPUD1	14
ENSG00000051180	RAD51	28
ENSG00000051382	PIK3CB	13
ENSG00000051523	CYBA	9
ENSG00000051596	THOC3	1
ENSG00000051620	HEBP2	5
ENSG00000051825	MPHOSPH9	1
ENSG00000052723	SIKE1	0
ENSG00000052749	RRP12	2
ENSG00000052795	FNIP2	54
ENSG00000052802	MSMO1	29
ENSG00000052841	TTC17	4
ENSG00000053372	MRTO4	2
ENSG00000053438	NNAT	0
ENSG00000053501	USE1	0
ENSG00000053702	NRIP2	9
ENSG00000053770	AP5M1	37
ENSG00000053900	ANAPC4	23
ENSG00000053918	KCNQ1	1
ENSG00000054116	TRAPPC3	0
ENSG00000054118	THRAP3	3
ENSG00000054148	PHPT1	8
ENSG00000054267	ARID4B	2
ENSG00000054277	OPN3	61
ENSG00000054392	HHAT	18
ENSG00000054523	KIF1B	0
ENSG00000054611	TBC1D22A	4
ENSG00000054690	PLEKHH1	0
ENSG00000054965	FAM168A	3
ENSG00000054967	RELT	0
ENSG00000055044	NOP58	16
ENSG00000055070	C1orf144	1
ENSG00000055130	CUL1	0
ENSG00000055147	FAM114A2	0
ENSG00000055208	TAB2	40
ENSG00000055211	C6orf72	0
ENSG00000055332	EIF2AK2	15
ENSG00000055483	USP36	0
ENSG00000055609	MLL3	3
ENSG00000055917	PUM2	1
ENSG00000055950	MRPL43	0
ENSG00000056050	C4orf27	0
ENSG00000056097	ZFR	49
ENSG00000056277	ZNF280C	0
ENSG00000056661	PCGF2	13
ENSG00000056736	IL17RB	0
ENSG00000056972	TRAF3IP2	0
ENSG00000057252	SOAT1	0
ENSG00000057608	GDI2	32
ENSG00000057663	ATG5	4
ENSG00000057704	TMCC3	2
ENSG00000057757	PITHD1	36
ENSG00000057935	MTA3	10
ENSG00000058056	USP13	4
ENSG00000058063	ATP11B	5
ENSG00000058091	CDK14	27
ENSG00000058262	SEC61A1	12
ENSG00000058272	PPP1R12A	3
ENSG00000058600	POLR3E	0
ENSG00000058673	ZC3H11A	43
ENSG00000058729	RIOK2	17
ENSG00000058799	YIPF1	0
ENSG00000058804	TMEM48	2
ENSG00000058866	DGKG	1
ENSG00000059122	FLYWCH1	1
ENSG00000059145	UNKL	5
ENSG00000059377	TBXAS1	0
ENSG00000059573	ALDH18A1	3
ENSG00000059588	TARBP1	23
ENSG00000059691	PET112	0
ENSG00000059758	CDK17	9
ENSG00000059769	DNAJC25	2
ENSG00000059804	SLC2A3	0
ENSG00000059915	PSD	0
ENSG00000060069	CTDP1	0
ENSG00000060138	CSDA	0
ENSG00000060339	CCAR1	6
ENSG00000060491	OGFR	9
ENSG00000060642	PIGV	0
ENSG00000060688	SNRNP40	0
ENSG00000060749	QSER1	3
ENSG00000060762	BRP44L	1
ENSG00000060971	ACAA1	0
ENSG00000060982	BCAT1	12
ENSG00000061273	HDAC7	4
ENSG00000061656	SPAG4	1
ENSG00000061676	NCKAP1	0
ENSG00000061794	MRPS35	2
ENSG00000061918	GUCY1B3	19
ENSG00000061936	SFSWAP	1
ENSG00000061938	TNK2	0
ENSG00000061987	MON2	0
ENSG00000062194	GPBP1	6
ENSG00000062485	CS	10
ENSG00000062582	MRPS24	63
ENSG00000062598	ELMO2	0
ENSG00000062650	WAPAL	0
ENSG00000062716	VMP1	0
ENSG00000062725	APPBP2	10
ENSG00000062822	POLD1	24
ENSG00000063046	EIF4B	0
ENSG00000063127	SLC6A16	5
ENSG00000063169	GLTSCR1	3
ENSG00000063177	RPL18	11
ENSG00000063241	ISOC2	68
ENSG00000063245	EPN1	74
ENSG00000063322	MED29	23
ENSG00000063438	AHRR	1
ENSG00000063587	ZNF275	0
ENSG00000063601	MTMR1	0
ENSG00000063761	ADCK1	0
ENSG00000063854	HAGH	13
ENSG00000064012	CASP8	1
ENSG00000064102	ASUN	25
ENSG00000064115	TM7SF3	0
ENSG00000064225	ST3GAL6	42
ENSG00000064309	CDON	0
ENSG00000064393	HIPK2	0
ENSG00000064419	TNPO3	0
ENSG00000064489	MEF2BNB-MEF2B	0
ENSG00000064545	TMEM161A	0
ENSG00000064547	LPAR2	0
ENSG00000064601	CTSA	0
ENSG00000064607	SUGP2	23
ENSG00000064652	SNX24	1
ENSG00000064666	CNN2	0
ENSG00000064703	DDX20	0
ENSG00000064726	BTBD1	0
ENSG00000064763	FAR2	6
ENSG00000064932	SBNO2	0
ENSG00000064933	PMS1	0
ENSG00000064995	TAF11	58
ENSG00000064999	ANKS1A	4
ENSG00000065000	AP3D1	12
ENSG00000065029	ZNF76	0
ENSG00000065057	NTHL1	87
ENSG00000065060	UHRF1BP1	12
ENSG00000065135	GNAI3	10
ENSG00000065150	IPO5	25
ENSG00000065154	OAT	24
ENSG00000065183	WDR3	2
ENSG00000065268	WDR18	2
ENSG00000065413	ANKRD44	4
ENSG00000065427	KARS	13
ENSG00000065457	ADAT1	6
ENSG00000065485	PDIA5	12
ENSG00000065491	TBC1D22B	0
ENSG00000065518	NDUFB4	8
ENSG00000065526	SPEN	0
ENSG00000065534	MYLK	0
ENSG00000065548	ZC3H15	25
ENSG00000065559	MAP2K4	4
ENSG00000065613	SLK	0
ENSG00000065615	CYB5R4	0
ENSG00000065665	SEC61A2	68
ENSG00000065717	TLE2	0
ENSG00000065802	ASB1	43
ENSG00000065809	FAM107B	1
ENSG00000065833	ME1	38
ENSG00000065882	TBC1D1	32
ENSG00000065883	CDK13	26
ENSG00000065923	SLC9A7	0
ENSG00000065970	FOXJ2	0
ENSG00000065989	PDE4A	22
ENSG00000066027	PPP2R5A	44
ENSG00000066044	ELAVL1	2
ENSG00000066084	DIP2B	0
ENSG00000066117	SMARCD1	12
ENSG00000066135	KDM4A	14
ENSG00000066136	NFYC	0
ENSG00000066230	SLC9A3	0
ENSG00000066322	ELOVL1	9
ENSG00000066379	ZNRD1	34
ENSG00000066422	ZBTB11	0
ENSG00000066427	ATXN3	5
ENSG00000066557	LRRC40	0
ENSG00000066583	ISOC1	2
ENSG00000066651	TRMT11	0
ENSG00000066654	THUMPD1	0
ENSG00000066697	MSANTD3	42
ENSG00000066777	ARFGEF1	34
ENSG00000066827	ZFAT	18
ENSG00000066855	MTFR1	0
ENSG00000066926	FECH	0
ENSG00000066933	MYO9A	4
ENSG00000067064	IDI1	29
ENSG00000067066	SP100	0
ENSG00000067082	KLF6	0
ENSG00000067113	PPAP2A	1
ENSG00000067167	TRAM1	12
ENSG00000067182	TNFRSF1A	0
ENSG00000067208	EVI5	4
ENSG00000067221	STOML1	51
ENSG00000067225	PKM	0
ENSG00000067248	DHX29	0
ENSG00000067334	DNTTIP2	38
ENSG00000067369	TP53BP1	2
ENSG00000067445	TRO	0
ENSG00000067533	RRP15	2
ENSG00000067560	RHOA	67
ENSG00000067596	DHX8	0
ENSG00000067601	PMS2P4	0
ENSG00000067704	IARS2	58
ENSG00000067715	SYT1	78
ENSG00000067829	IDH3G	9
ENSG00000067836	ROGDI	1
ENSG00000067900	ROCK1	6
ENSG00000067955	CBFB	37
ENSG00000067992	PDK3	0
ENSG00000068001	HYAL2	9
ENSG00000068024	HDAC4	4
ENSG00000068028	RASSF1	14
ENSG00000068079	IFI35	15
ENSG00000068120	COASY	1
ENSG00000068305	MEF2A	3
ENSG00000068308	OTUD5	5
ENSG00000068323	TFE3	0
ENSG00000068354	TBC1D25	1
ENSG00000068366	ACSL4	11
ENSG00000068383	INPP5A	51
ENSG00000068394	GPKOW	1
ENSG00000068400	GRIPAP1	3
ENSG00000068438	FTSJ1	68
ENSG00000068650	ATP11A	4
ENSG00000068654	POLR1A	2
ENSG00000068697	LAPTM4A	3
ENSG00000068724	TTC7A	10
ENSG00000068745	IP6K2	1
ENSG00000068784	SRBD1	18
ENSG00000068793	CYFIP1	1
ENSG00000068878	PSME4	1
ENSG00000068885	IFT80	1
ENSG00000068903	SIRT2	13
ENSG00000068912	ERLEC1	1
ENSG00000068971	PPP2R5B	0
ENSG00000069020	MAST4	4
ENSG00000069248	NUP133	3
ENSG00000069275	NUCKS1	3
ENSG00000069329	VPS35	0
ENSG00000069345	DNAJA2	10
ENSG00000069399	BCL3	32
ENSG00000069493	CLEC2D	0
ENSG00000069509	FUNDC1	9
ENSG00000069667	RORA	10
ENSG00000069702	TGFBR3	0
ENSG00000069849	ATP1B3	67
ENSG00000069869	NEDD4	0
ENSG00000069943	PIGB	5
ENSG00000069956	MAPK6	1
ENSG00000069974	RAB27A	0
ENSG00000069998	CECR5	2
ENSG00000070010	UFD1L	80
ENSG00000070018	LRP6	1
ENSG00000070047	PHRF1	0
ENSG00000070061	IKBKAP	0
ENSG00000070081	NUCB2	30
ENSG00000070087	PFN2	1
ENSG00000070214	SLC44A1	0
ENSG00000070269	C14orf101	0
ENSG00000070366	SMG6	73
ENSG00000070367	EXOC5	49
ENSG00000070404	FSTL3	32
ENSG00000070413	DGCR2	0
ENSG00000070423	RNF126	2
ENSG00000070444	MNT	0
ENSG00000070476	ZXDC	57
ENSG00000070495	JMJD6	22
ENSG00000070501	POLB	5
ENSG00000070540	WIPI1	64
ENSG00000070610	GBA2	4
ENSG00000070614	NDST1	3
ENSG00000070669	ASNS	14
ENSG00000070718	AP3M2	0
ENSG00000070756	PABPC1	5
ENSG00000070759	TESK2	20
ENSG00000070761	C16orf80	24
ENSG00000070770	CSNK2A2	12
ENSG00000070785	EIF2B3	0
ENSG00000070814	TCOF1	16
ENSG00000070831	CDC42	0
ENSG00000070882	OSBPL3	3
ENSG00000070950	RAD18	1
ENSG00000070961	ATP2B1	0
ENSG00000071051	NCK2	3
ENSG00000071054	MAP4K4	3
ENSG00000071082	RPL31	11
ENSG00000071127	WDR1	0
ENSG00000071189	SNX13	3
ENSG00000071205	ARHGAP10	0
ENSG00000071246	VASH1	0
ENSG00000071282	LMCD1	0
ENSG00000071462	WBSCR22	52
ENSG00000071553	ATP6AP1	56
ENSG00000071626	DAZAP1	0
ENSG00000071655	MBD3	2
ENSG00000071794	HLTF	5
ENSG00000071859	FAM50A	56
ENSG00000071889	FAM3A	0
ENSG00000071894	CPSF1	0
ENSG00000071967	CYBRD1	0
ENSG00000071994	PDCD2	2
ENSG00000072042	RDH11	29
ENSG00000072062	PRKACA	0
ENSG00000072071	LPHN1	0
ENSG00000072110	ACTN1	0
ENSG00000072121	ZFYVE26	0
ENSG00000072134	EPN2	18
ENSG00000072135	PTPN18	0
ENSG00000072210	ALDH3A2	0
ENSG00000072274	TFRC	0
ENSG00000072310	SREBF1	72
ENSG00000072364	AFF4	1
ENSG00000072401	UBE2D1	0
ENSG00000072415	MPP5	1
ENSG00000072501	SMC1A	0
ENSG00000072506	HSD17B10	2
ENSG00000072518	MARK2	4
ENSG00000072571	HMMR	1
ENSG00000072609	CHFR	30
ENSG00000072682	P4HA2	1
ENSG00000072736	NFATC3	1
ENSG00000072756	TRNT1	0
ENSG00000072778	ACADVL	0
ENSG00000072786	STK10	3
ENSG00000072803	FBXW11	3
ENSG00000072818	ACAP1	0
ENSG00000072832	CRMP1	24
ENSG00000072849	DERL2	12
ENSG00000072864	NDE1	0
ENSG00000072954	TMEM38A	1
ENSG00000072958	AP1M1	0
ENSG00000073009	IKBKG	23
ENSG00000073050	XRCC1	0
ENSG00000073060	SCARB1	0
ENSG00000073111	MCM2	9
ENSG00000073331	ALPK1	0
ENSG00000073417	PDE8A	10
ENSG00000073536	NLE1	2
ENSG00000073578	SDHA	24
ENSG00000073584	SMARCE1	1
ENSG00000073605	GSDMB	0
ENSG00000073614	KDM5A	5
ENSG00000073849	ST6GAL1	4
ENSG00000073910	FRY	0
ENSG00000073921	PICALM	3
ENSG00000073969	NSF	0
ENSG00000074054	CLASP1	10
ENSG00000074071	MRPS34	2
ENSG00000074201	CLNS1A	0
ENSG00000074219	TEAD2	0
ENSG00000074266	EED	0
ENSG00000074319	TSG101	22
ENSG00000074356	C17orf85	43
ENSG00000074416	MGLL	53
ENSG00000074582	BCS1L	2
ENSG00000074603	DPP8	0
ENSG00000074621	SLC24A1	50
ENSG00000074657	ZNF532	0
ENSG00000074695	LMAN1	41
ENSG00000074696	PTPLAD1	0
ENSG00000074755	ZZEF1	0
ENSG00000074800	ENO1	2
ENSG00000074842	C19orf10	12
ENSG00000074935	TUBE1	14
ENSG00000074964	ARHGEF10L	24
ENSG00000075089	ACTR6	0
ENSG00000075131	TIPIN	0
ENSG00000075142	SRI	32
ENSG00000075151	EIF4G3	3
ENSG00000075188	NUP37	1
ENSG00000075234	TTC38	15
ENSG00000075240	GRAMD4	30
ENSG00000075292	ZNF638	10
ENSG00000075303	SLC25A40	0
ENSG00000075336	TIMM21	16
ENSG00000075399	C16orf7	33
ENSG00000075407	ZNF37A	0
ENSG00000075413	MARK3	48
ENSG00000075415	SLC25A3	3
ENSG00000075420	FNDC3B	40
ENSG00000075426	FOSL2	0
ENSG00000075539	FRYL	3
ENSG00000075624	ACTB	75
ENSG00000075651	PLD1	36
ENSG00000075702	WDR62	1
ENSG00000075711	DLG1	3
ENSG00000075785	RAB7A	1
ENSG00000075790	BCAP29	0
ENSG00000075826	SEC31B	8
ENSG00000075856	SART3	12
ENSG00000075886	TUBA3D	0
ENSG00000075914	EXOSC7	2
ENSG00000075945	KIFAP3	0
ENSG00000075975	MKRN2	0
ENSG00000076003	MCM6	0
ENSG00000076043	REXO2	0
ENSG00000076067	RBMS2	1
ENSG00000076108	BAZ2A	0
ENSG00000076201	PTPN23	0
ENSG00000076242	MLH1	0
ENSG00000076248	UNG	2
ENSG00000076258	FMO4	0
ENSG00000076351	SLC46A1	0
ENSG00000076382	SPAG5	0
ENSG00000076513	ANKRD13A	0
ENSG00000076554	TPD52	3
ENSG00000076604	TRAF4	70
ENSG00000076650	GPATCH1	0
ENSG00000076662	ICAM3	0
ENSG00000076685	NT5C2	18
ENSG00000076706	MCAM	0
ENSG00000076770	MBNL3	18
ENSG00000076924	XAB2	0
ENSG00000076928	ARHGEF1	0
ENSG00000076944	STXBP2	31
ENSG00000076984	MAP2K7	0
ENSG00000077044	DGKD	1
ENSG00000077092	RARB	1
ENSG00000077097	TOP2B	6
ENSG00000077147	TM9SF3	6
ENSG00000077150	NFKB2	0
ENSG00000077152	UBE2T	0
ENSG00000077157	PPP1R12B	10
ENSG00000077232	DNAJC10	41
ENSG00000077235	GTF3C1	1
ENSG00000077238	IL4R	0
ENSG00000077254	USP33	0
ENSG00000077312	SNRPA	14
ENSG00000077327	SPAG6	0
ENSG00000077348	EXOSC5	0
ENSG00000077380	DYNC1I2	9
ENSG00000077454	LRCH4	0
ENSG00000077458	FAM76B	0
ENSG00000077463	SIRT6	0
ENSG00000077514	POLD3	0
ENSG00000077549	CAPZB	12
ENSG00000077585	GPR137B	0
ENSG00000077616	NAALAD2	1
ENSG00000077684	PHF17	69
ENSG00000077713	SLC25A43	0
ENSG00000077721	UBE2A	0
ENSG00000077782	FGFR1	13
ENSG00000077809	GTF2I	48
ENSG00000078070	MCCC1	6
ENSG00000078124	ACER3	72
ENSG00000078140	UBE2K	1
ENSG00000078142	PIK3C3	6
ENSG00000078177	N4BP2	26
ENSG00000078237	C12orf5	0
ENSG00000078246	TULP3	26
ENSG00000078269	SYNJ2	3
ENSG00000078319	PMS2P1	34
ENSG00000078369	GNB1	18
ENSG00000078403	MLLT10	3
ENSG00000078618	NRD1	0
ENSG00000078674	PCM1	5
ENSG00000078687	TNRC6C	1
ENSG00000078699	CBFA2T2	3
ENSG00000078747	ITCH	41
ENSG00000078804	TP53INP2	0
ENSG00000078808	SDF4	1
ENSG00000078814	MYH7B	0
ENSG00000078902	TOLLIP	0
ENSG00000078967	UBE2D4	0
ENSG00000079134	THOC1	1
ENSG00000079150	FKBP7	0
ENSG00000079246	XRCC5	25
ENSG00000079257	LXN	17
ENSG00000079263	SP140	15
ENSG00000079313	REXO1	0
ENSG00000079332	SAR1A	3
ENSG00000079335	CDC14A	44
ENSG00000079385	CEACAM1	0
ENSG00000079387	SENP1	0
ENSG00000079432	CIC	0
ENSG00000079435	LIPE	0
ENSG00000079459	FDFT1	29
ENSG00000079462	PAFAH1B3	52
ENSG00000079616	KIF22	0
ENSG00000079691	LRRC16A	69
ENSG00000079739	PGM1	0
ENSG00000079785	DDX1	17
ENSG00000079805	DNM2	1
ENSG00000079819	EPB41L2	1
ENSG00000079950	STX7	0
ENSG00000079999	KEAP1	54
ENSG00000080189	SLC35C2	0
ENSG00000080200	CRYBG3	13
ENSG00000080345	RIF1	0
ENSG00000080371	RAB21	3
ENSG00000080503	SMARCA2	19
ENSG00000080546	SESN1	46
ENSG00000080603	SRCAP	3
ENSG00000080608	KIAA0020	0
ENSG00000080618	CPB2	1
ENSG00000080644	CHRNA3	0
ENSG00000080802	CNOT4	3
ENSG00000080815	PSEN1	16
ENSG00000080819	CPOX	6
ENSG00000080822	CLDND1	6
ENSG00000080824	HSP90AA1	22
ENSG00000080839	RBL1	0
ENSG00000080947	CROCCP3	1
ENSG00000080986	NDC80	0
ENSG00000081014	AP4E1	43
ENSG00000081019	RSBN1	0
ENSG00000081026	MAGI3	10
ENSG00000081059	TCF7	44
ENSG00000081087	OSTM1	85
ENSG00000081154	PCNP	6
ENSG00000081177	EXD2	0
ENSG00000081181	ARG2	49
ENSG00000081189	MEF2C	4
ENSG00000081307	UBA5	41
ENSG00000081320	STK17B	0
ENSG00000081377	CDC14B	1
ENSG00000081386	ZNF510	13
ENSG00000081692	JMJD4	5
ENSG00000081721	DUSP12	12
ENSG00000081760	AACS	0
ENSG00000081870	HSPB11	11
ENSG00000081913	PHLPP1	3
ENSG00000081923	ATP8B1	0
ENSG00000082014	SMARCD3	0
ENSG00000082068	WDR70	4
ENSG00000082146	STRADB	0
ENSG00000082153	BZW1	49
ENSG00000082196	C1QTNF3	0
ENSG00000082212	ME2	17
ENSG00000082213	C5orf22	0
ENSG00000082258	CCNT2	43
ENSG00000082269	FAM135A	0
ENSG00000082458	DLG3	0
ENSG00000082512	TRAF5	0
ENSG00000082515	MRPL22	85
ENSG00000082516	GEMIN5	2
ENSG00000082641	NFE2L1	28
ENSG00000082701	GSK3B	3
ENSG00000082805	ERC1	4
ENSG00000082898	XPO1	0
ENSG00000082996	RNF13	78
ENSG00000083093	PALB2	17
ENSG00000083097	DOPEY1	0
ENSG00000083123	BCKDHB	4
ENSG00000083168	KAT6A	0
ENSG00000083223	ZCCHC6	0
ENSG00000083312	TNPO1	38
ENSG00000083444	PLOD1	44
ENSG00000083520	DIS3	41
ENSG00000083535	PIBF1	4
ENSG00000083544	TDRD3	18
ENSG00000083635	NUFIP1	2
ENSG00000083642	PDS5B	3
ENSG00000083720	OXCT1	0
ENSG00000083750	RRAGB	2
ENSG00000083799	CYLD	0
ENSG00000083812	ZNF324	1
ENSG00000083814	ZNF671	0
ENSG00000083817	ZNF416	0
ENSG00000083838	ZNF446	0
ENSG00000083842	ZNF8	0
ENSG00000083844	ZNF264	0
ENSG00000083845	RPS5	11
ENSG00000083896	YTHDC1	6
ENSG00000084070	SMAP2	66
ENSG00000084072	PPIE	0
ENSG00000084090	STARD7	3
ENSG00000084092	NOA1	0
ENSG00000084093	REST	2
ENSG00000084444	KIAA1467	0
ENSG00000084463	WBP11	40
ENSG00000084623	EIF3I	2
ENSG00000084652	TXLNA	10
ENSG00000084676	NCOA1	3
ENSG00000084693	AGBL5	0
ENSG00000084731	KIF3C	1
ENSG00000084754	HADHA	67
ENSG00000084764	MAPRE3	9
ENSG00000084774	CAD	1
ENSG00000085063	CD59	12
ENSG00000085185	BCORL1	1
ENSG00000085224	ATRX	6
ENSG00000085274	MYNN	0
ENSG00000085365	SCAMP1	3
ENSG00000085377	PREP	33
ENSG00000085382	HACE1	2
ENSG00000085433	WDR47	1
ENSG00000085449	WDFY1	24
ENSG00000085465	OVGP1	0
ENSG00000085491	SLC25A24	13
ENSG00000085514	PILRA	36
ENSG00000085644	ZNF213	0
ENSG00000085662	AKR1B1	54
ENSG00000085719	CPNE3	37
ENSG00000085721	RRN3	10
ENSG00000085733	CTTN	0
ENSG00000085760	MTIF2	0
ENSG00000085832	EPS15	0
ENSG00000085840	ORC1	1
ENSG00000085871	MGST2	7
ENSG00000085872	CHERP	2
ENSG00000085978	ATG16L1	0
ENSG00000085982	USP40	0
ENSG00000085998	POMGNT1	1
ENSG00000085999	RAD54L	28
ENSG00000086061	DNAJA1	22
ENSG00000086062	B4GALT1	39
ENSG00000086065	CHMP5	1
ENSG00000086102	NFX1	0
ENSG00000086189	DIMT1	25
ENSG00000086200	IPO11	1
ENSG00000086232	EIF2AK1	13
ENSG00000086475	SEPHS1	0
ENSG00000086504	MRPL28	21
ENSG00000086544	ITPKC	14
ENSG00000086589	RBM22	0
ENSG00000086598	TMED2	27
ENSG00000086619	ERO1LB	26
ENSG00000086666	ZFAND6	44
ENSG00000086712	TXLNG	22
ENSG00000086827	ZW10	0
ENSG00000086848	ALG9	0
ENSG00000087008	ACOX3	0
ENSG00000087053	MTMR2	1
ENSG00000087074	PPP1R15A	14
ENSG00000087076	HSD17B14	1
ENSG00000087077	TRIP6	0
ENSG00000087086	FTL	38
ENSG00000087087	SRRT	16
ENSG00000087088	BAX	11
ENSG00000087095	NLK	4
ENSG00000087111	PIGS	0
ENSG00000087152	ATXN7L3	9
ENSG00000087157	PGS1	11
ENSG00000087191	PSMC5	16
ENSG00000087206	UIMC1	0
ENSG00000087263	OGFOD1	0
ENSG00000087266	SH3BP2	32
ENSG00000087269	NOP14	2
ENSG00000087274	ADD1	1
ENSG00000087299	L2HGDH	28
ENSG00000087301	TXNDC16	1
ENSG00000087302	C14orf166	0
ENSG00000087303	NID2	1
ENSG00000087338	GMCL1	19
ENSG00000087365	SF3B2	27
ENSG00000087448	KLHDC5	0
ENSG00000087460	GNAS	36
ENSG00000087470	DNM1L	61
ENSG00000087502	ERGIC2	3
ENSG00000087586	AURKA	1
ENSG00000087842	PIR	54
ENSG00000087884	C11orf67	1
ENSG00000087995	METTL2A	0
ENSG00000088035	ALG6	23
ENSG00000088038	CNOT3	12
ENSG00000088205	DDX18	27
ENSG00000088247	KHSRP	2
ENSG00000088256	GNA11	1
ENSG00000088298	EDEM2	0
ENSG00000088356	PDRG1	0
ENSG00000088387	DOCK9	3
ENSG00000088448	ANKRD10	6
ENSG00000088451	TGDS	12
ENSG00000088543	C3orf18	0
ENSG00000088682	COQ9	1
ENSG00000088727	KIF9	0
ENSG00000088766	CRLS1	0
ENSG00000088808	PPP1R13B	1
ENSG00000088812	ATRN	33
ENSG00000088826	SMOX	0
ENSG00000088832	FKBP1A	0
ENSG00000088833	NSFL1C	0
ENSG00000088854	C20orf194	1
ENSG00000088876	ZNF343	2
ENSG00000088888	MAVS	0
ENSG00000088930	XRN2	10
ENSG00000088970	PLK1S1	5
ENSG00000088986	DYNLL1	8
ENSG00000089006	SNX5	25
ENSG00000089009	RPL6	11
ENSG00000089022	MAPKAPK5	0
ENSG00000089048	ESF1	2
ENSG00000089053	ANAPC5	0
ENSG00000089057	SLC23A2	0
ENSG00000089060	SLC24A6	1
ENSG00000089063	TMEM230	9
ENSG00000089091	DZANK1	9
ENSG00000089123	TASP1	4
ENSG00000089154	GCN1L1	0
ENSG00000089157	RPLP0	74
ENSG00000089159	PXN	51
ENSG00000089163	SIRT4	0
ENSG00000089177	KIF16B	0
ENSG00000089195	TRMT6	75
ENSG00000089220	PEBP1	2
ENSG00000089234	BRAP	0
ENSG00000089248	ERP29	1
ENSG00000089280	FUS	48
ENSG00000089289	IGBP1	0
ENSG00000089327	FXYD5	0
ENSG00000089335	ZNF302	64
ENSG00000089351	GRAMD1A	1
ENSG00000089486	C16orf5	1
ENSG00000089505	CMTM1	1
ENSG00000089597	GANAB	23
ENSG00000089639	GMIP	39
ENSG00000089682	RBM41	4
ENSG00000089693	MLF2	29
ENSG00000089737	DDX24	4
ENSG00000089775	ZBTB25	19
ENSG00000089818	NECAP1	0
ENSG00000089820	ARHGAP4	0
ENSG00000089876	DHX32	10
ENSG00000089902	RCOR1	0
ENSG00000089916	C14orf118	6
ENSG00000090006	LTBP4	0
ENSG00000090013	BLVRB	1
ENSG00000090020	SLC9A1	1
ENSG00000090054	SPTLC1	1
ENSG00000090060	PAPOLA	49
ENSG00000090061	CCNK	4
ENSG00000090097	PCBP4	0
ENSG00000090238	YPEL3	5
ENSG00000090263	MRPS33	8
ENSG00000090266	NDUFB2	11
ENSG00000090273	NUDC	0
ENSG00000090316	MAEA	0
ENSG00000090372	STRN4	0
ENSG00000090376	IRAK3	65
ENSG00000090432	MUL1	9
ENSG00000090447	TFAP4	2
ENSG00000090470	PDCD7	0
ENSG00000090487	SPG21	56
ENSG00000090520	DNAJB11	12
ENSG00000090554	FLT3LG	0
ENSG00000090565	RAB11FIP3	0
ENSG00000090581	GNPTG	0
ENSG00000090615	GOLGA3	30
ENSG00000090621	PABPC4	0
ENSG00000090661	CERS4	0
ENSG00000090674	MCOLN1	0
ENSG00000090686	USP48	5
ENSG00000090857	PDPR	0
ENSG00000090861	AARS	14
ENSG00000090905	TNRC6A	3
ENSG00000090924	PLEKHG2	0
ENSG00000090971	NAT14	0
ENSG00000090975	PITPNM2	4
ENSG00000090989	EXOC1	80
ENSG00000091009	RBM27	0
ENSG00000091039	OSBPL8	1
ENSG00000091073	DTX2	36
ENSG00000091106	NLRC4	20
ENSG00000091127	PUS7	2
ENSG00000091136	LAMB1	0
ENSG00000091157	WDR7	3
ENSG00000091164	TXNL1	38
ENSG00000091317	CMTM6	32
ENSG00000091409	ITGA6	37
ENSG00000091436	AC013461.1	36
ENSG00000091483	FH	1
ENSG00000091490	SEL1L3	2
ENSG00000091527	CDV3	25
ENSG00000091542	ALKBH5	0
ENSG00000091592	NLRP1	0
ENSG00000091640	SPAG7	56
ENSG00000091651	ORC6	0
ENSG00000091732	ZC3HC1	0
ENSG00000091879	ANGPT2	3
ENSG00000091947	TMEM101	1
ENSG00000092010	PSME1	1
ENSG00000092020	PPP2R3C	0
ENSG00000092036	HAUS4	0
ENSG00000092094	OSGEP	0
ENSG00000092098	RNF31	0
ENSG00000092108	SCFD1	26
ENSG00000092140	G2E3	0
ENSG00000092148	HECTD1	8
ENSG00000092199	HNRNPC	9
ENSG00000092201	SUPT16H	25
ENSG00000092203	TOX4	0
ENSG00000092208	GEMIN2	1
ENSG00000092330	TINF2	1
ENSG00000092439	TRPM7	6
ENSG00000092470	WDR76	24
ENSG00000092531	SNAP23	6
ENSG00000092621	PHGDH	14
ENSG00000092820	EZR	0
ENSG00000092841	MYL6	30
ENSG00000092847	EIF2C1	71
ENSG00000092871	RFFL	3
ENSG00000092931	MFSD11	2
ENSG00000092964	DPYSL2	1
ENSG00000092969	TGFB2	1
ENSG00000092978	GPATCH2	3
ENSG00000093000	NUP50	0
ENSG00000093010	COMT	0
ENSG00000093100	XXbac-B461K10.4	0
ENSG00000093144	ECHDC1	1
ENSG00000093183	SEC22C	0
ENSG00000093217	XYLB	1
ENSG00000094631	HDAC6	0
ENSG00000094804	CDC6	0
ENSG00000094841	UPRT	0
ENSG00000094880	CDC23	0
ENSG00000094914	AAAS	0
ENSG00000094916	CBX5	36
ENSG00000094975	C1orf9	0
ENSG00000095002	MSH2	6
ENSG00000095059	DHPS	0
ENSG00000095066	HOOK2	0
ENSG00000095139	ARCN1	12
ENSG00000095209	TMEM38B	0
ENSG00000095261	PSMD5	0
ENSG00000095321	CRAT	0
ENSG00000095380	NANS	12
ENSG00000095485	CWF19L1	54
ENSG00000095539	SEMA4G	0
ENSG00000095564	BTAF1	0
ENSG00000095574	IKZF5	5
ENSG00000095787	WAC	3
ENSG00000095906	NUBP2	0
ENSG00000095951	HIVEP1	4
ENSG00000096060	FKBP5	66
ENSG00000096063	SRPK1	1
ENSG00000096070	BRPF3	0
ENSG00000096080	MRPS18A	6
ENSG00000096092	TMEM14A	0
ENSG00000096093	EFHC1	6
ENSG00000096384	HSP90AB1	22
ENSG00000096401	CDC5L	10
ENSG00000096433	ITPR3	76
ENSG00000096654	ZNF184	0
ENSG00000096717	SIRT1	20
ENSG00000096746	HNRNPH3	6
ENSG00000096872	IFT74	0
ENSG00000096968	JAK2	33
ENSG00000097007	ABL1	4
ENSG00000097033	SH3GLB1	0
ENSG00000097046	CDC7	0
ENSG00000099194	SCD	29
ENSG00000099203	TMED1	0
ENSG00000099204	ABLIM1	5
ENSG00000099246	RAB18	38
ENSG00000099251	HSD17B7P2	0
ENSG00000099256	PRTFDC1	78
ENSG00000099282	TSPAN15	0
ENSG00000099290	FAM21A	0
ENSG00000099308	MAST3	0
ENSG00000099326	MZF1	0
ENSG00000099330	OCEL1	1
ENSG00000099331	MYO9B	0
ENSG00000099337	KCNK6	0
ENSG00000099338	CATSPERG	0
ENSG00000099341	PSMD8	63
ENSG00000099364	FBXL19	0
ENSG00000099381	SETD1A	0
ENSG00000099385	BCL7C	74
ENSG00000099624	ATP5D	21
ENSG00000099783	HNRNPM	61
ENSG00000099785	2016-03-02	0
ENSG00000099800	TIMM13	2
ENSG00000099804	CDC34	0
ENSG00000099810	MTAP	0
ENSG00000099817	POLR2E	21
ENSG00000099821	POLRMT	0
ENSG00000099834	CDHR5	0
ENSG00000099840	IZUMO4	0
ENSG00000099849	RASSF7	7
ENSG00000099875	MKNK2	0
ENSG00000099889	ARVCF	9
ENSG00000099899	TRMT2A	2
ENSG00000099901	RANBP1	2
ENSG00000099904	ZDHHC8	0
ENSG00000099910	KLHL22	4
ENSG00000099937	SERPIND1	0
ENSG00000099940	SNAP29	0
ENSG00000099942	CRKL	0
ENSG00000099949	LZTR1	0
ENSG00000099956	SMARCB1	1
ENSG00000099968	BCL2L13	3
ENSG00000099974	DDTL	0
ENSG00000099977	DDT	35
ENSG00000099991	CABIN1	16
ENSG00000099992	TBC1D10A	44
ENSG00000099995	SF3A1	0
ENSG00000099999	RNF215	0
ENSG00000100003	SEC14L2	0
ENSG00000100014	SPECC1L	0
ENSG00000100023	PPIL2	0
ENSG00000100027	YPEL1	5
ENSG00000100028	SNRPD3	16
ENSG00000100029	PES1	2
ENSG00000100030	MAPK1	0
ENSG00000100034	PPM1F	53
ENSG00000100038	TOP3B	0
ENSG00000100056	DGCR14	0
ENSG00000100058	CRYBB2P1	31
ENSG00000100068	LRP5L	84
ENSG00000100075	SLC25A1	21
ENSG00000100077	ADRBK2	0
ENSG00000100083	GGA1	39
ENSG00000100084	HIRA	3
ENSG00000100092	SH3BP1	0
ENSG00000100097	LGALS1	56
ENSG00000100100	PIK3IP1	59
ENSG00000100101	RP1-37E16.12	8
ENSG00000100104	SRRD	2
ENSG00000100105	PATZ1	0
ENSG00000100124	ANKRD54	0
ENSG00000100129	EIF3L	0
ENSG00000100138	NHP2L1	8
ENSG00000100139	MICALL1	1
ENSG00000100146	SOX10	0
ENSG00000100147	CCDC134	1
ENSG00000100150	DEPDC5	0
ENSG00000100151	PICK1	0
ENSG00000100154	TTC28	18
ENSG00000100162	CENPM	0
ENSG00000100196	KDELR3	0
ENSG00000100201	DDX17	43
ENSG00000100207	TCF20	3
ENSG00000100209	HSCB	0
ENSG00000100211	CBY1	1
ENSG00000100216	TOMM22	2
ENSG00000100218	RTDR1	0
ENSG00000100219	XBP1	14
ENSG00000100220	C22orf28	13
ENSG00000100225	FBXO7	0
ENSG00000100226	GTPBP1	0
ENSG00000100227	POLDIP3	0
ENSG00000100239	PPP6R2	76
ENSG00000100241	SBF1	0
ENSG00000100243	CYB5R3	9
ENSG00000100258	LMF2	21
ENSG00000100263	RHBDD3	31
ENSG00000100266	PACSIN2	0
ENSG00000100271	TTLL1	1
ENSG00000100280	AP1B1	0
ENSG00000100281	HMGXB4	3
ENSG00000100284	TOM1	0
ENSG00000100288	CHKB	1
ENSG00000100292	HMOX1	38
ENSG00000100294	MCAT	0
ENSG00000100296	THOC5	0
ENSG00000100297	MCM5	24
ENSG00000100299	ARSA	0
ENSG00000100300	TSPO	87
ENSG00000100304	TTLL12	5
ENSG00000100307	CBX7	5
ENSG00000100316	RPL3	1
ENSG00000100319	ZMAT5	23
ENSG00000100320	RBFOX2	1
ENSG00000100325	ASCC2	17
ENSG00000100330	MTMR3	3
ENSG00000100335	SMCR7L	47
ENSG00000100345	MYH9	0
ENSG00000100347	SAMM50	0
ENSG00000100348	TXN2	0
ENSG00000100350	FOXRED2	0
ENSG00000100353	EIF3D	27
ENSG00000100354	TNRC6B	10
ENSG00000100359	SGSM3	31
ENSG00000100360	IFT27	0
ENSG00000100364	KIAA0930	0
ENSG00000100372	SLC25A17	1
ENSG00000100379	KCTD17	9
ENSG00000100380	ST13	0
ENSG00000100387	RBX1	8
ENSG00000100393	EP300	76
ENSG00000100399	CHADL	0
ENSG00000100401	RANGAP1	0
ENSG00000100403	ZC3H7B	13
ENSG00000100410	PHF5A	2
ENSG00000100412	ACO2	0
ENSG00000100413	POLR3H	2
ENSG00000100417	PMM1	0
ENSG00000100418	DESI1	0
ENSG00000100422	CERK	37
ENSG00000100425	BRD1	0
ENSG00000100426	ZBED4	2
ENSG00000100429	HDAC10	0
ENSG00000100439	ABHD4	38
ENSG00000100441	KHNYN	0
ENSG00000100442	FKBP3	0
ENSG00000100445	SDR39U1	0
ENSG00000100461	RBM23	0
ENSG00000100473	COCH	1
ENSG00000100478	AP4S1	1
ENSG00000100479	POLE2	0
ENSG00000100483	METTL21D	0
ENSG00000100485	SOS2	13
ENSG00000100490	CDKL1	0
ENSG00000100504	PYGL	0
ENSG00000100519	PSMC6	22
ENSG00000100522	GNPNAT1	0
ENSG00000100523	DDHD1	0
ENSG00000100526	CDKN3	1
ENSG00000100528	CNIH	0
ENSG00000100532	CGRRF1	1
ENSG00000100554	ATP6V1D	0
ENSG00000100567	PSMA3	6
ENSG00000100575	TIMM9	0
ENSG00000100577	GSTZ1	0
ENSG00000100578	KIAA0586	1
ENSG00000100583	SAMD15	1
ENSG00000100591	AHSA1	22
ENSG00000100596	SPTLC2	0
ENSG00000100599	RIN3	0
ENSG00000100600	LGMN	0
ENSG00000100601	ALKBH1	0
ENSG00000100603	SNW1	3
ENSG00000100605	ITPK1	73
ENSG00000100612	DHRS7	0
ENSG00000100614	PPM1A	71
ENSG00000100629	CEP128	0
ENSG00000100632	ERH	48
ENSG00000100644	HIF1A	0
ENSG00000100647	KIAA0247	0
ENSG00000100650	SRSF5	6
ENSG00000100652	SLC10A1	20
ENSG00000100664	EIF5	14
ENSG00000100697	DICER1	23
ENSG00000100711	ZFYVE21	24
ENSG00000100722	ZC3H14	1
ENSG00000100726	TELO2	2
ENSG00000100731	PCNX	4
ENSG00000100744	C14orf129	0
ENSG00000100764	PSMC1	16
ENSG00000100767	PAPLN	0
ENSG00000100796	SMEK1	46
ENSG00000100802	C14orf93	0
ENSG00000100804	PSMB5	16
ENSG00000100811	YY1	31
ENSG00000100813	ACIN1	0
ENSG00000100814	CCNB1IP1	0
ENSG00000100815	TRIP11	0
ENSG00000100823	APEX1	17
ENSG00000100836	PABPN1	0
ENSG00000100852	ARHGAP5	82
ENSG00000100865	CINP	8
ENSG00000100883	SRP54	41
ENSG00000100888	CHD8	0
ENSG00000100889	PCK2	14
ENSG00000100890	RP11-173D9.3	1
ENSG00000100897	DCAF11	0
ENSG00000100902	PSMA6	3
ENSG00000100906	NFKBIA	65
ENSG00000100911	PSME2	15
ENSG00000100916	BRMS1L	0
ENSG00000100918	REC8	0
ENSG00000100926	TM9SF1	0
ENSG00000100938	GMPR2	1
ENSG00000100941	PNN	40
ENSG00000100949	RABGGTA	1
ENSG00000100979	PLTP	1
ENSG00000100982	PCIF1	0
ENSG00000100983	GSS	0
ENSG00000100991	TRPC4AP	28
ENSG00000100994	PYGB	0
ENSG00000100997	ABHD12	0
ENSG00000101003	GINS1	0
ENSG00000101017	CD40	1
ENSG00000101019	UQCC	31
ENSG00000101040	ZMYND8	10
ENSG00000101052	IFT52	0
ENSG00000101079	NDRG3	1
ENSG00000101082	SLA2	0
ENSG00000101096	NFATC2	0
ENSG00000101104	PABPC1L	0
ENSG00000101109	STK4	5
ENSG00000101126	ADNP	2
ENSG00000101132	PFDN4	0
ENSG00000101138	CSTF1	3
ENSG00000101150	TPD52L2	0
ENSG00000101152	DNAJC5	3
ENSG00000101158	TH1L	2
ENSG00000101160	CTSZ	32
ENSG00000101161	PRPF6	1
ENSG00000101166	SLMO2	17
ENSG00000101181	GTPBP5	0
ENSG00000101182	PSMA7	8
ENSG00000101189	C20orf20	42
ENSG00000101190	TCFL5	0
ENSG00000101191	DIDO1	0
ENSG00000101193	C20orf11	3
ENSG00000101194	SLC17A9	0
ENSG00000101199	ARFGAP1	28
ENSG00000101216	GMEB2	1
ENSG00000101220	C20orf27	2
ENSG00000101224	CDC25B	0
ENSG00000101236	RNF24	3
ENSG00000101246	ARFRP1	32
ENSG00000101247	NDUFAF5	0
ENSG00000101266	CSNK2A1	0
ENSG00000101290	CDS2	3
ENSG00000101294	HM13	37
ENSG00000101310	SEC23B	12
ENSG00000101335	MYL9	0
ENSG00000101337	TM9SF4	0
ENSG00000101342	C20orf118	15
ENSG00000101343	CRNKL1	0
ENSG00000101346	POFUT1	47
ENSG00000101347	SAMHD1	15
ENSG00000101350	KIF3B	0
ENSG00000101353	C20orf132	0
ENSG00000101361	NOP56	2
ENSG00000101363	MANBAL	1
ENSG00000101365	IDH3B	8
ENSG00000101367	MAPRE1	40
ENSG00000101384	JAG1	0
ENSG00000101391	CDK5RAP1	0
ENSG00000101400	SNTA1	1
ENSG00000101407	TTI1	40
ENSG00000101413	RPRD1B	1
ENSG00000101417	PXMP4	0
ENSG00000101421	CHMP4B	0
ENSG00000101439	CST3	56
ENSG00000101440	ASIP	20
ENSG00000101442	ACTR5	2
ENSG00000101444	AHCY	0
ENSG00000101447	FAM83D	1
ENSG00000101452	DHX35	11
ENSG00000101457	DNTTIP1	0
ENSG00000101464	PIGU	12
ENSG00000101474	C20orf3	0
ENSG00000101493	ZNF516	0
ENSG00000101544	ADNP2	9
ENSG00000101546	RBFA	1
ENSG00000101557	USP14	22
ENSG00000101558	VAPA	15
ENSG00000101574	METTL4	1
ENSG00000101577	LPIN2	0
ENSG00000101596	SMCHD1	0
ENSG00000101608	MYL12A	50
ENSG00000101624	CEP76	1
ENSG00000101639	CEP192	10
ENSG00000101654	RNMT	6
ENSG00000101665	SMAD7	0
ENSG00000101745	ANKRD12	3
ENSG00000101751	POLI	0
ENSG00000101752	MIB1	1
ENSG00000101773	RBBP8	0
ENSG00000101782	RIOK3	0
ENSG00000101811	CSTF2	2
ENSG00000101843	PSMD10	58
ENSG00000101844	ATG4A	6
ENSG00000101856	PGRMC1	16
ENSG00000101868	POLA1	7
ENSG00000101882	NKAP	0
ENSG00000101888	NXT2	0
ENSG00000101898	RP3-324O17.4	0
ENSG00000101901	ALG13	0
ENSG00000101911	PRPS2	13
ENSG00000101928	MOSPD1	0
ENSG00000101935	AMMECR1	3
ENSG00000101940	WDR13	0
ENSG00000101945	SUV39H1	0
ENSG00000101966	XIAP	74
ENSG00000101972	STAG2	3
ENSG00000101974	ATP11C	3
ENSG00000101986	ABCD1	0
ENSG00000102003	SYP	0
ENSG00000102007	PLP2	50
ENSG00000102010	BMX	54
ENSG00000102030	NAA10	0
ENSG00000102034	ELF4	0
ENSG00000102054	RBBP7	0
ENSG00000102078	SLC25A14	0
ENSG00000102081	FMR1	23
ENSG00000102096	PIM2	0
ENSG00000102100	SLC35A2	1
ENSG00000102103	PQBP1	0
ENSG00000102119	EMD	0
ENSG00000102125	TAZ	0
ENSG00000102144	PGK1	58
ENSG00000102158	MAGT1	12
ENSG00000102172	SMS	1
ENSG00000102178	UBL4A	9
ENSG00000102181	CD99L2	0
ENSG00000102189	EEA1	0
ENSG00000102218	RP2	67
ENSG00000102221	PHF16	3
ENSG00000102225	CDK16	0
ENSG00000102226	USP11	5
ENSG00000102241	HTATSF1	17
ENSG00000102265	TIMP1	0
ENSG00000102302	FGD1	0
ENSG00000102309	PIN4	11
ENSG00000102312	PORCN	0
ENSG00000102316	MAGED2	5
ENSG00000102317	RBM3	17
ENSG00000102390	CXorf26	2
ENSG00000102393	GLA	54
ENSG00000102401	ARMCX3	30
ENSG00000102409	BEX4	0
ENSG00000102471	NDFIP2	13
ENSG00000102524	TNFSF13B	15
ENSG00000102531	FNDC3A	0
ENSG00000102543	CDADC1	1
ENSG00000102547	CAB39L	13
ENSG00000102554	KLF5	0
ENSG00000102572	STK24	4
ENSG00000102580	DNAJC3	30
ENSG00000102606	ARHGEF7	4
ENSG00000102699	PARP4	0
ENSG00000102710	FAM48A	41
ENSG00000102738	MRPS31	0
ENSG00000102743	SLC25A15	24
ENSG00000102753	KPNA3	48
ENSG00000102763	KIAA0564	0
ENSG00000102781	KATNAL1	1
ENSG00000102786	INTS6	1
ENSG00000102796	DHRS12	0
ENSG00000102804	TSC22D1	3
ENSG00000102805	CLN5	0
ENSG00000102871	TRADD	0
ENSG00000102882	MAPK3	19
ENSG00000102886	GDPD3	1
ENSG00000102893	PHKB	10
ENSG00000102897	LYRM1	0
ENSG00000102898	NUTF2	2
ENSG00000102900	NUP93	2
ENSG00000102901	CENPT	21
ENSG00000102904	TSNAXIP1	0
ENSG00000102908	NFAT5	72
ENSG00000102910	LONP2	6
ENSG00000102921	N4BP1	11
ENSG00000102931	ARL2BP	0
ENSG00000102967	DHODH	2
ENSG00000102974	CTCF	1
ENSG00000102977	ACD	0
ENSG00000102978	POLR2C	0
ENSG00000102984	ZNF821	2
ENSG00000103005	C16orf57	14
ENSG00000103018	CYB5B	16
ENSG00000103024	NME3	21
ENSG00000103034	NDRG4	0
ENSG00000103035	PSMD7	16
ENSG00000103037	SETD6	0
ENSG00000103043	VAC14	1
ENSG00000103044	HAS3	33
ENSG00000103047	TMCO7	18
ENSG00000103051	COG4	0
ENSG00000103061	SLC7A6OS	0
ENSG00000103064	SLC7A6	0
ENSG00000103066	PLA2G15	24
ENSG00000103091	WDR59	1
ENSG00000103111	MON1B	12
ENSG00000103121	CMC2	0
ENSG00000103126	AXIN1	0
ENSG00000103145	HCFC1R1	60
ENSG00000103148	NPRL3	18
ENSG00000103150	MLYCD	1
ENSG00000103152	MPG	0
ENSG00000103160	HSDL1	0
ENSG00000103168	TAF1C	0
ENSG00000103174	NAGPA	0
ENSG00000103187	COTL1	0
ENSG00000103194	USP10	0
ENSG00000103197	TSC2	0
ENSG00000103199	ZNF500	0
ENSG00000103222	ABCC1	0
ENSG00000103245	NARFL	0
ENSG00000103249	CLCN7	0
ENSG00000103253	HAGHL	0
ENSG00000103254	FAM173A	0
ENSG00000103257	SLC7A5	0
ENSG00000103260	METRN	0
ENSG00000103264	FBXO31	0
ENSG00000103266	STUB1	2
ENSG00000103274	NUBP1	32
ENSG00000103275	UBE2I	0
ENSG00000103316	CRYM	0
ENSG00000103319	EEF2K	0
ENSG00000103326	SOLH	2
ENSG00000103335	PIEZO1	0
ENSG00000103342	GSPT1	17
ENSG00000103343	ZNF174	0
ENSG00000103351	CLUAP1	0
ENSG00000103353	UBFD1	0
ENSG00000103356	EARS2	13
ENSG00000103363	TCEB2	8
ENSG00000103381	CPPED1	0
ENSG00000103404	USP31	5
ENSG00000103415	HMOX2	28
ENSG00000103423	DNAJA3	41
ENSG00000103426	CORO7	0
ENSG00000103429	BFAR	18
ENSG00000103472	RRN3P2	0
ENSG00000103479	RBL2	5
ENSG00000103489	XYLT1	0
ENSG00000103490	PYCARD	0
ENSG00000103494	RPGRIP1L	0
ENSG00000103495	MAZ	2
ENSG00000103496	STX4	0
ENSG00000103502	CDIPT	50
ENSG00000103507	BCKDK	56
ENSG00000103510	KAT8	4
ENSG00000103512	NOMO1	1
ENSG00000103540	CCP110	0
ENSG00000103544	C16orf62	0
ENSG00000103549	RNF40	0
ENSG00000103550	C16orf88	2
ENSG00000103591	AAGAB	72
ENSG00000103599	IQCH	44
ENSG00000103642	LACTB	51
ENSG00000103657	HERC1	73
ENSG00000103671	TRIP4	0
ENSG00000103707	MTFMT	0
ENSG00000103769	RAB11A	56
ENSG00000103852	TTC23	0
ENSG00000103855	CD276	1
ENSG00000103876	FAH	38
ENSG00000103888	KIAA1199	14
ENSG00000103942	HOMER2	20
ENSG00000103966	EHD4	86
ENSG00000103978	TMEM87A	0
ENSG00000103995	CEP152	1
ENSG00000104047	DTWD1	12
ENSG00000104059	FAM189A1	0
ENSG00000104064	GABPB1	0
ENSG00000104093	DMXL2	39
ENSG00000104129	DNAJC17	0
ENSG00000104131	EIF3J	25
ENSG00000104133	SPG11	10
ENSG00000104142	VPS18	87
ENSG00000104147	OIP5	1
ENSG00000104154	SLC30A4	39
ENSG00000104164	PLDN	6
ENSG00000104177	MYEF2	0
ENSG00000104205	SGK3	12
ENSG00000104218	CSPP1	1
ENSG00000104221	BRF2	0
ENSG00000104228	TRIM35	0
ENSG00000104231	ZFAND1	30
ENSG00000104299	INTS9	0
ENSG00000104324	CPQ	36
ENSG00000104325	DECR1	79
ENSG00000104331	IMPAD1	0
ENSG00000104341	LAPTM4B	0
ENSG00000104343	UBE2W	3
ENSG00000104356	POP1	2
ENSG00000104365	IKBKB	1
ENSG00000104368	PLAT	0
ENSG00000104375	STK3	4
ENSG00000104381	GDAP1	0
ENSG00000104408	EIF3E	6
ENSG00000104412	EMC2	12
ENSG00000104419	NDRG1	59
ENSG00000104427	ZC2HC1A	2
ENSG00000104432	IL7	0
ENSG00000104447	TRPS1	4
ENSG00000104450	SPAG1	0
ENSG00000104472	CHRAC1	3
ENSG00000104497	SNX16	0
ENSG00000104518	GSDMD	1
ENSG00000104522	TSTA3	2
ENSG00000104524	PYCRL	2
ENSG00000104529	EEF1D	0
ENSG00000104549	SQLE	29
ENSG00000104613	INTS10	0
ENSG00000104626	ERI1	1
ENSG00000104635	SLC39A14	12
ENSG00000104643	MTMR9	0
ENSG00000104660	LEPROTL1	19
ENSG00000104671	DCTN6	35
ENSG00000104687	GSR	38
ENSG00000104689	TNFRSF10A	1
ENSG00000104691	UBXN8	22
ENSG00000104695	PPP2CB	0
ENSG00000104714	ERICH1	0
ENSG00000104731	KLHDC4	0
ENSG00000104738	MCM4	16
ENSG00000104756	KCTD9	26
ENSG00000104763	ASAH1	0
ENSG00000104765	BNIP3L	1
ENSG00000104774	MAN2B1	0
ENSG00000104805	NUCB1	0
ENSG00000104812	GYS1	28
ENSG00000104823	ECH1	11
ENSG00000104824	HNRNPL	27
ENSG00000104825	NFKBIB	37
ENSG00000104835	FBXO17	2
ENSG00000104852	SNRNP70	0
ENSG00000104853	CLPTM1	0
ENSG00000104856	RELB	0
ENSG00000104859	CLASRP	0
ENSG00000104863	LIN7B	0
ENSG00000104866	PPP1R37	3
ENSG00000104870	FCGRT	0
ENSG00000104872	PIH1D1	11
ENSG00000104880	ARHGEF18	4
ENSG00000104883	PEX11G	5
ENSG00000104884	ERCC2	0
ENSG00000104885	DOT1L	70
ENSG00000104886	PLEKHJ1	9
ENSG00000104889	RNASEH2A	0
ENSG00000104894	CD37	0
ENSG00000104897	SF3A2	0
ENSG00000104903	LYL1	0
ENSG00000104904	OAZ1	11
ENSG00000104907	TRMT1	2
ENSG00000104915	STX10	0
ENSG00000104936	DMPK	0
ENSG00000104946	TBC1D17	0
ENSG00000104951	IL4I1	15
ENSG00000104957	CCDC130	0
ENSG00000104964	AES	74
ENSG00000104969	SGTA	28
ENSG00000104973	MED25	0
ENSG00000104976	SNAPC2	11
ENSG00000104979	C19orf53	8
ENSG00000104980	TIMM44	14
ENSG00000104983	CCDC61	0
ENSG00000104998	IL27RA	0
ENSG00000105053	VRK3	7
ENSG00000105058	FAM32A	48
ENSG00000105063	PPP6R1	0
ENSG00000105072	C19orf44	2
ENSG00000105085	MED26	3
ENSG00000105088	OLFM2	0
ENSG00000105127	AKAP8	0
ENSG00000105135	ILVBL	0
ENSG00000105136	ZNF419	14
ENSG00000105171	POP4	2
ENSG00000105173	CCNE1	24
ENSG00000105176	URI1	18
ENSG00000105185	PDCD5	2
ENSG00000105186	ANKRD27	0
ENSG00000105193	RPS16	11
ENSG00000105197	TIMM50	2
ENSG00000105204	DYRK1B	0
ENSG00000105220	GPI	52
ENSG00000105221	AKT2	0
ENSG00000105223	PLD3	2
ENSG00000105229	PIAS4	0
ENSG00000105245	NUMBL	1
ENSG00000105248	CCDC94	1
ENSG00000105254	TBCB	74
ENSG00000105255	FSD1	0
ENSG00000105258	POLR2I	63
ENSG00000105270	CLIP3	0
ENSG00000105281	SLC1A5	14
ENSG00000105287	PRKD2	0
ENSG00000105298	CACTIN	0
ENSG00000105321	CCDC9	0
ENSG00000105323	HNRNPUL1	5
ENSG00000105325	FZR1	2
ENSG00000105327	BBC3	46
ENSG00000105329	TGFB1	1
ENSG00000105339	DENND3	0
ENSG00000105341	ATP5SL	0
ENSG00000105355	PLIN3	0
ENSG00000105364	MRPL4	2
ENSG00000105372	RPS19	11
ENSG00000105373	GLTSCR2	0
ENSG00000105379	ETFB	50
ENSG00000105393	BABAM1	11
ENSG00000105397	TYK2	0
ENSG00000105401	CDC37	0
ENSG00000105402	NAPA	15
ENSG00000105404	RABAC1	62
ENSG00000105426	PTPRS	32
ENSG00000105429	MEGF8	0
ENSG00000105438	KDELR1	0
ENSG00000105443	CYTH2	0
ENSG00000105447	GRWD1	2
ENSG00000105483	CARD8	5
ENSG00000105486	LIG1	1
ENSG00000105497	ZNF175	65
ENSG00000105499	PLA2G4C	0
ENSG00000105514	RAB3D	82
ENSG00000105516	DBP	1
ENSG00000105518	TMEM205	82
ENSG00000105519	CAPS	0
ENSG00000105520	AC024575.1	0
ENSG00000105552	BCAT2	2
ENSG00000105556	MIER2	0
ENSG00000105568	PPP2R1A	45
ENSG00000105576	TNPO2	2
ENSG00000105583	WDR83OS	8
ENSG00000105607	GCDH	0
ENSG00000105612	DNASE2	0
ENSG00000105617	LENG1	1
ENSG00000105618	PRPF31	0
ENSG00000105619	TFPT	0
ENSG00000105640	RPL18A	11
ENSG00000105643	ARRDC2	0
ENSG00000105647	PIK3R2	0
ENSG00000105655	ISYNA1	0
ENSG00000105656	ELL	3
ENSG00000105662	CRTC1	0
ENSG00000105663	MLL4	4
ENSG00000105669	COPE	68
ENSG00000105671	DDX49	68
ENSG00000105676	ARMC6	2
ENSG00000105677	TMEM147	32
ENSG00000105679	GAPDHS	0
ENSG00000105698	USF2	0
ENSG00000105699	LSR	13
ENSG00000105700	KXD1	47
ENSG00000105701	FKBP8	74
ENSG00000105705	SUGP1	0
ENSG00000105708	ZNF14	0
ENSG00000105722	ERF	0
ENSG00000105732	ZNF574	0
ENSG00000105738	SIPA1L3	4
ENSG00000105750	ZNF85	0
ENSG00000105755	ETHE1	0
ENSG00000105771	SMG9	39
ENSG00000105778	AVL9	0
ENSG00000105793	GTPBP10	0
ENSG00000105810	CDK6	18
ENSG00000105819	PMPCB	4
ENSG00000105821	DNAJC2	22
ENSG00000105829	BET1	12
ENSG00000105835	NAMPT	28
ENSG00000105849	TWISTNB	2
ENSG00000105854	PON2	0
ENSG00000105855	ITGB8	36
ENSG00000105856	HBP1	5
ENSG00000105865	DUS4L	0
ENSG00000105866	SP4	3
ENSG00000105875	WDR91	0
ENSG00000105877	DNAH11	32
ENSG00000105879	CBLL1	0
ENSG00000105887	MTPN	14
ENSG00000105889	STEAP1B	7
ENSG00000105926	MPP6	18
ENSG00000105928	DFNA5	0
ENSG00000105939	ZC3HAV1	86
ENSG00000105948	TTC26	0
ENSG00000105953	OGDH	3
ENSG00000105963	ADAP1	0
ENSG00000105968	H2AFV	19
ENSG00000105974	CAV1	0
ENSG00000105983	LMBR1	1
ENSG00000105993	DNAJB6	1
ENSG00000106003	LFNG	14
ENSG00000106009	BRAT1	1
ENSG00000106012	IQCE	1
ENSG00000106028	SSBP1	2
ENSG00000106049	HIBADH	4
ENSG00000106052	TAX1BP1	5
ENSG00000106077	ABHD11	0
ENSG00000106080	FKBP14	0
ENSG00000106086	PLEKHA8	1
ENSG00000106100	NOD1	0
ENSG00000106105	GARS	14
ENSG00000106125	FAM188B	1
ENSG00000106133	NSUN5P2	4
ENSG00000106153	CHCHD2	21
ENSG00000106211	HSPB1	22
ENSG00000106245	BUD31	53
ENSG00000106246	PTCD1	85
ENSG00000106258	CYP3A5	0
ENSG00000106261	ZKSCAN1	0
ENSG00000106263	EIF3B	17
ENSG00000106268	NUDT1	8
ENSG00000106290	TAF6	0
ENSG00000106299	WASL	0
ENSG00000106305	AIMP2	2
ENSG00000106328	FSCN3	35
ENSG00000106330	MOSPD3	0
ENSG00000106336	FBXO24	0
ENSG00000106344	RBM28	17
ENSG00000106346	USP42	0
ENSG00000106348	IMPDH1	75
ENSG00000106351	AGFG2	0
ENSG00000106355	LSM5	8
ENSG00000106367	AP1S1	51
ENSG00000106392	C1GALT1	0
ENSG00000106397	PLOD3	75
ENSG00000106399	RPA3	8
ENSG00000106400	ZNHIT1	0
ENSG00000106404	CLDN15	20
ENSG00000106443	PHF14	4
ENSG00000106459	NRF1	3
ENSG00000106460	TMEM106B	49
ENSG00000106477	CEP41	0
ENSG00000106479	ZNF862	29
ENSG00000106546	AHR	0
ENSG00000106554	CHCHD3	7
ENSG00000106588	PSMA2	13
ENSG00000106603	C7orf44	73
ENSG00000106605	BLVRA	13
ENSG00000106608	URGCP	0
ENSG00000106615	RHEB	38
ENSG00000106617	PRKAG2	65
ENSG00000106624	AEBP1	0
ENSG00000106628	POLD2	2
ENSG00000106635	BCL7B	0
ENSG00000106636	YKT6	3
[truncated: 12,528 more rows]
