# Supplementary material for: High-throughput allele-specific expression across 250 environmental conditions
Source: Genome Res. 2016 Dec;26(12):1627–38. doi: 10.1101/gr.209759.116 (PMC5131815; doi:10.1101/gr.209759.116)
Supplement: Supplemental Material [file supp_gr.209759.116_Supplemental_Table_S8.xlsx]

## Sheet: SupplementNetworkTable
						LCL													SMC																	Mel
Module	Number of Genes	Assigned Treatment	Heterozygous SNPs	ASE SNPs	% ASE	Dexamethasone	Caffeine	Selenium	Vitamin A	Acrylamide	BPA	PFOA	Aspirin	Cadmium	Loratadine	Cetirizine	Phthalate	Copper	Dexamethasone	Caffeine	Molybdenum	Selenium	Vitamin D	Vitamin B5	Vitamin B6	Vitamin A	Aldosterone	Acrylamide	BP-3	BPA	PFOA	Triclosan	Insulin	Acetaminophen	Aspirin	Dexamethasone	Caffeine	Selenium	Vitamin D	Vitamin A	Triclosan	Insulin	Acetaminophen	Aspirin	Loratadine	Phthalate	Tunicamycin	Vitamin E	BHA
M0	6591	Cadmium	349390	2620	0.00749878	2.66508	2.17512	-10.9229	-6.22051	-1.58016	-1.95761	-1.8229	-8.05808	-5.45818	-2.71355	-4.63979	-2.22331	-1.60565	-1.68216	4.29128	-3.77631	0.126424	-2.06575	-5.42663	-6.44478	-3.84333	-1.27321	6.36226	3.65357	1.40659	3.09708	0.463733	-3.09588	2.50762	1.16253	1.24438	-0.619398	-0.352371	2.42935	0.684839	2.34202	-1.57542	3.45168	2.10592	6.4196	3.16353	3.67691	1.78044	7.10464
M1	1456	Iron	79828	271	0.0033948	1.22701	5.679	2.19437	-0.0372918	0.232418	0.280028	1.57792	2.39721	3.32424	1.48272	5.5967	2.98213	3.63661	1.01218	10.943	-0.577854	3.19143	1.20766	2.50034	1.84611	3.57416	1.08567	-4.00832	-5.31081	-3.23394	-5.08256	-6.58059	-4.27672	-3.47545	-2.12397	-0.80833	1.26691	1.9363	-0.367276	2.6565	0.0285393	-0.978323	-1.20158	-2.30338	0.661264	-3.46907	0.0555548	-1.23511	-1.17408
M2	665	Iron	54038	329	0.00608831	-2.3275	-8.88877	1.30905	-2.71075	-0.615444	0.31234	-0.61956	-0.912598	-0.605524	-1.39806	-1.99669	-1.72264	-2.37236	1.98652	-25.444	0.281368	-0.941768	0.124	-1.00631	-0.844012	-0.690018	5.46602	1.80966	2.31822	3.52393	2.11858	2.06198	4.30335	3.88544	1.81693	-1.0024	-2.85252	-2.50936	-1.1048	-4.75812	-3.34522	4.33982	1.52121	1.49294	-10.3982	2.40465	-8.4629	-0.369999	1.27915
M3	594	Cetirizine	49448	171	0.00345818	-0.734391	2.40223	3.72328	1.54969	0.859125	1.04133	1.74083	3.41729	5.73003	2.03114	4.77683	2.62983	2.58201	0.437716	5.48956	2.47281	1.30952	0.658761	4.6763	5.33221	5.56227	0.575795	-6.47313	-4.77058	-2.70676	-3.52124	-5.13407	0.0610441	-4.38919	-1.56816	-1.30482	1.49254	1.6026	-2.2219	0.985596	-0.970253	0.520012	-3.06542	-2.3095	-3.7067	-3.4499	-0.134103	-1.96029	-6.22128
M4	350	Ibuprofen	25158	36	0.00143096	-0.269435	2.69642	0.874898	0.726896	0.923076	1.10511	2.08807	2.91184	5.12777	2.0294	3.67978	2.53246	0.825048	1.66103	5.91167	3.14296	0.435923	1.72364	6.83149	6.27566	4.62718	0.960951	-6.39198	-3.70783	-2.32984	-3.19137	-3.70337	0.0849004	-3.71274	-1.66302	-1.17895	1.41838	0.270154	-2.81736	0.400072	-0.995613	0.850316	-2.77597	-1.73993	-3.91975	-3.05237	-0.721238	-2.26217	-6.84247
M5	312	Tunicamycin	21371	101	0.00472603	4.71517	8.88196	-4.78834	0.630493	-1.23671	-2.98024	-2.00432	-1.0704	-2.81717	-2.16708	-1.6022	-0.309921	1.33109	-2.56038	31.6437	-2.58501	2.97639	-1.26067	-12.5973	-6.50892	-2.20508	-3.53482	0.946317	1.15173	-0.1256	1.4583	-0.533381	-5.17685	0.434307	0.746525	1.32556	1.23144	1.58172	3.04366	2.09059	1.94677	-4.06426	2.53604	1.26207	8.99258	2.07323	10.7333	2.01566	4.06989
M6	233	Iron	23506	188	0.00799796	1.93818	2.94663	-7.94579	0.811099	-1.06908	-2.96402	-2.17556	-3.42579	-2.1393	-2.71529	-2.45398	-0.774119	1.09239	-1.29611	-1.30606	-3.87607	-1.43961	-2.59229	-2.40693	-10.7445	-1.61582	-1.7541	3.2792	3.4151	1.10491	3.87774	1.26449	-1.80144	0.310486	1.47409	1.09363	-0.976724	3.29555	2.80195	2.01258	3.00345	-0.840378	3.46591	1.85355	6.97834	2.54885	2.61859	2.7007	5.94324
M7	204	Cetirizine	2516	50	0.0198728	5.98612	6.4559	4.07923	0.953784	5.53319	12.6579	-2.87711	6.48009	-10.6472	8.08364	-11.4476	-7.74056	-4.62379	-1.30147	-2.3677	-1.16077	-1.75626	2.47317	-0.46545	-1.30332	-2.11614	-0.246862	1.02494	4.94249	0.865897	3.89071	1.15377	2.32711	2.53327	1.40868	0.459276	-2.43724	14.3614	0.591636	-0.797798	1.42748	0.368559	6.17217	3.39256	-3.06275	10.9695	-2.48279	11.9931	0.398914
M8	186	Tunicamycin	9372	111	0.0118438	0.987839	-5.16992	1.90946	-2.80428	-0.826981	0.814823	-0.805074	0.049588	-1.49622	-0.533745	-0.945697	-1.15263	-4.95971	-0.694138	-4.89557	-0.0225534	1.89899	3.51334	1.30015	2.57138	-0.73243	1.29047	-3.48828	-1.40991	-1.79668	-1.00966	-2.74638	-0.698279	0.664038	-1.15681	0.078389	-1.93115	-5.7825	-2.3122	-3.38005	-1.0536	1.75418	-0.257227	0.0467522	-4.82681	1.99309	-12.2545	-2.69946	0.637988
M9	171	Tunicamycin	11410	98	0.00858896	2.15119	-3.35607	-2.35604	-5.72362	-0.255982	-0.416045	-1.45534	-2.76799	-2.8777	-2.05302	-6.08178	-3.29514	-5.45444	4.48146	-7.91743	-0.755665	-2.0172	0.285342	-2.8954	-2.00326	-3.24036	1.81876	4.96074	3.12955	1.88829	1.476	1.37087	3.9222	7.84245	3.71342	0.972812	-1.94595	-2.00757	-0.931062	-2.45843	-1.94136	0.426048	2.07847	2.33839	-4.5858	4.06726	-12.8627	1.54423	0.982591
M10	166	Iron	16914	45	0.00266052	1.12747	5.55601	0.276212	-0.694982	0.82527	0.978541	1.9199	2.30535	3.73063	1.84464	3.21897	2.4098	0.443334	1.50193	9.18893	1.03902	0.543686	1.01743	4.90844	4.65729	7.07274	0.739406	-7.51638	-4.03332	-3.34702	-3.99527	-4.44782	-1.44996	-4.67937	-2.10168	-0.995503	1.77156	0.524737	-3.06592	0.654697	0.0794234	-0.245407	-2.56726	-1.93483	0.00433925	-2.95003	-0.100184	-2.22618	-5.55871
M11	162	Zinc	5797	217	0.0374332	2.1717	0.706766	3.55647	-2.15652	-0.408055	4.23678	-0.35486	1.20163	-1.0209	0.239918	-0.104118	-0.688808	-2.22145	0.0730123	4.35354	-2.51331	1.56919	3.30841	1.59466	2.87287	-0.23995	0.160497	-3.89583	-1.92516	-2.60523	-0.679933	-1.49599	0.222483	-0.0273882	-1.83309	0.155402	-0.529264	-3.76784	-2.45067	-2.588	0.226035	0.784025	-0.907669	-0.55723	-1.92996	0.483522	-3.43786	-2.44563	-0.357039
M12	149	Tunicamycin	18507	141	0.00761874	-2.0741	-9.66162	-3.27509	3.19384	-1.5525	-1.62214	-2.4886	-2.89178	-3.8635	-2.22223	-4.30301	-3.09688	-2.00654	-6.59901	-3.73867	-5.24076	-2.24193	-3.12132	-4.63098	-5.65584	-4.15605	-4.4656	8.17853	6.98353	1.57087	3.95381	7.897	1.44646	1.36362	2.4019	0.232512	-2.42744	-1.31706	2.25873	-2.00431	1.71535	5.35117	2.70305	1.99467	9.40587	2.49655	45.9653	1.97542	7.47757
M13	144	Iron	10722	93	0.00867375	4.20497	10.5779	1.07617	-1.2033	0.379627	-0.0093305	0.847595	1.25164	0.304906	1.65092	2.00248	1.50718	1.58569	-0.937608	28.1033	0.303781	1.11755	0.144455	2.42704	3.6538	2.43918	-1.18365	-2.22601	-3.31057	-4.68148	-2.62839	-3.53824	-2.53043	-3.72456	-1.96196	-0.11233	2.59108	0.772034	-1.28989	0.794833	0.651331	-24.7868	-4.43863	-3.54269	3.90416	-2.27364	1.81317	-2.06394	-10.3385
M14	126	Tunicamycin	11878	226	0.0190268	-0.636851	4.70942	3.59703	1.99938	-1.29002	-0.839432	-1.06162	-3.18338	-2.61566	-1.70321	-4.58347	-2.30938	-0.0878074	-3.67359	3.68491	-4.71054	1.9944	-0.907534	-2.28574	-1.36107	-1.89185	-2.05816	1.51862	1.13784	1.09915	1.57674	3.7245	1.0585	0.280039	0.918381	2.03858	0.364258	-2.38782	1.83104	-0.724425	-0.170552	4.63184	3.28474	2.03936	1.48843	2.34936	91.314	0.681049	5.55447
M15	125	Iron	14276	128	0.0089661	-7.08551	-1.49313	-7.0387	-4.11585	0.566436	-3.1602	-4.54272	-4.03645	-4.81201	-3.58057	-4.63842	-2.74218	-3.44302	1.15222	-2.8337	-1.36773	0.221483	1.06078	-2.4332	-3.63505	-1.47865	-1.04591	2.43954	1.68143	6.42045	1.50908	0.126736	0.0759624	2.69882	10.8737	-1.10056	-3.14727	-1.54672	-2.57643	-1.48318	-1.94165	-1.89984	-0.723407	0.343431	0.226929	0.0012897	-0.870755	0.746259	0.914964
M16	107	Tunicamycin	9362	5	0.000534074	-0.648181	-10.374	-1.56205	-3.53382	-0.987012	-0.772532	-1.19039	-1.71593	-1.33559	-1.97893	-3.06857	-2.21435	-2.76543	-0.0426017	-25.3872	-0.84633	0.351535	-0.315901	-2.73193	-2.73275	-3.72851	1.59453	2.65734	2.85015	2.02695	1.4897	1.24343	2.03978	3.09444	2.31074	0.716338	-3.60754	0.097108	1.52659	-2.35509	-14.2979	14.4787	6.79372	5.47059	-23.8238	3.57537	-9.38111	2.14082	12.1352
M17	106	Iron	10751	26	0.00241838	-2.39081	-9.7593	-2.73137	-1.01064	-1.15133	-0.517318	-0.920231	-1.3901	-0.47629	-2.1907	-2.6428	-1.89072	-2.21489	-0.478184	-13.2283	-0.66274	-0.241905	-0.327829	-1.83033	-2.70399	-0.747522	0.678686	3.78194	5.80557	3.15375	2.63922	3.29956	2.55575	1.69001	1.64979	0.601122	-2.68344	-1.21289	1.62297	-1.35043	3.1896	13.0706	7.09508	3.87605	5.05501	3.70207	0.163836	1.50147	12.4521
M18	92	Cetirizine	9678	21	0.00216987	-0.995203	1.69999	1.826	1.19998	0.77	1.02825	1.92156	2.91617	6.03694	2.00658	4.45014	2.62341	0.717706	2.1329	5.19695	4.17724	1.36261	1.66522	7.73451	6.3397	6.15847	2.42311	-5.93564	-3.61059	-2.21216	-3.31481	-2.43588	0.553735	-3.36922	-1.88796	-1.48329	1.15852	0.0701496	-2.589	0.224119	-1.10817	0.997291	-3.16379	-2.32403	-4.64023	-3.48988	-2.04067	-2.30029	-6.18603
M19	92	Nicotine	6774	69	0.010186	6.43471	5.74	-8.79984	-5.08661	-2.48911	-3.42754	-3.11923	-4.34745	-6.22008	-3.97027	-3.58797	-2.00666	-2.73619	1.03475	3.38859	-3.72291	-1.32137	1.51345	-2.61759	-2.94889	-1.71308	-0.171996	1.03559	1.09442	-2.27037	-1.34833	-0.951684	-4.81078	-1.71293	0.0766635	0.767516	-0.724386	0.377278	1.44764	0.125473	1.02616	-3.14656	3.07587	1.65774	-2.1663	3.06457	-0.256821	1.92082	6.14674
M20	91	Cetirizine	566	0	0	-0.573234	9.65703	4.2305	2.2857	0.732662	1.22279	1.54463	4.15179	6.35912	1.3721	6.36127	2.73413	1.5719	2.82408	12.8376	0.910419	3.6656	1.19656	2.82008	6.02357	3.54218	0.944707	-5.10317	-3.14095	-2.61118	-2.3916	-2.87042	-2.41217	-3.56432	-0.584127	-1.18172	1.67247	0.713061	-1.58966	0.999289	-3.18277	-2.78882	-1.17799	-0.720334	-4.56401	-2.9811	2.76209	-1.82001	-4.80965
M21	90	Iron	5019	5	0.000996214	4.68322	-1.72671	2.51754	-3.71429	3.03821	2.84212	1.37262	-0.400849	-0.316808	0.444201	-2.96843	-2.18714	-6.57236	-0.129493	-8.8086	-2.44839	-6.68904	-0.426322	2.76193	1.84431	-0.926542	-1.52567	1.71475	1.28945	-1.89136	1.26177	0.547865	8.17851	3.37591	7.22271	-0.556971	-0.661976	4.6723	-1.62577	-1.16355	-1.84509	0.720468	0.283562	0.735659	-3.27835	1.24724	-6.04821	1.77329	-0.947865
M22	88	Caffeine	5635	60	0.0106477	-2.47402	-7.96745	0.554628	-1.21846	-0.708227	-0.697744	-1.03681	-1.1743	-1.15847	-1.8818	-2.52237	-1.85779	2.30042	-0.84062	-15.3693	-0.40334	3.22747	-1.04242	-2.31022	-3.76384	-1.82366	0.237257	1.88822	3.35424	4.71584	3.71642	3.67421	6.17293	2.55099	9.99874	1.55076	-3.28374	0.662817	3.09826	-0.420103	-2.7155	6.56296	6.87795	3.25644	-1.98846	3.21877	-7.05512	3.02603	7.34332
M23	87	Ibuprofen	12195	95	0.00779008	2.07907	2.77707	-15.0964	-0.376113	-2.35833	-4.07759	-3.19041	-3.58214	-9.50685	-4.86697	-2.08953	-0.867119	0.239267	0.888352	1.52183	-2.76864	-2.21536	-1.09705	-3.55162	-28.6168	-1.23486	-0.701396	2.64165	2.94163	1.79891	3.61761	1.09937	-1.71726	1.7457	1.18714	0.905008	-0.242263	1.48121	2.52955	1.4945	1.70723	-1.20656	2.60144	0.964137	5.63323	1.75754	1.11897	2.27326	4.28162
M24	80	Cetirizine	5832	203	0.034808	3.12591	-6.92485	-2.60444	-7.74925	-0.921102	-0.823788	-0.931304	-2.88918	-2.13352	-1.98255	-5.5935	-4.07561	-7.52735	0.0632439	-12.2969	-1.64663	-0.157057	0.384495	-2.32914	-5.21831	-5.06881	0.65764	0.865714	2.12	1.37619	-0.103745	-1.99515	-1.61202	4.51445	2.30216	0.889098	-2.99825	0.475854	2.1102	0.366144	-0.18288	3.43667	4.42752	3.6469	-6.16148	3.31706	-7.15955	1.65355	10.4599
M25	78	BHA	10095	189	0.0187221	-0.205308	-6.27688	-23.943	-0.165305	-1.9899	-1.91126	-1.9829	-3.13772	-2.28242	-3.00613	-3.2516	-3.23021	-0.958515	0.31172	-11.5741	-1.29747	-1.07443	-0.955686	-1.60968	-5.66547	-1.19292	-0.307607	2.97974	3.20159	1.57547	1.98756	1.15855	-0.153535	0.85498	0.472173	0.604054	-2.20407	1.93995	2.44973	0.581516	3.01797	2.06306	6.4491	3.44987	3.22957	3.97885	1.2335	2.52326	5.92007
M26	73	Iron	4926	56	0.0113683	3.14513	7.7869	0.0494614	1.52213	-0.171478	-0.715972	1.20611	1.0721	0.250741	0.785217	1.35796	0.872348	3.18255	-0.953049	4.58307	-1.5969	0.775687	-0.830668	-0.233591	-1.10505	-2.08916	-6.52036	-1.20668	-0.664578	-1.08854	0.44617	0.677479	-1.2888	-0.916413	-1.07087	2.07921	3.52222	1.60659	1.09695	4.22989	4.17085	-1.22034	0.0105781	-0.220505	9.9882	-1.87046	20.5492	-0.348263	0.3352
M27	63	Tunicamycin	8170	73	0.00893513	-0.423385	-6.55945	-3.15022	0.752051	-1.30596	-0.831849	-1.36551	-1.99175	-2.16493	-2.12992	-3.25633	-2.27581	-3.35749	0.805609	-8.3004	-2.01222	-1.37404	-1.73744	-4.55812	-10.6645	-10.0236	-0.407113	9.80742	5.65126	2.77728	2.5165	5.85	1.68814	3.51369	2.04851	0.761209	-2.68831	-2.2713	2.21216	-1.96666	1.63101	1.05473	3.68938	2.06425	2.44733	2.71096	13.8849	1.34315	7.79983
M28	61	Tunicamycin	4226	84	0.019877	0.462493	5.49146	-5.22525	2.73137	-1.11436	-2.59238	-2.65339	-1.68853	-3.61671	-1.26363	-0.884235	-1.30286	0.692806	-5.82471	12.6833	-0.50377	-1.09336	-2.40598	-5.84165	-3.73541	-2.61046	-6.26418	4.2773	2.04253	4.96977	2.18352	2.63782	-1.14787	1.17099	2.03896	0.226661	1.04437	-6.34397	1.111	0.539432	2.60413	-4.09964	1.19575	-0.0406091	10.1477	0.783532	18.656	-0.601011	1.95565
M29	55	Caffeine	8365	110	0.01315	-3.40629	-10.1958	-2.93927	-0.514257	-1.24481	-1.79318	-2.55229	-3.52934	-4.25786	-2.57905	-3.54319	-2.09778	-1.05782	1.0816	-26.4707	-0.510247	-1.77367	0.296543	-3.88235	-3.69938	-2.44709	3.05569	1.60543	2.36438	1.72971	0.847428	-2.78794	3.061	1.29573	1.11566	1.50284	-5.04461	-1.02872	1.13539	-0.314468	-4.10819	2.14773	1.3139	0.595029	-0.562256	1.69536	-11.7244	0.891374	2.79053
M30	55	Tunicamycin	7176	31	0.00431996	-2.19836	0.0636682	-1.38628	15.0576	-2.3441	-3.09964	-3.9543	-2.16503	-2.58996	-1.61618	-1.53046	-1.16486	2.64789	-12.4629	3.33411	-6.26573	-2.27525	-4.63447	-3.18766	-9.17028	-1.64976	-8.17536	2.72787	2.68692	1.65931	3.41779	3.02591	-0.0513613	-0.242212	0.480952	0.657547	0.481102	3.63761	3.51503	1.37085	5.18136	0.140646	3.8358	1.85753	12.2234	2.66528	33.9478	2.48177	4.91156
M31	54	Cadmium	4223	166	0.0393085	-0.871854	-0.107642	8.44759	2.46726	1.63834	0.932718	0.862675	3.40418	2.32293	2.3919	2.06189	2.47748	4.26305	0.644718	0.528156	1.23684	1.33789	0.553145	1.05571	0.125667	2.21242	0.619752	1.82202	-0.415984	0.861857	-0.317214	0.620756	4.2945	-0.643858	0.834217	-1.20462	0.0922828	2.61401	-1.28251	2.89858	-3.31545	-0.760252	-2.20588	-2.62507	-5.17114	-4.35138	-1.31732	-0.926596	-5.95908
M32	53	Iron	7536	132	0.0175159	1.99108	-1.4251	-3.631	15.414	-0.632282	-2.34197	-2.45241	-2.83282	-2.19218	-2.42365	-2.79199	-0.293966	0.72886	2.00306	-3.5619	0.740784	-2.138	-0.0362999	-1.87764	-3.21584	-0.11574	0.262142	0.774767	0.409431	2.72092	0.454081	0.570835	-0.12239	3.87155	2.55133	-0.574474	-1.72671	-1.77534	1.00626	3.27775	0.0345332	0.973287	1.57523	1.66192	-0.550836	1.66501	-7.62549	1.04353	0.631047
M33	52	Iron	4104	13	0.00316764	1.82782	1.1456	-2.78036	1.95367	-2.1802	-1.41763	-1.82543	-0.229546	-1.67964	-1.27351	-0.883779	-0.802023	0.260403	-8.77979	0.378354	-2.54353	1.79212	-2.25373	-3.69087	-5.48562	-1.67198	-5.78425	-2.0436	-0.191394	-2.06773	-0.886448	-1.88825	-2.99508	-0.295927	-1.72232	1.37525	-1.14702	0.40108	4.14892	3.88745	2.52709	-1.72512	3.14389	1.9899	8.03141	3.40564	0.947785	1.94038	3.72474
M34	52	Iron	2714	18	0.00663228	-0.306694	-4.49375	-0.427071	-3.07684	-1.21688	0.368016	-0.370584	-1.3961	-1.13169	-1.64882	-1.69738	-1.23837	-6.05286	-1.16411	-2.95356	-0.0327278	0.643514	3.48836	0.392031	1.31552	-1.25149	0.925867	-3.41405	-0.7951	-0.158505	-0.99465	-1.94068	-0.121341	1.84549	-0.521287	0.0297599	-1.05725	-14.6092	-2.40908	-4.05119	-0.253607	1.7161	0.12198	0.780277	-2.05848	2.40437	-5.30158	-11.4225	3.94192
M35	51	Cadmium	1118	22	0.019678	0.395252	0.0793465	1.59441	-1.23026	-1.18553	-1.09456	-1.71432	-0.574275	-2.14183	-0.168184	-0.236189	-1.40889	-0.705543	-1.55539	-2.71891	-3.91256	-0.255969	0.498062	0.794419	2.16295	0.173081	0.315744	-2.14906	-1.17708	-1.51445	0.271552	-1.92665	-2.856	-0.643307	-1.65857	-0.114669	-0.979684	1.32168	-1.35279	-3.09734	0.337127	0.894759	-0.910076	-0.228417	-1.93045	3.99237	-2.17784	-0.0874364	3.22066
M36	50	BHA	4442	11	0.00247636	-2.77331	3.56853	1.99336	4.67874	1.01594	0.773288	1.29299	1.19347	2.53504	1.94766	2.76761	2.12005	3.09607	3.14123	9.55851	1.83611	0.166661	0.310114	2.91978	4.33341	3.9625	0.97214	-3.81567	-4.09269	-1.98003	-3.65817	-2.10347	-0.731735	-3.28129	-2.14766	-0.968241	1.85295	-0.640796	-2.73252	0.766758	-0.633424	0.147658	-5.09695	-3.30248	-2.15081	-3.57243	-1.65409	-1.69537	-4.36824
M37	49	BHA	7330	8	0.00109141	2.85011	0.993928	-10.3898	-5.11932	-1.68517	-2.82802	-2.05182	-4.48589	-3.12456	-4.165	-4.5736	-2.03595	-3.46033	-0.512153	-10.1388	-1.88944	-1.15383	-0.528497	-2.9593	-6.43343	-2.77177	-0.716559	4.19163	2.93563	1.25058	2.18444	0.136256	-2.33359	1.82337	1.50643	1.38191	-1.83958	1.28929	2.52978	1.57027	2.97561	0.442829	3.82259	2.17808	6.62838	2.84111	-3.06772	2.19547	6.95765
M38	46	Iron	4252	36	0.0084666	-0.913295	-2.54684	2.46548	-0.971121	-0.312237	1.18283	-0.633118	0.551354	-1.36968	-1.46573	-1.73742	-0.157588	2.76873	-1.62756	-5.47789	2.72735	3.52149	-0.300725	-2.38139	-2.32633	-0.173288	-2.77857	-0.760434	-0.495131	-0.118159	0.152101	-1.2385	-0.251957	3.96335	2.41059	0.265639	-0.560896	15.9225	4.71686	0.897231	4.49871	0.211469	3.79695	2.1028	2.29115	2.37354	8.19787	1.47054	6.87616
M39	46	Iron	3025	105	0.0347107	1.67327	6.81327	-12.5134	3.63454	-2.07516	-4.658	-2.7213	-1.94857	-1.67687	-1.7521	-0.794345	0.053828	0.91039	-1.18762	5.48528	0.788115	-0.931103	-2.37903	-2.38234	-2.86027	-3.04528	-1.13514	1.50038	1.01161	0.542273	2.36663	-1.66142	-1.03762	2.37984	0.637343	1.40816	1.4778	0.740796	3.47706	1.73702	1.14792	-3.11335	1.09966	0.681573	8.77299	0.355375	1.58623	2.19179	0.90215
M40	46	Tunicamycin	5830	58	0.00994854	0.69301	-5.40021	-3.2011	-2.9512	-1.18026	-0.968567	-1.68349	-2.55263	-4.33208	-2.07879	-4.25155	-2.64863	-0.1921	-2.06775	-12.0402	-2.57513	-1.01927	-1.27741	-3.2098	-4.90218	-5.27683	-1.62306	3.84727	5.39758	1.96452	2.2259	1.12119	0.509524	3.78514	1.80447	1.28441	-2.00894	-0.14947	2.88013	-0.480564	0.480453	0.556685	4.3074	2.81857	-1.12457	4.22762	-5.88494	2.08936	9.503
M41	46	Tunicamycin	10886	37	0.00339886	0.7063	-1.97971	-13.1254	1.10457	-2.49991	-2.55725	-2.19562	-5.8412	-3.50682	-3.54915	-4.84433	-3.83652	-0.262819	-6.83885	-4.97336	-3.54536	-2.17874	-3.67784	-2.47492	-5.55976	-2.49004	-2.81808	5.80697	4.1082	1.57994	5.06358	2.67721	0.806518	1.68981	1.01548	1.33589	-1.5163	0.775814	2.89694	0.710595	4.36634	1.571	4.9088	2.41188	7.73429	3.06673	12.2685	2.54035	4.65661
M42	44	Ibuprofen	7479	52	0.0069528	0.432117	-0.310085	-5.24429	-2.64362	-1.10681	-2.08385	-2.00726	-0.215387	-1.88421	-1.86205	-1.879	-5.58234	1.00452	-21.0539	-1.51025	0.889697	1.24419	-3.37002	-2.97956	-2.8138	-2.20185	-1.7208	1.23541	2.24793	1.11661	3.81899	1.53155	-0.414263	0.843798	1.44911	1.18177	-0.449897	-0.135754	4.06711	-0.310693	1.92931	-1.98596	1.06759	1.41005	6.79932	2.90873	-1.56156	1.62009	2.97324
M43	42	Iron	4557	34	0.00746105	1.49531	5.1529	-4.8497	1.41751	-0.387708	-2.8799	-2.44588	-3.49833	-5.295	-2.14218	-1.74513	-0.478162	1.88449	-1.51669	1.16151	-2.74705	-1.52467	-8.07965	-3.53552	-7.78676	-1.43242	-2.05415	4.48792	2.69159	1.62271	5.23195	2.13498	-1.19525	1.86673	2.6596	0.546035	-0.243351	1.54103	2.33591	2.14367	0.505416	-2.08056	2.41303	1.19057	0.903304	1.28756	5.41951	2.07967	5.94665
M44	42	Iron	3757	8	0.00212936	-1.58324	3.60758	-0.850484	8.78657	0.162504	0.2821	1.1165	1.05211	1.31539	1.10686	1.74292	1.46742	1.37633	-0.847906	7.2612	2.37942	2.63461	-0.0681265	5.32322	7.42016	5.08716	1.01429	-10.4623	-3.59314	-4.3276	-4.35084	-3.59455	-0.943389	-3.99753	-3.37803	-0.617585	1.924	1.93678	-2.40139	1.00435	0.845064	2.28049	-2.96279	-1.41208	3.34556	-2.1577	-1.70059	-1.80459	-7.99615
M45	41	Tunicamycin	4067	71	0.0174576	-0.468025	2.08032	2.27391	3.61682	1.52076	-1.56988	-0.376032	0.663497	-0.0509082	1.22942	0.69518	1.44127	3.88452	-0.407151	2.67175	-0.757629	-0.420457	-1.82803	-1.10529	-3.151	0.920275	-0.874395	2.86415	1.79841	1.10322	1.78666	2.00442	0.944075	-0.563467	1.37271	-0.947255	0.0971697	6.30163	2.5283	4.25991	-1.37889	-2.1773	-0.729877	-3.04026	-1.88605	-3.78571	4.79238	2.91415	-3.48488
M46	41	Tunicamycin	3160	2	0.000632911	3.28069	10.6501	0.153007	2.36788	0.192528	-3.05323	-0.723257	0.546452	-0.0069749	0.43597	0.896784	0.715589	2.15744	0.106746	3.88894	-1.33854	3.19015	-0.338106	-0.527039	-0.543791	0.240274	-1.52576	-0.0300729	-0.0205192	-1.16046	1.37885	1.67634	-2.9466	-1.05566	0.282575	-0.261742	-1.28042	0.575424	1.94817	2.27053	-0.470395	-3.35512	1.12313	-0.724735	0.300128	1.10494	17.8336	1.89463	2.18537
M47	41	Tunicamycin	2682	36	0.0134228	-2.58239	0.0302559	7.75112	3.47289	2.14848	2.36406	1.37198	3.82852	1.81213	2.80385	4.22995	3.72097	3.9285	1.55761	0.25373	0.36863	2.14039	-0.806342	1.45519	0.448594	0.636436	0.0744409	1.56261	-0.190483	0.220866	-0.638612	0.615244	4.25094	-1.06708	0.798548	-0.338504	0.988697	1.26248	-1.11436	1.69986	-1.58221	-0.905104	-1.69059	-1.25019	-0.236996	-2.94576	23.3551	-0.618222	-2.85355
M48	41	Iron	3500	6	0.00171429	0.917859	-4.22758	-11.2842	-6.59868	-1.27132	-0.675007	-1.01545	-3.13252	-3.61253	-2.0772	-5.71842	-3.18882	-5.11297	0.965072	-7.74937	-0.960982	0.368646	-0.105991	-1.43854	-1.18029	-1.94713	0.430492	-1.02783	0.654731	0.483219	-0.212392	-1.56053	-0.165036	3.78753	0.446097	0.855778	-2.89671	-2.62379	1.32792	-4.36109	-8.84765	6.01545	3.17794	4.46601	-18.2211	4.87063	-9.11755	1.39685	9.13057
M49	39	Ibuprofen	4726	81	0.0171392	0.658049	-0.223278	-14.277	1.51705	-0.697171	-2.26597	-1.91918	-3.04997	-1.83847	-2.53812	-3.63381	-1.4921	0.11966	-3.58105	-8.7977	-2.04487	-1.00529	-0.775473	-2.0662	-10.8761	-1.79506	-1.68532	9.17669	3.93475	2.25851	3.36706	1.61497	0.110735	0.963644	2.63337	1.30106	-1.59663	3.10207	3.0165	1.23856	2.0164	0.533609	3.10872	1.39079	5.69209	2.27042	-0.667939	2.69091	6.77709
M50	38	Tunicamycin	2283	50	0.021901	2.77366	-2.74963	-1.43237	-6.83677	-0.353489	1.4525	-0.372473	-1.44081	-2.65779	-1.35722	-4.5305	-3.19705	-3.41682	1.35965	-3.15224	0.281816	0.43506	1.83128	-2.13759	0.253644	-2.63805	3.04319	1.06488	1.48722	-0.454323	-0.630732	-1.00514	1.23887	7.07332	2.21945	0.0419802	-1.49458	-4.31098	-2.25626	-2.78759	-1.82591	-0.0307023	0.503219	1.01294	-1.3943	2.48466	-7.0499	-2.58941	0.166945
M51	37	Iron	3888	30	0.00771605	-2.24315	5.36457	-5.59262	12.9771	-0.356388	-1.06801	-0.498655	-0.461024	1.10818	-1.99934	-1.31797	0.630912	-0.312677	-1.59614	0.405618	-3.08285	1.70946	-2.50246	-5.71835	-2.52919	-2.23529	-1.92805	0.743254	0.74301	1.02383	4.58817	0.863257	-1.1097	0.468385	-0.00277632	0.9245	-0.121587	-3.98493	3.18506	6.97251	1.06096	0.530514	2.26998	0.32428	1.47187	1.7198	19.0834	1.31319	3.16464
M52	34	Tunicamycin	2379	6	0.00252207	-1.90561	-4.29112	2.06162	-13.2985	0.933844	1.84995	-0.123464	-0.0686241	0.563034	-0.762258	-1.49815	-0.517481	-2.98963	-0.130613	-11.0761	2.12812	-0.515738	1.6555	2.62257	1.40785	-0.925146	1.80526	1.0801	0.278819	0.361636	-0.775605	-0.992501	3.848	2.03739	3.17595	-1.43269	-1.86205	-0.72825	-2.91031	-2.62393	-2.73685	0.339705	-0.729126	-0.806592	-5.02276	-1.4346	-6.75917	-1.89308	-0.910654
M53	30	Tunicamycin	3036	22	0.00724638	-1.13423	-1.77143	-0.864845	0.864288	-0.749186	-0.328068	-1.14556	-0.605481	-2.37212	-1.44166	-2.27167	-0.976588	1.65884	-3.46362	-9.52941	-0.44428	3.07462	-2.65025	-1.25369	-1.33444	-1.54593	-0.591985	2.95573	3.06596	2.906	3.90928	8.75487	1.0989	1.02984	0.746678	2.16499	0.158658	-0.149125	3.55203	0.110042	-0.0501751	1.26338	3.45236	2.2172	-0.986525	2.92866	21.3465	2.23742	2.59424
M54	29	Iron	2689	59	0.0219412	0.915367	-6.16076	-2.07135	-1.83767	-0.514641	1.31611	0.0688911	0.384941	0.113754	-1.80811	-0.941444	-2.8887	1.46866	1.4146	-1.93062	-1.11769	4.26459	1.50436	-1.029	-1.39049	-1.24818	1.992	-1.11055	0.413267	-1.32866	-0.399569	-0.812391	-1.03162	2.738	0.759935	-0.404828	-1.34888	-1.84923	2.10533	-2.13364	-2.08472	-3.38496	1.21855	0.089821	-7.49485	0.901647	-7.18204	-2.07616	8.88981
M55	29	Aldosterone	1973	7	0.0035479	-0.133913	-1.10976	-0.259332	14.203	1.09972	0.38521	0.44131	1.12922	1.24311	1.23751	0.989531	0.976122	2.3722	32.2156	0.511737	2.95727	2.31091	1.99783	2.47159	0.535181	0.335926	50.3998	4.89488	2.06458	-1.22293	5.24205	11.591	0.334321	-1.78677	-2.90194	8.27698	-1.72373	2.08649	2.36497	5.80875	0.217718	0.768611	1.43109	0.647579	6.91552	-0.303854	-5.76776	4.25283	-1.30805
M56	29	Zinc	1536	63	0.0410156	1.5424	-5.63244	0.783234	-5.51021	-0.514966	3.25219	-0.097967	-0.669568	-1.04306	-1.386	-4.52826	-1.23399	-0.855943	-0.362898	-1.63947	0.110941	2.56182	1.21347	0.574546	1.43838	-1.56581	-1.10645	-0.160755	1.97377	1.79209	0.414161	0.241597	3.53454	2.27757	0.910233	0.485828	-0.549	-6.87442	-2.07717	-2.94863	-2.18706	-1.04991	-1.91517	-1.15656	-3.73458	-0.484625	-5.80829	-3.25225	-1.06603
M57	28	Vitamin	1419	2	0.00140944	1.93561	8.19246	-0.0191298	1.7219	2.02063	-2.80776	-1.07984	1.84877	0.181605	0.857501	0.473516	2.04478	5.59307	1.90738	8.43631	-1.89176	3.2147	-4.15265	-2.15849	-6.19088	-0.903255	-0.560772	4.97563	2.3832	1.42523	3.12032	3.79924	0.0781524	-0.221878	1.57498	0.670306	1.36377	4.45554	2.73492	2.64905	0.844245	-1.81005	0.932709	-1.30782	-0.13923	-0.540277	13.2354	2.75875	1.23983
M58	28	Ibuprofen	1888	0	0	0.573909	-1.63607	-8.84851	-1.31824	-0.951129	-0.734952	-0.942733	-2.43754	-0.656661	-2.58789	-4.58467	-1.93271	-3.20989	-3.1851	-9.45744	-3.56115	-0.00357872	-2.63469	-5.50214	-5.05019	-3.21995	-3.75008	10.3886	10.0447	1.66783	3.21434	1.50922	0.255994	1.74319	1.80606	1.16737	-1.58367	-0.594614	1.78954	-0.0281722	1.93082	0.48167	3.54067	2.66183	1.95346	3.3654	-6.34986	2.09207	11.8109
M59	25	Aldosterone	2060	11	0.00533981	5.99298	7.54903	-0.0490673	1.50534	-0.1847	-0.849794	-0.221562	2.11709	0.404152	0.642083	1.60877	2.98391	2.12238	12.1959	11.9501	-0.586904	0.536562	1.62212	-1.32499	-2.99943	-0.721786	11.5034	0.0406438	-0.715271	-3.48544	0.0545023	0.161452	-3.36098	-4.4667	-2.52442	3.85206	4.28254	-0.347779	0.1173	2.27113	-0.572708	-6.85026	-1.15157	-2.08707	4.43799	-2.00439	8.72635	-0.0671347	0.54422
M60	24	Tunicamycin	705	0	0	2.05672	6.99287	-17.7355	0.34449	1.0148	1.85128	-0.538768	3.80805	-2.49965	2.80847	-0.679262	-2.22744	-0.0779789	0.694419	3.01545	1.47084	-3.16646	2.30536	-0.867302	0.0518709	0.882039	1.75103	-2.4968	-1.81557	-2.08536	0.541174	-1.92682	-0.332699	-1.87178	-1.53517	-0.227017	3.67411	8.06724	-1.74971	-1.54853	3.2051	-3.05334	2.9885	4.6759	-1.9219	4.03732	-9.68644	3.05977	-1.04197
M61	24	BP-3	2404	5	0.00207987	-0.228448	1.24275	-8.45139	-0.0848721	1.46475	-2.01844	-1.1617	-0.477056	-0.469736	-0.727365	-1.18082	-0.145448	0.944031	7.56867	-4.67807	-3.13755	0.0198664	-0.557815	-1.89271	-5.58574	-1.0986	2.19861	2.8493	3.22122	1.49927	1.61842	1.86128	0.612452	0.353632	1.63834	0.728747	-1.69662	6.22544	2.19244	3.30159	-1.57657	-0.568993	3.19478	0.410168	-7.87391	0.589776	0.497039	3.07081	4.95072
M62	24	Tunicamycin	774	0	0	3.18036	0.801973	0.128396	-3.17872	1.07164	6.74309	-0.139188	-0.141718	-2.21515	0.431944	-2.94788	-1.53694	-4.82062	-0.578235	-3.0998	-0.794446	0.0311554	10.872	1.10602	2.36401	-0.992592	-0.427315	-1.13274	-0.147341	-1.73897	-0.523396	-0.40235	1.20314	1.00162	-1.18729	-0.441819	-1.31828	0.614866	-2.17816	-2.62927	-2.30788	0.767087	0.43242	0.955094	-3.91931	2.08351	-8.04507	-0.016363	-0.98528
M63	24	Iron	709	0	0	-0.695596	-2.09823	2.94926	-1.64958	-0.51611	1.2687	-0.303692	0.784397	-0.733147	-0.0172258	1.24204	-0.854913	-3.4134	-0.521432	-2.20517	-1.41589	1.00613	1.39676	0.683827	4.79046	-0.999868	0.288073	-2.16945	-0.755417	-2.34046	-0.412096	-1.08332	1.42256	1.42847	-0.20288	-0.189587	-0.422502	-4.85926	-2.6192	-2.86563	-1.2717	0.342954	-1.25152	-1.08217	-3.84468	-0.369742	-1.12791	-3.99063	-0.0325603
M64	23	Tunicamycin	653	0	0	4.21493	4.59993	-3.73349	-1.14744	0.14192	-0.961015	-0.768518	0.193675	-1.315	-1.70994	-1.07344	0.254445	-3.12043	0.781423	4.04039	-3.07916	-0.153295	-2.40585	-4.59784	-3.24437	-2.61093	-2.34936	1.13076	1.68762	0.869336	3.92677	0.86207	-3.50403	2.06638	1.57216	1.98637	0.423417	0.0515638	2.87404	2.01629	1.70129	-3.15507	3.64148	2.93317	6.01958	3.59793	4.76992	2.56339	5.24999
M65	23	Aldosterone	2651	23	0.00867597	1.62979	-0.0713652	-5.38326	4.13958	-1.2814	0.883836	-2.62582	-0.601617	-1.33897	-2.01345	-0.286139	-1.40122	4.14288	23.9818	0.300924	-0.519658	1.34255	-2.47463	-2.28764	-2.72191	0.10511	8.31252	-0.897377	2.03742	0.573426	2.56469	6.40115	-4.24106	4.63373	0.557848	3.03206	-0.557175	1.47308	4.05706	1.22314	1.74769	-1.04671	3.86488	4.98271	4.21196	2.32935	3.90194	2.76302	4.98888
M66	22	Aldosterone	1785	1	0.000560224	15.9087	2.69254	-2.90274	-6.92852	1.05615	0.437659	0.847514	0.119729	2.13116	0.93384	0.00550699	0.0225346	-1.51041	31.9724	-3.12295	2.40146	-0.53233	1.24338	0.994266	0.364765	-0.903054	18.1536	1.89187	0.262288	-1.30579	1.74155	4.39711	-1.80648	-0.81226	0.400488	8.68308	-4.71307	3.66957	-3.18608	0.548585	0.542803	-0.0923627	0.334893	1.1438	2.43215	2.28926	-7.06927	2.14954	-0.30465
M67	21	Ibuprofen	2158	29	0.0134384	1.18752	-2.23599	-9.17087	3.9058	-1.10086	-1.22036	-1.81736	-2.15177	-5.81124	-1.82804	-3.19892	-2.87573	-0.540159	-1.31303	-8.41146	-2.37858	-0.618746	-0.190567	-2.11612	-3.29926	-2.55929	-0.518308	-0.743795	1.13253	0.849202	0.904912	-0.732654	-2.20977	1.77608	0.191559	1.61401	-1.66974	2.60529	2.31608	-0.868277	2.90438	1.80125	3.45259	3.4566	6.2567	4.02894	-1.67216	2.87188	9.23603
M68	21	Iron	1804	1	0.000554324	0.533082	-1.4373	2.16699	-4.55185	3.4199	3.60371	-0.0901536	-0.718092	0.416209	-0.478091	-3.27778	-2.16789	-7.02553	1.029	-2.09073	0.745646	1.24499	0.133714	1.89874	2.21226	-1.48062	0.591298	1.60635	2.29805	1.04303	1.65814	1.34171	6.77832	4.12937	3.39032	-0.906464	-0.406966	2.66461	-2.43402	-1.23222	-2.05337	0.210288	0.0265679	0.640502	-3.41346	1.02974	5.13719	-0.371583	-1.28158
M69	21	Aldosterone	1935	40	0.0206718	-2.99037	-1.73896	-11.0535	6.34582	-4.18919	0.0892771	-0.102595	-0.989952	-1.39351	-3.54271	-1.34668	-0.455443	-0.104296	-13.7884	2.40139	6.11461	-2.22548	-0.609904	1.33863	-0.469867	-1.11334	-29.5473	-1.1016	0.680839	0.630632	-2.27422	-9.88316	-4.20054	2.48333	0.719222	-0.244841	1.23678	1.56997	-0.749364	-0.687392	8.38496	1.24833	1.51774	0.592555	11.455	1.79184	-6.84535	1.51751	0.823281
M70	20	Tunicamycin	878	2	0.0022779	-0.458835	-3.45347	1.42864	5.53232	-0.864473	0.489214	-0.164318	-0.0071506	1.11291	-0.57623	-1.68295	-1.23385	-1.60699	-7.95281	-7.96959	16.9757	2.49834	1.62609	1.73272	1.13257	-0.354797	-4.63386	-1.64709	-2.19983	-0.653099	-5.09607	-3.67092	-0.659866	1.63967	1.78824	-0.116199	-1.26155	1.4212	1.90979	0.466917	4.20371	4.69953	1.79156	2.52849	8.43812	5.77746	-9.50393	1.08762	-1.07565
M71	20	Nicotine	1286	41	0.0318818	5.01061	3.67536	-1.57872	16.5396	-1.25364	-6.25488	-0.834678	-0.903965	-2.33461	-0.385956	0.124817	-0.0743227	7.14502	4.31575	6.8769	-1.46616	-0.923026	3.47424	-1.15567	-2.04381	0.986159	0.869257	0.392405	-1.33264	-1.14538	-1.09234	-1.59845	-1.44108	-3.46786	0.510157	-0.655275	2.06538	-0.614951	2.08773	5.0354	-0.731042	-3.27015	-1.19733	-1.2496	1.47226	-2.97351	4.73836	-2.8292	-0.311524
M72	19	Vitamin	2496	5	0.00200321	-1.06719	2.81206	-4.91074	19.0332	-0.305917	-0.952951	0.315915	0.651366	0.227283	0.278052	1.62883	1.31883	0.236671	-8.57818	1.95482	1.40339	-2.03693	2.08921	-1.0961	-1.17374	14.7142	-3.17065	-4.93793	-5.86968	-3.661	-7.8432	-6.96524	-1.3988	-3.78056	-2.60196	-1.35102	-0.0875929	0.41091	1.6561	11.5358	0.813611	0.903349	-2.93118	-0.0912269	-4.04143	-1.64596	3.5272	-0.7432	-1.01678
M73	19	BP-3	1983	2	0.00100857	0.358186	1.79298	0.363939	20.7248	-0.238337	0.479681	1.50525	2.00501	2.00459	1.69703	3.35546	1.83151	2.40975	0.335066	3.71265	2.42266	0.266434	1.4775	3.24842	5.20446	6.60489	0.49929	-8.34339	-4.61848	-3.35201	-4.39193	-3.51485	-1.08171	-4.85186	-2.73609	-1.68674	1.67248	2.60617	-1.83114	2.23284	-0.794007	1.07181	-2.89996	-2.50832	-3.99256	-3.94916	-3.6424	-3.00471	-5.13442
M74	18	Tunicamycin	959	34	0.0354536	2.15231	1.6552	-4.44767	-7.51629	-2.39782	-0.524909	-0.577949	-2.23684	-3.03603	-3.30294	-2.56813	-3.42982	-4.84201	-0.228793	0.746451	-1.7825	-0.915112	1.65948	-0.51177	1.23264	-1.96449	-3.15496	0.719442	2.07534	-0.802165	0.983257	-0.728928	-0.848512	3.14258	-0.279987	1.31842	0.0339304	-3.44117	-2.92734	-1.82156	-0.857612	-0.0339197	0.679615	1.40981	-0.342119	3.3138	-6.36235	-3.5919	0.988446
M75	17	Caffeine	1584	69	0.0435606	0.406791	-10.524	-5.50027	0.168791	-0.258553	-1.36548	-1.17875	-1.02134	-1.15175	-1.86106	-1.87845	-1.73678	-1.84626	1.29704	-5.80601	-0.496237	-1.10277	-0.134559	-1.7402	-4.76161	-3.89419	2.32669	4.51607	4.3418	2.79271	0.79633	0.228603	5.69938	2.6872	3.42168	0.398874	-4.52823	2.30241	0.727388	1.18175	-1.43836	-0.132779	3.48696	0.696929	-1.7574	1.51935	-3.48449	2.07436	1.56954
M76	15	Nicotine	1897	1	0.000527148	-1.48197	-0.649703	0.560256	-2.50203	-0.126216	-2.17495	-5.13675	-2.02685	-2.98983	0.221127	-3.29254	-4.32996	-1.31146	3.68452	-1.00308	0.565371	-2.82654	-0.338101	-0.357198	-0.931893	-0.680565	0.58751	2.45492	0.204747	-0.0643175	0.668264	1.61985	2.58122	0.615856	1.13079	-0.184942	-1.42817	0.500737	1.67091	-0.174511	-1.44236	-1.43474	-2.37629	-0.956951	-7.10814	-1.57138	3.69845	1.82256	-1.86048
M77	14	Iron	525	0	0	-3.43238	-0.814406	-1.74138	2.07194	0.685932	-2.28572	-0.238947	1.10231	-0.816868	1.38274	0.941639	0.854059	-0.519103	-7.3346	5.7134	1.50622	-2.87428	-0.110515	-4.04308	-5.52726	1.76921	-6.27456	-0.0881106	0.263675	-0.533846	-0.59707	-2.87824	-3.74851	-0.247109	-0.0135666	-0.0628988	-4.42429	0.618506	5.10459	8.28172	6.5034	0.0375448	0.00847011	1.81883	6.3494	1.15245	-4.98123	2.20095	-1.9014
M78	14	Nicotine	647	0	0	-0.694475	2.22533	0.167697	-6.48323	1.02071	1.05922	2.83138	2.53926	4.13007	2.14571	2.21855	2.551	7.58517	-3.17359	0.9405	1.90305	3.1705	1.06659	3.91522	3.65224	2.02903	-1.13236	-3.36579	-3.8538	-2.04853	-1.59105	-2.90094	-0.709191	-3.60988	-0.121224	-0.135416	1.10066	1.20126	-2.71683	0.0199592	1.67847	2.27816	-2.33894	-0.423568	2.83907	-1.71763	3.84475	-1.76762	-2.60181
M79	13	Iron	792	1	0.00126263	1.0229	-10.4468	7.65401	-2.67356	1.34165	0.787502	0.614759	-1.02925	-0.423244	0.306641	-1.91615	-0.139535	2.50906	-1.98311	-2.28738	1.66923	2.76503	-1.62693	2.79727	1.08433	0.728316	0.334429	-1.13301	-0.853226	0.333316	-0.550934	0.345525	7.23362	0.832853	1.06568	2.1615	-0.878245	0.915698	-1.08138	-3.10221	1.04031	3.71926	-0.0867232	1.50041	1.70444	0.678528	-0.194266	1.13654	0.615998
M80	13	Tunicamycin	1677	0	0	-1.71865	-8.52067	2.42832	-1.10898	-1.47094	-0.613565	-2.04932	-2.01157	-2.07261	-1.78636	-1.76942	-1.88414	1.39077	0.649354	-5.44644	1.80894	1.95244	-0.179212	-1.10377	-0.319477	-0.939682	1.82247	0.256736	-0.0538882	1.7425	-0.398057	-1.52386	3.35665	4.38382	0.586089	0.962922	-2.07165	-10.2038	-1.77023	-2.33662	-5.64158	1.36016	-2.98222	-2.40457	-3.81761	-5.01657	-15.176	-7.14866	1.30603
M81	12	Zinc	772	8	0.0103627	1.27072	-2.04695	-0.466477	-2.6657	-1.97568	-0.317061	-1.42136	-0.622257	-4.3446	-1.94281	-4.29785	-1.24704	2.89532	2.94853	-6.6139	-1.42389	0.328333	-1.08189	-8.08433	-2.95072	-8.04955	1.97453	-0.81853	0.406695	-0.114697	0.776995	-0.906447	0.203158	-0.173353	-0.602817	5.01932	-2.51545	-0.711507	-1.36403	-0.209239	0.147671	-0.402393	1.24189	0.555612	3.25258	3.25282	-4.19256	0.0289249	1.3896
M82	12	Tunicamycin	705	0	0	-0.573613	-2.07868	2.43987	-0.419079	0.0696418	9.3333	0.846168	0.813796	0.612297	-0.22967	1.19	-0.337069	-0.311411	-1.32229	0.891623	2.40949	1.41458	0.992685	1.70496	1.13627	-0.167741	0.41143	-2.10481	-1.03678	0.0591385	-0.98159	-0.916859	0.481689	0.658951	-0.012152	0.0578201	-0.171923	-4.03473	-2.49692	-1.5541	-2.85634	-0.754526	-1.25332	-1.59988	-4.45152	-1.07451	-9.50953	-3.32397	-2.14256
M83	12	Tunicamycin	2658	1	0.000376223	3.89834	4.61021	-7.62699	-13.0527	-3.00096	-2.01741	-1.72679	-4.94784	-6.93588	-5.50173	-4.53302	-3.96518	-1.51316	-0.328134	0.132198	0.226145	-0.757808	1.17095	0.32734	1.47979	-1.40921	0.766621	1.6094	1.57117	0.107822	-1.58083	1.01356	-1.41343	2.57435	1.34025	1.04181	0.238405	4.78401	-0.818518	-5.58345	0.788198	-1.18997	0.371708	0.709264	2.9615	0.0530435	6.43572	3.82101	-0.483062
M84	12	Iron	425	1	0.00235294	-0.596188	0.706921	-4.60302	1.62109	-0.283056	-1.23859	-0.668052	0.564856	-1.00703	1.16036	0.469764	0.749888	0.0665657	6.73613	-1.88558	-1.39423	-0.484748	1.91746	-1.10682	-0.49084	2.34327	2.1911	-0.832037	-2.66771	-0.139721	-2.08332	-1.3691	-1.21822	-0.60327	0.201363	-0.429228	-1.40301	1.15955	5.32378	2.93605	0.357604	-0.634852	-0.769066	-1.1358	0.1837	-1.99866	-2.76773	0.694392	-0.396359
M85	12	Iron	988	16	0.0161943	-0.69822	-4.88693	4.15831	-2.74511	-0.374357	0.347392	-1.27925	0.0498163	-1.58713	0.436004	-0.765973	-1.12031	-2.14298	4.70633	-1.12427	1.85283	1.41789	6.45903	1.6295	1.52474	-0.271122	3.91124	-2.01613	-1.38777	-0.946872	-1.095	-1.31421	0.772833	-0.504979	-1.23516	-0.906555	-0.634351	-3.5627	-2.72451	-2.04634	-3.71009	0.231166	-1.48061	-1.8013	-6.15166	-1.37166	2.8463	-2.67338	-3.66121
M86	12	Tunicamycin	2263	1	0.000441891	-4.36692	-2.54446	-0.207246	-2.2648	1.1242	-0.226315	0.638711	-1.28442	-1.15278	1.47949	0.0554683	0.404952	1.21525	1.46367	-20.143	8.59764	-1.52375	2.29363	-0.963277	-1.77627	1.59077	-0.945214	0.667384	0.49956	1.01611	-0.204733	-0.718621	0.233392	4.52448	0.852291	0.475668	-1.37959	2.55767	5.7054	-0.412149	1.64124	1.75211	-1.77389	0.0236252	4.76238	0.135442	-9.10961	0.442262	0.76674
M87	11	Tunicamycin	278	0	0	5.39777	1.80649	2.41884	-6.11156	1.86285	5.94393	0.688184	1.53767	0.572787	0.622525	-2.4841	-1.48613	-2.4205	-0.85976	-2.24916	-1.47244	1.62007	2.34343	1.7564	1.18602	-0.781925	1.44281	-0.157957	0.45055	-0.335797	-0.789007	-0.940668	1.56089	2.68277	1.84324	-0.582476	-0.0785501	2.23096	-2.2809	-1.84351	-2.52533	-1.03583	-0.541383	0.0673262	-3.28519	0.508398	-12.9747	-0.536614	-1.0338
[truncated: 35 more columns]
